# Supplementary material for: Concomitant Duplications of Opioid Peptide and Receptor Genes before the Origin of Jawed Vertebrates
Source: PubMed Central journal article supplement (PMC2865548; doi:10.1371/journal.pone.0010512), 2010-05-06

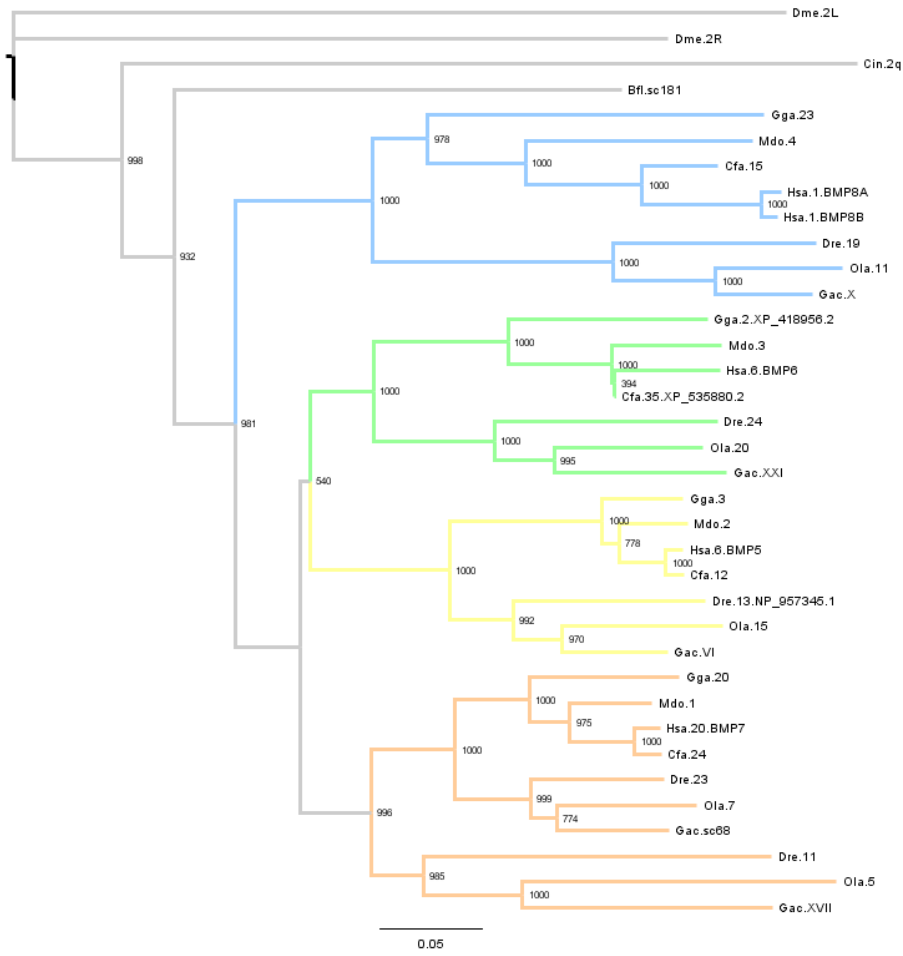

BMP, NJ

BMP, QP

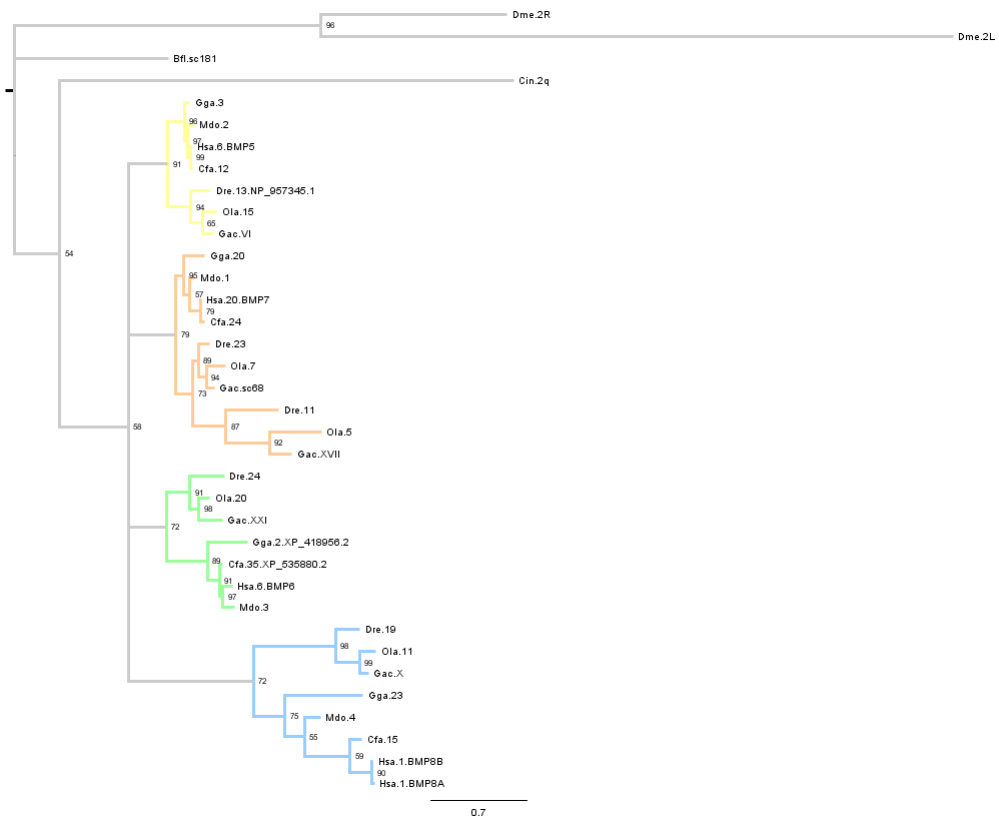

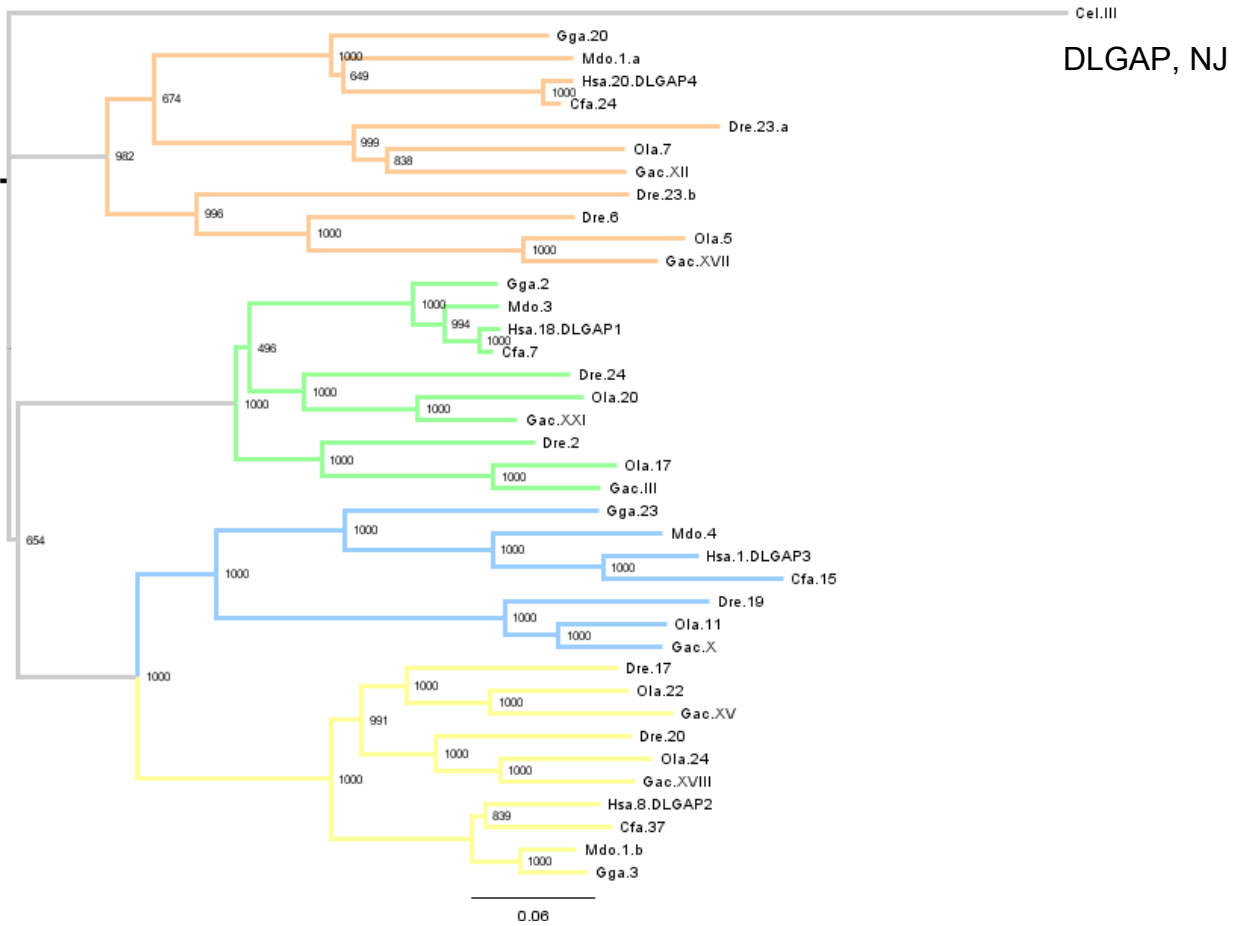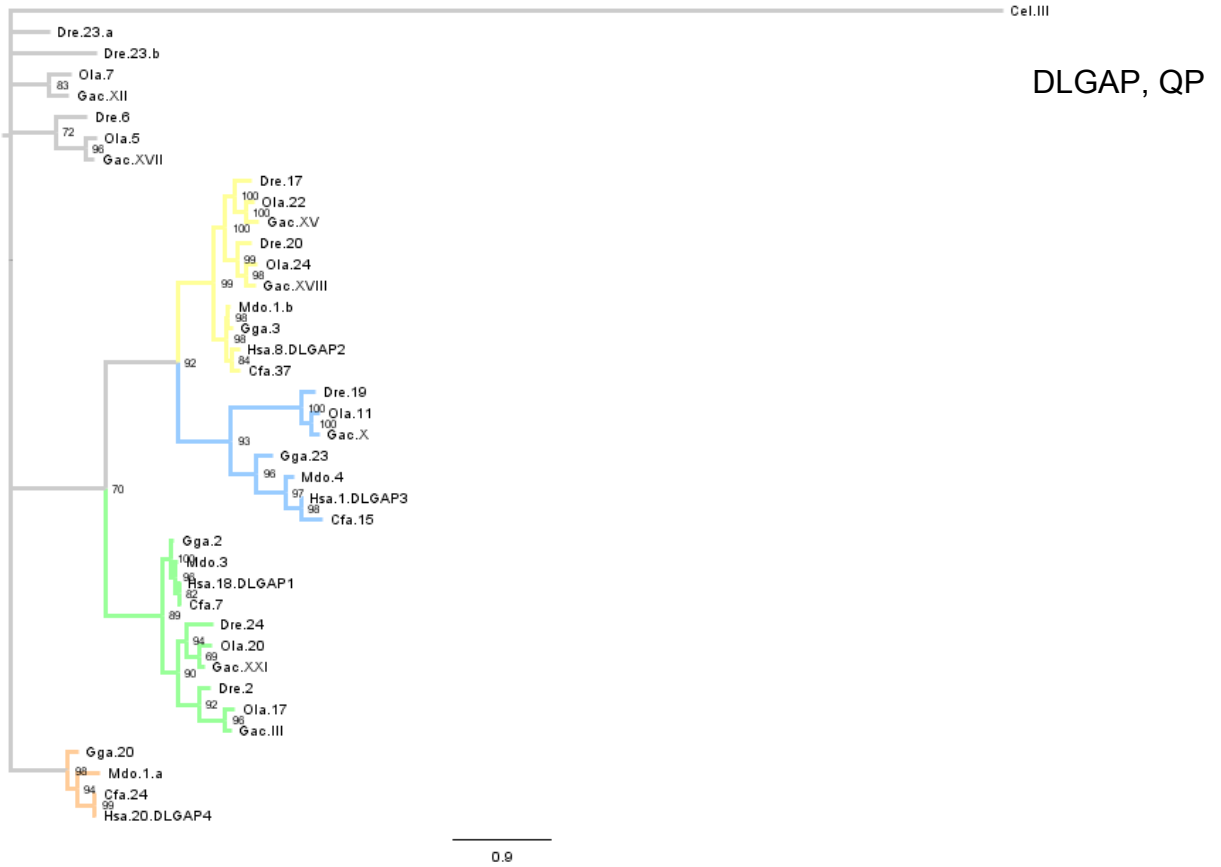

EPB41, NJ

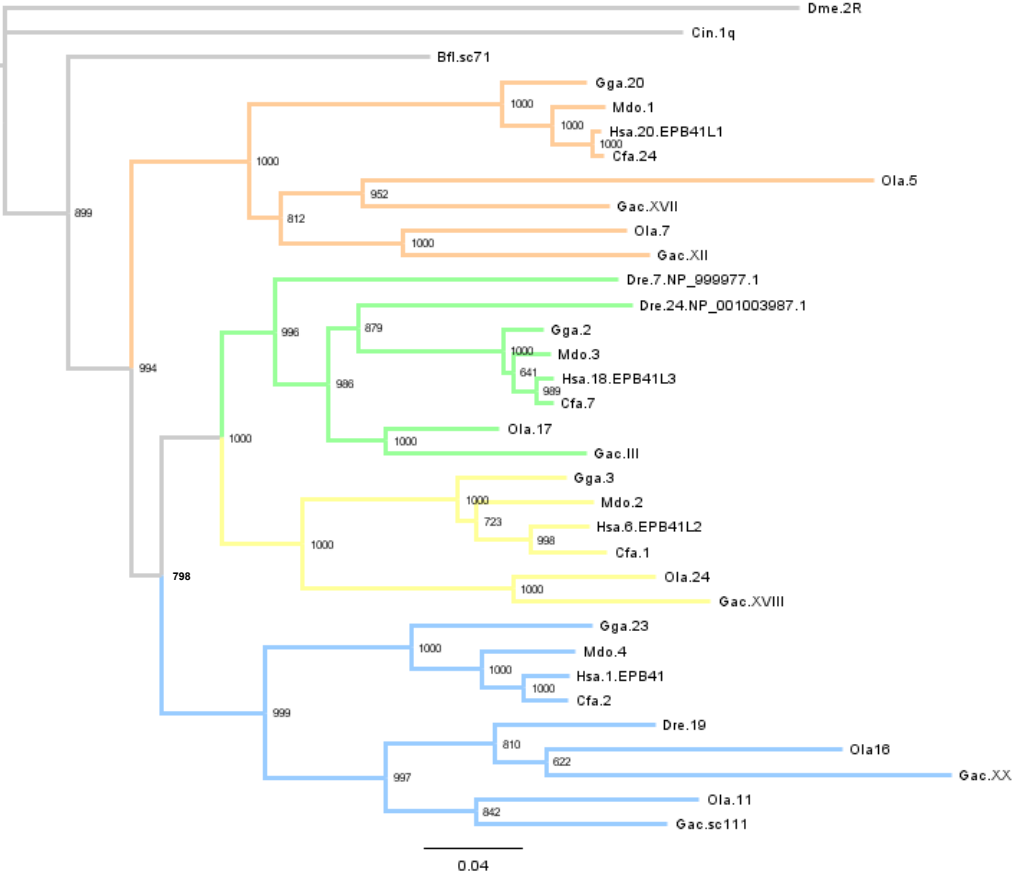

EPB41, QP

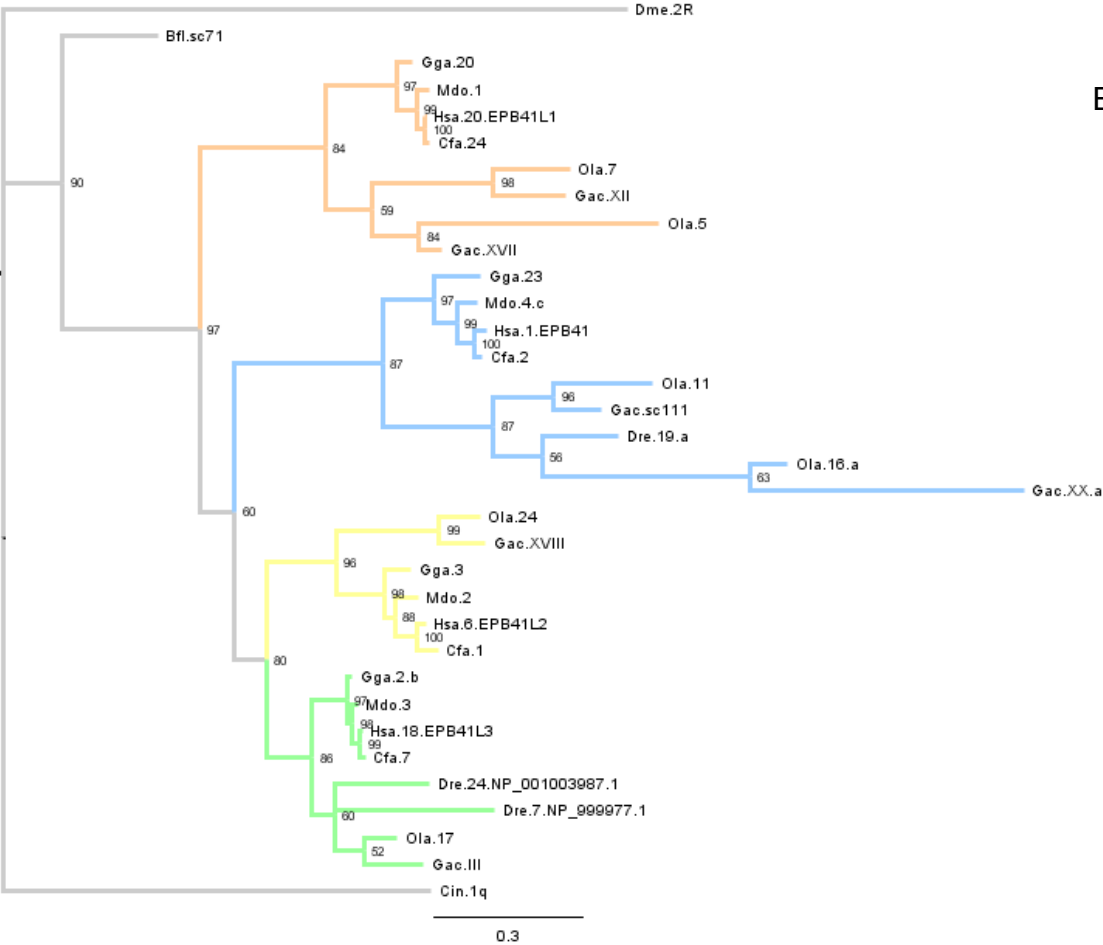

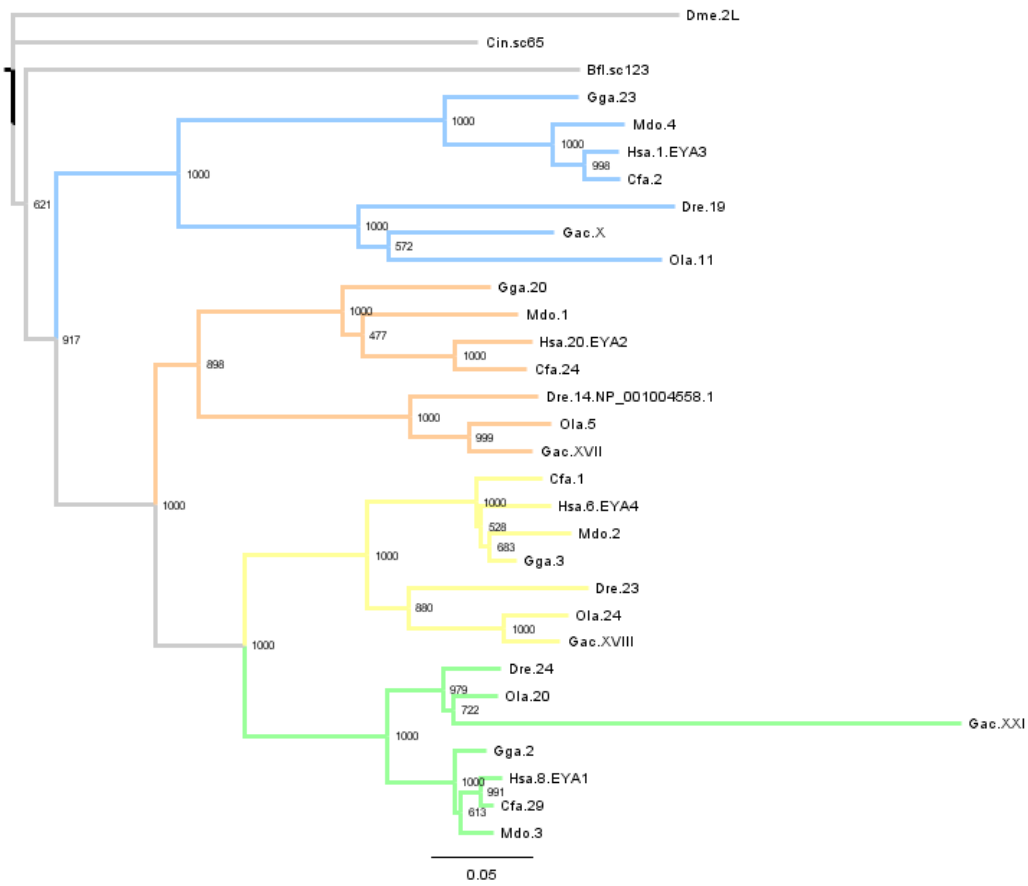

EYA, NJ

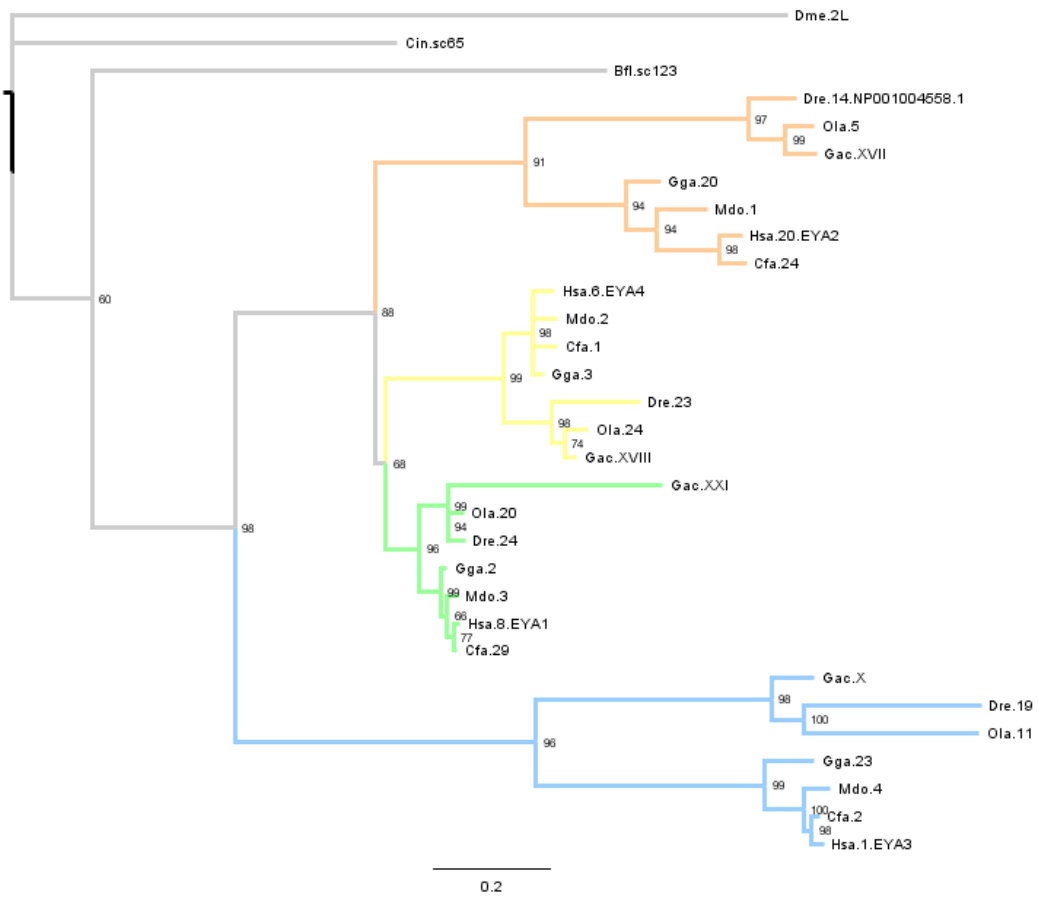

EYA, QP

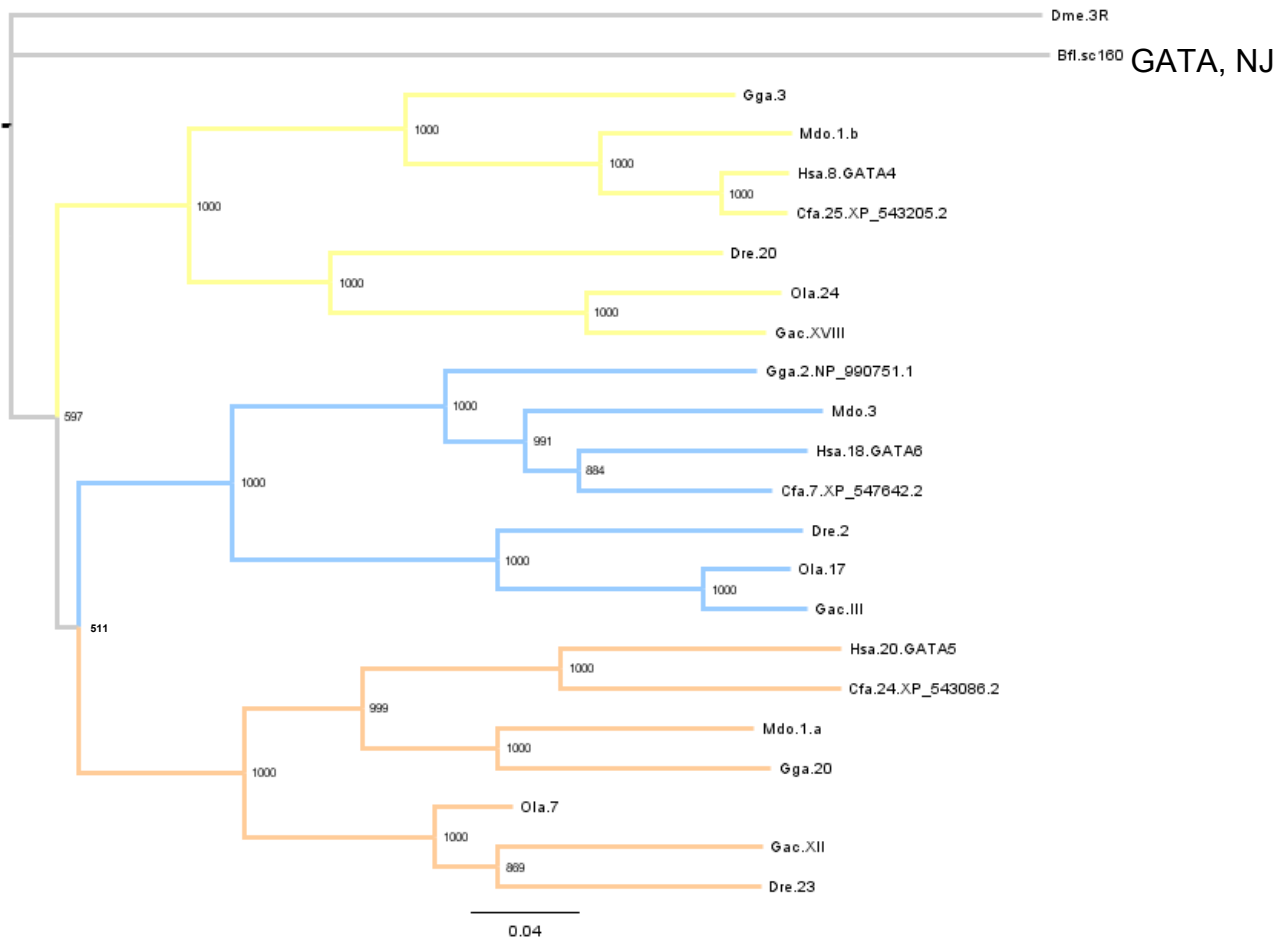

GATA, QP

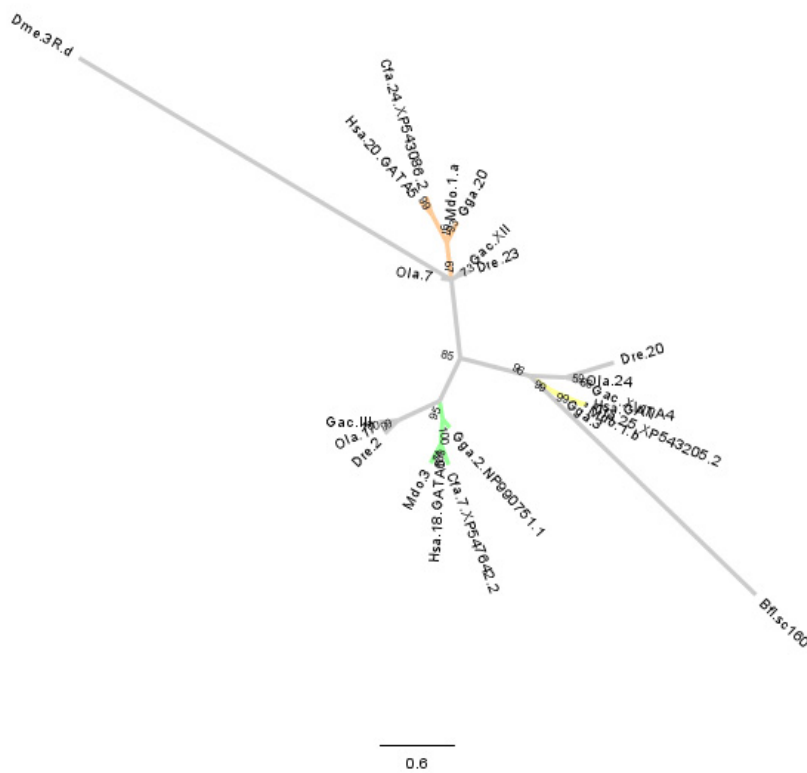

KCNQ, NJ

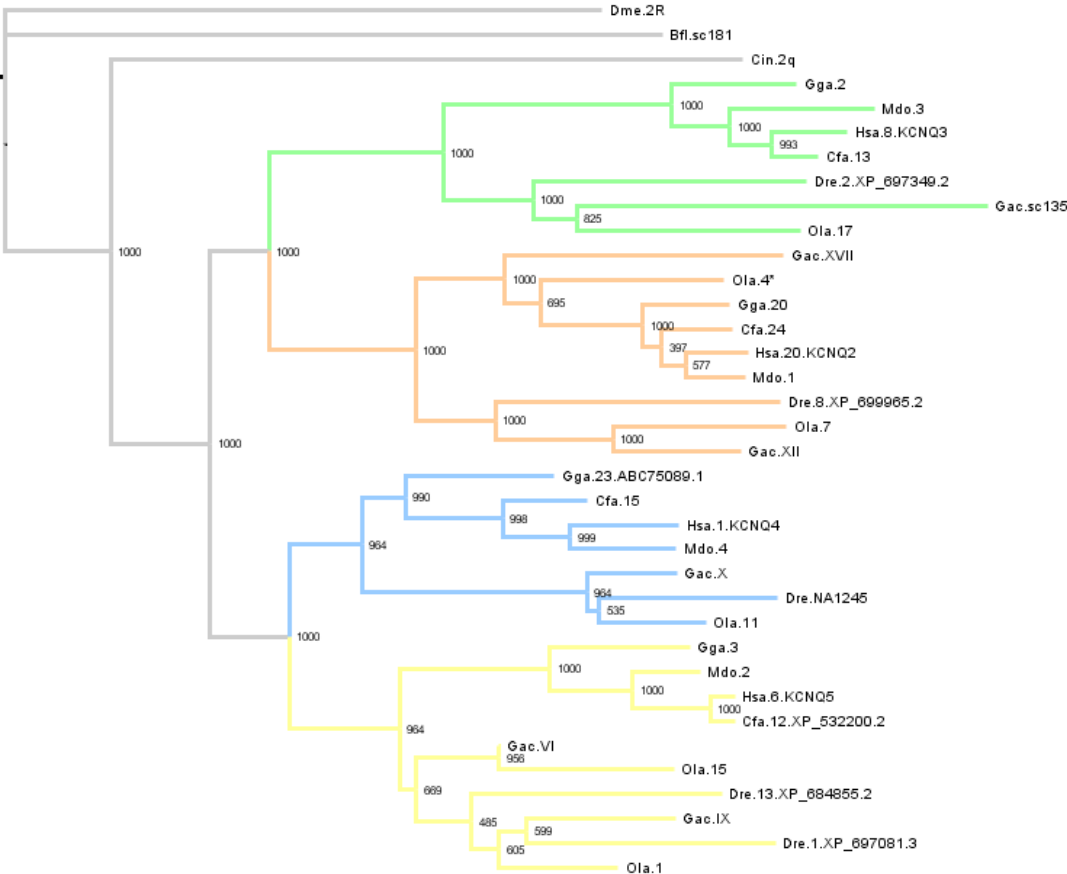

KCNQ, QP

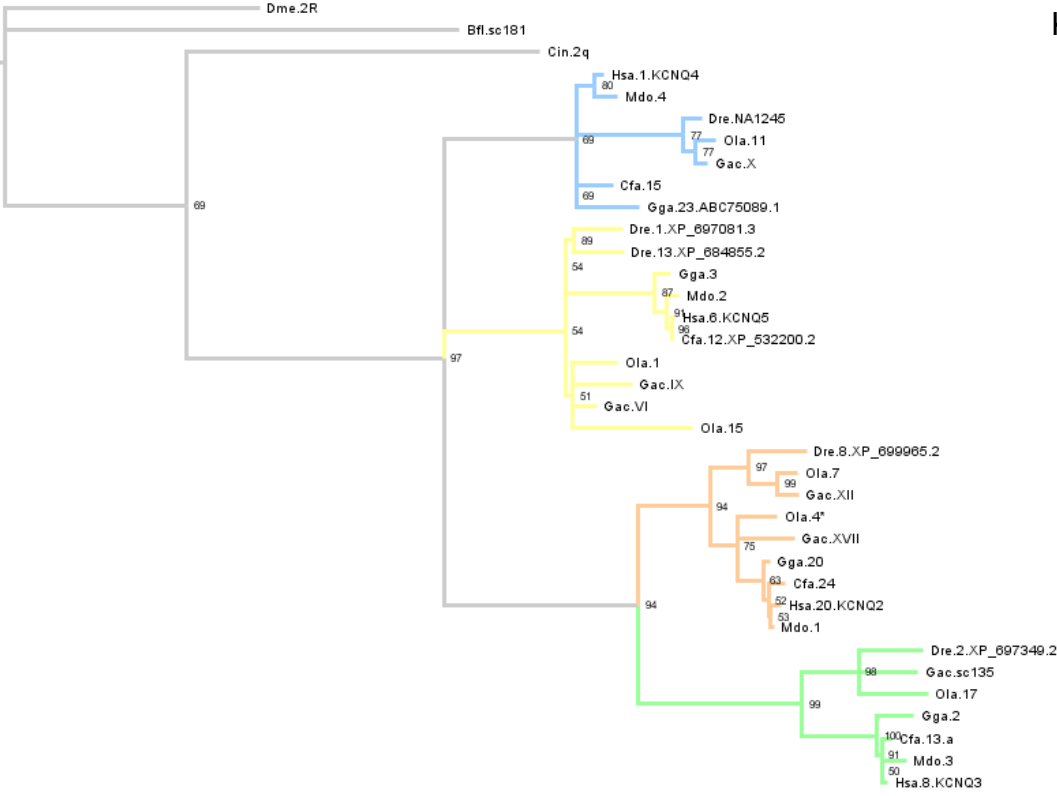

0.5

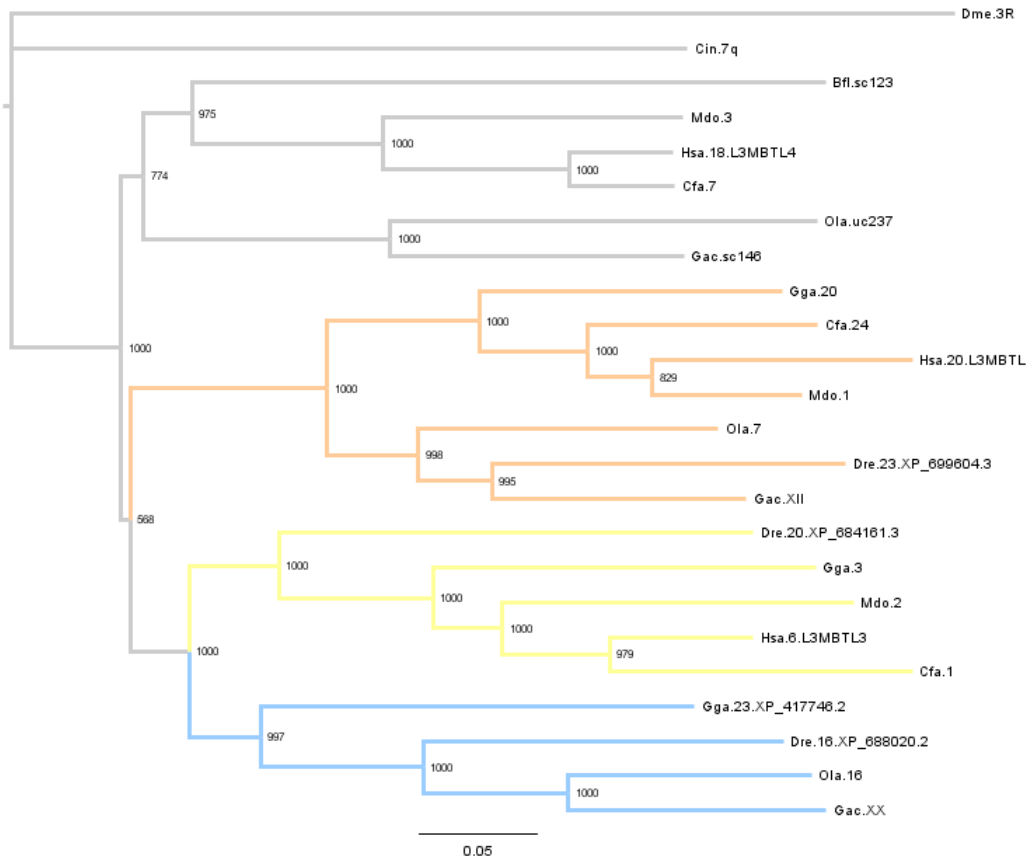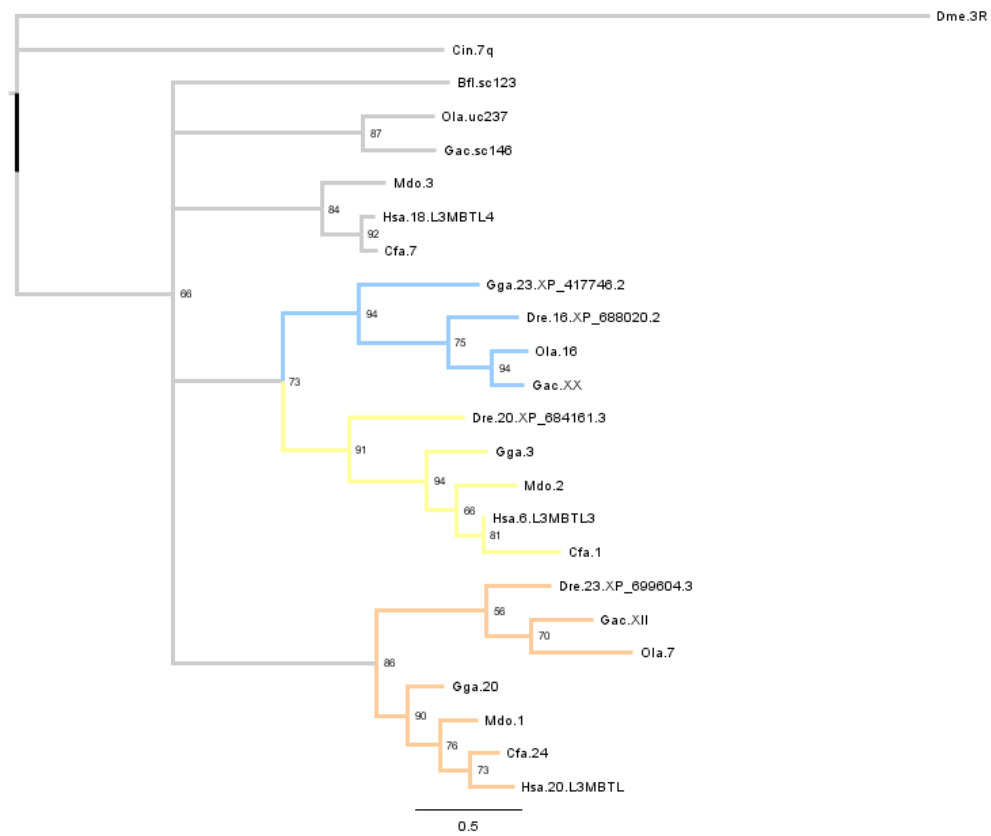

LAMA, NJ

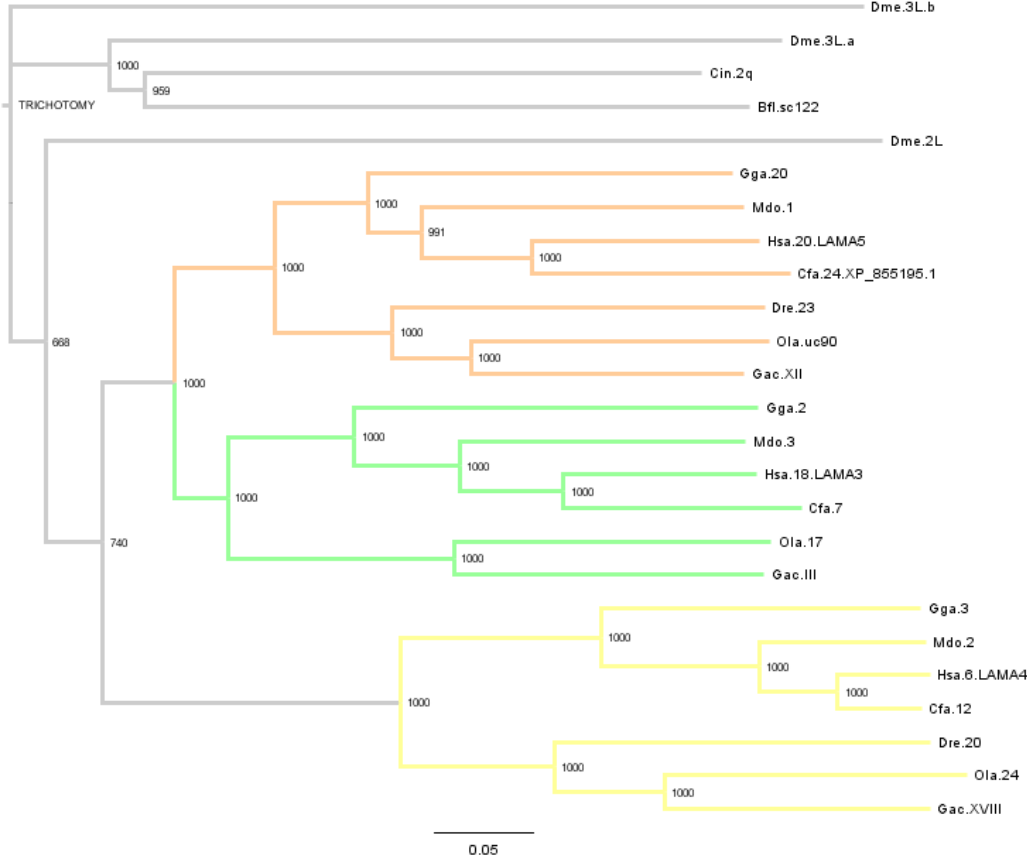

LAMA, QP

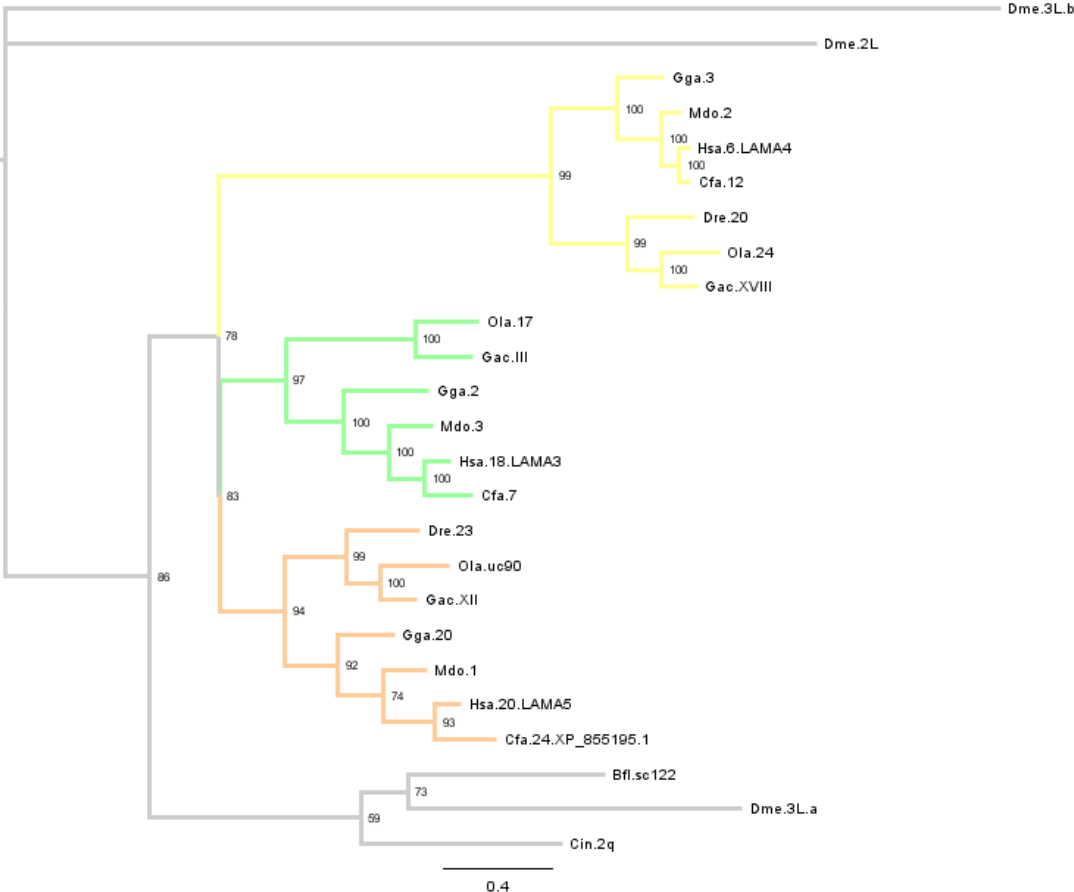



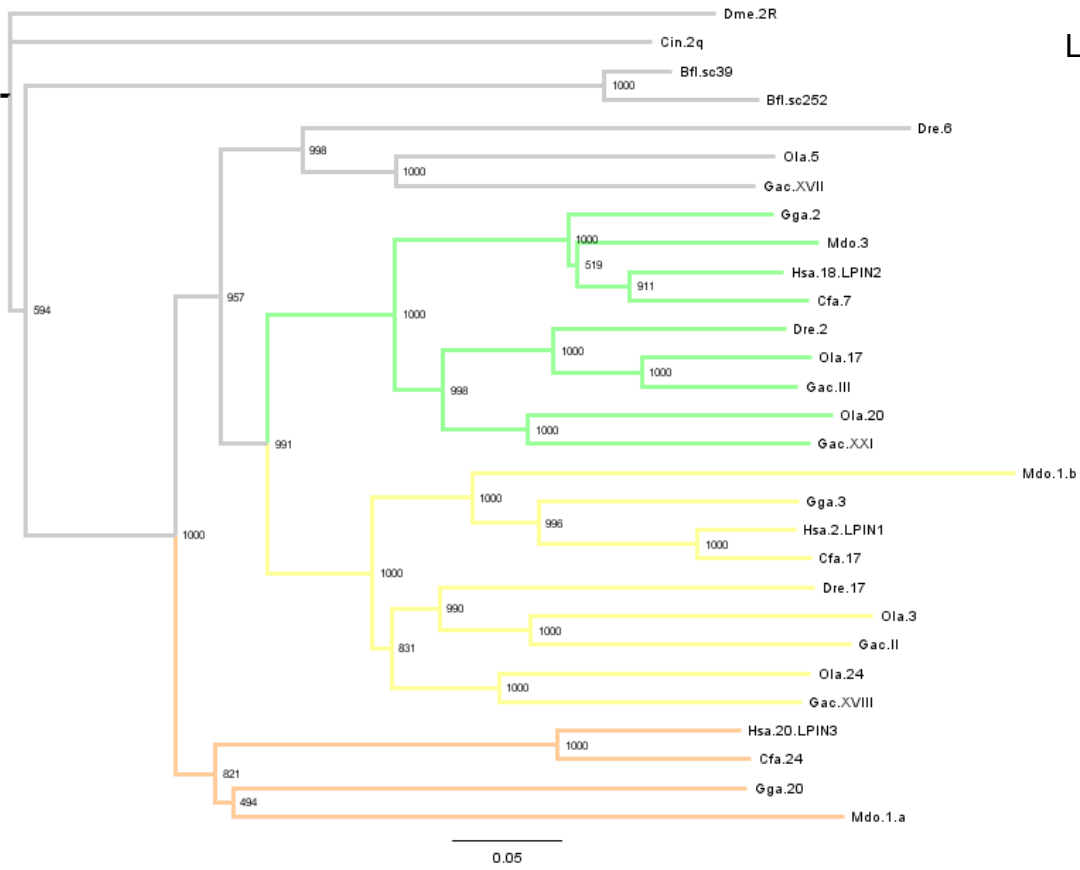

LPIN, NJ

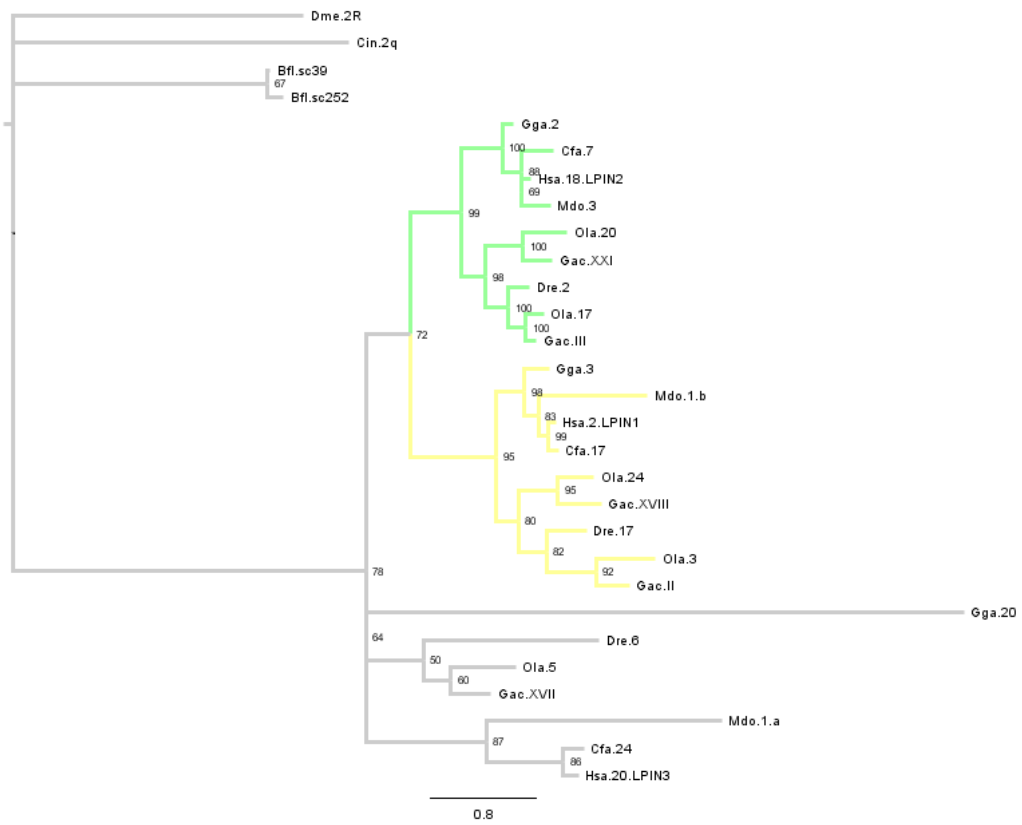

LPIN, QP

MATN, NJ

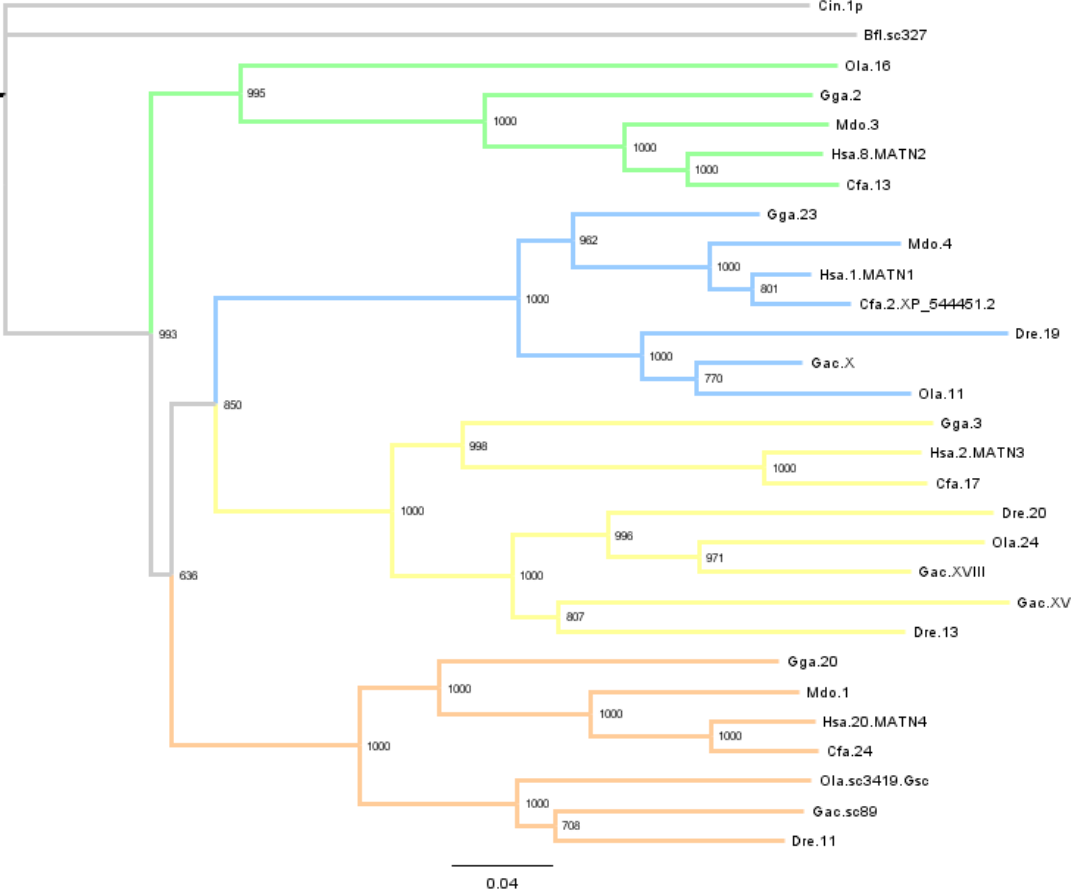

MATN, QP

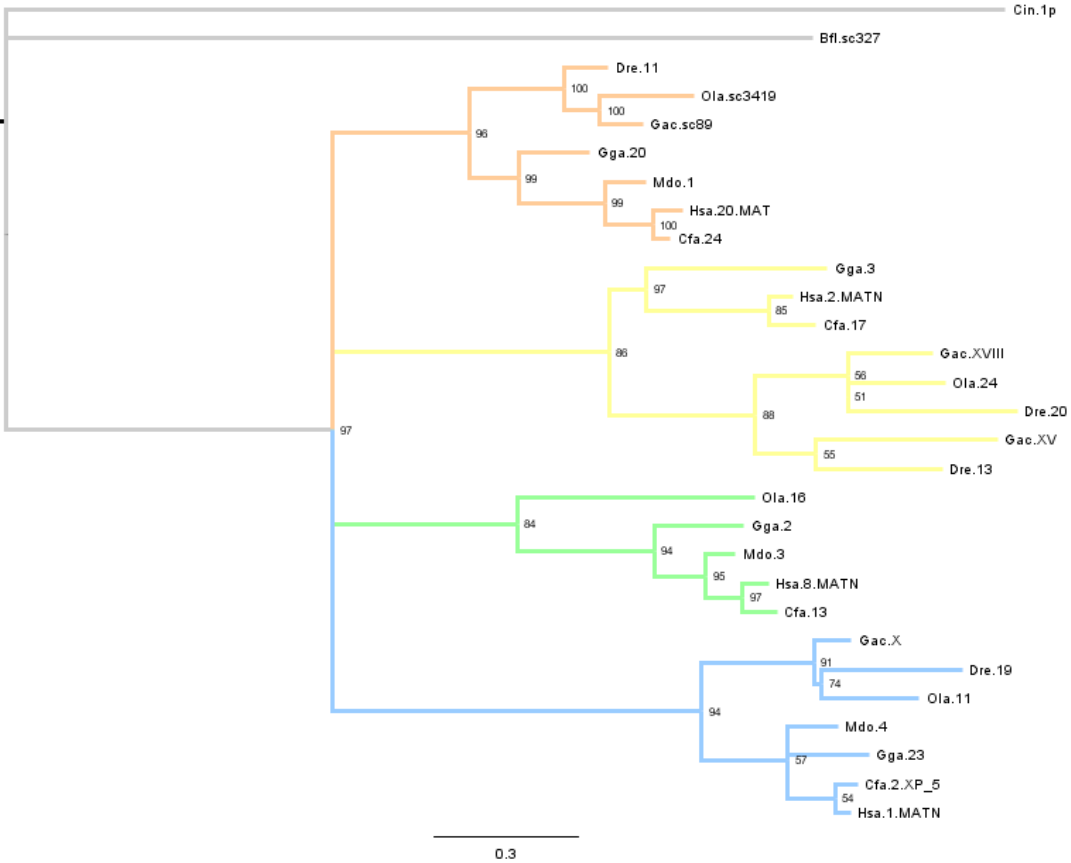

MYB, NJ

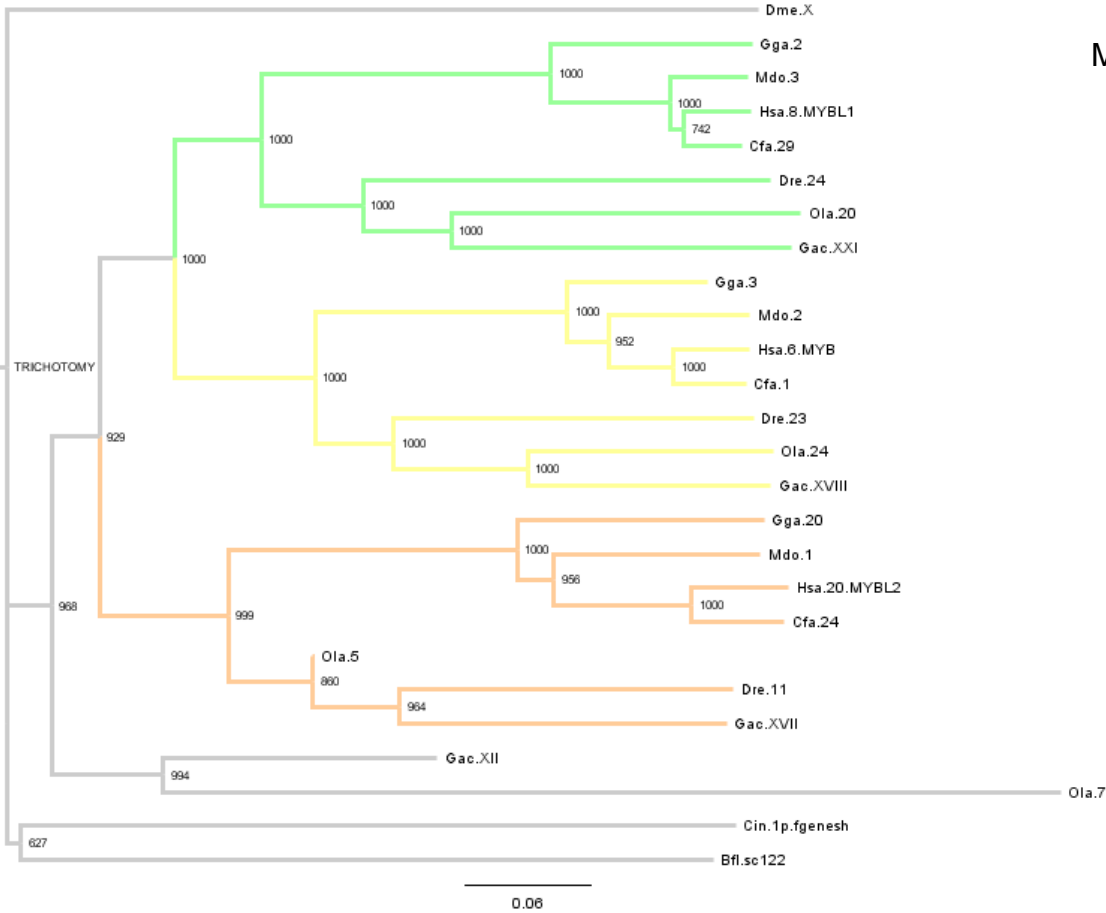

MYB, QP

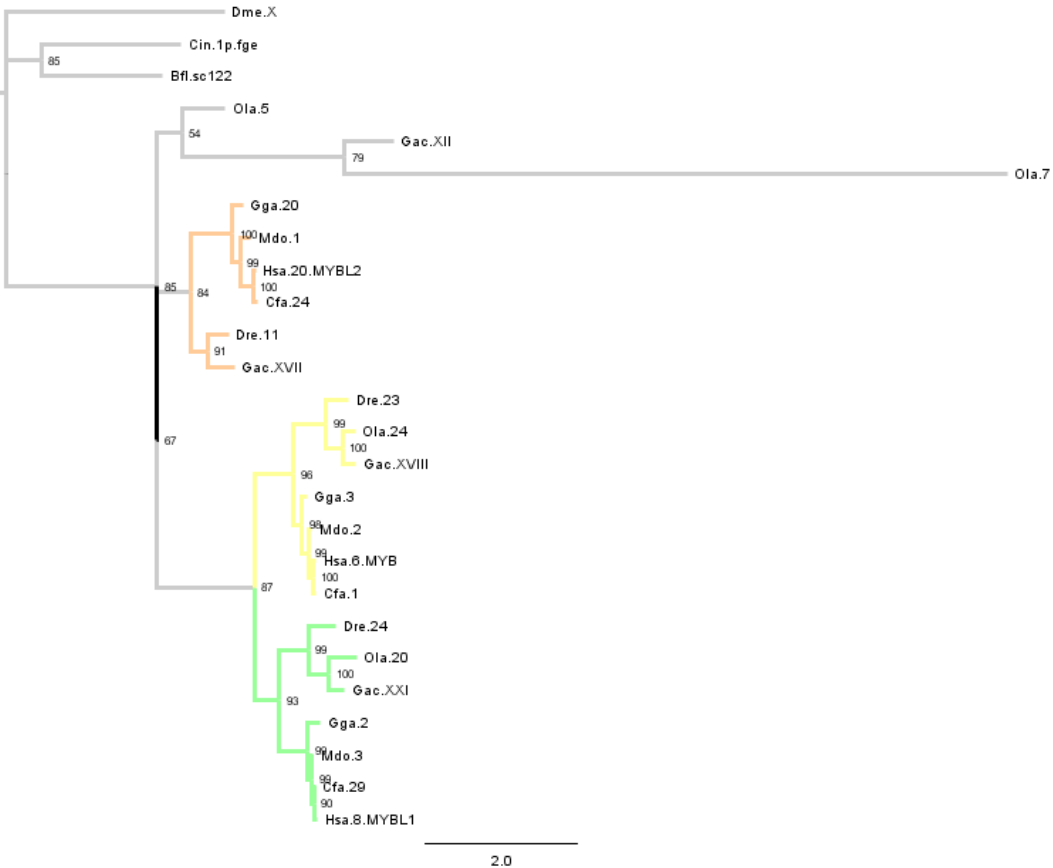

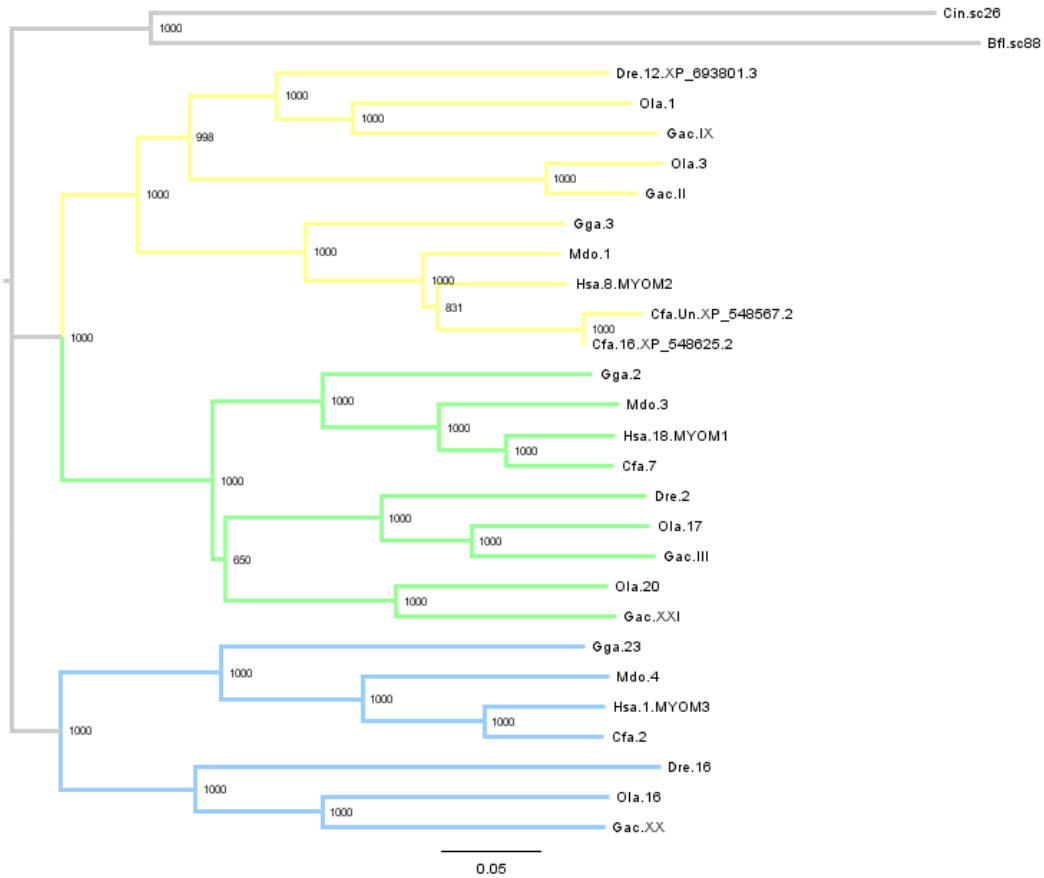

MYOM, NJ

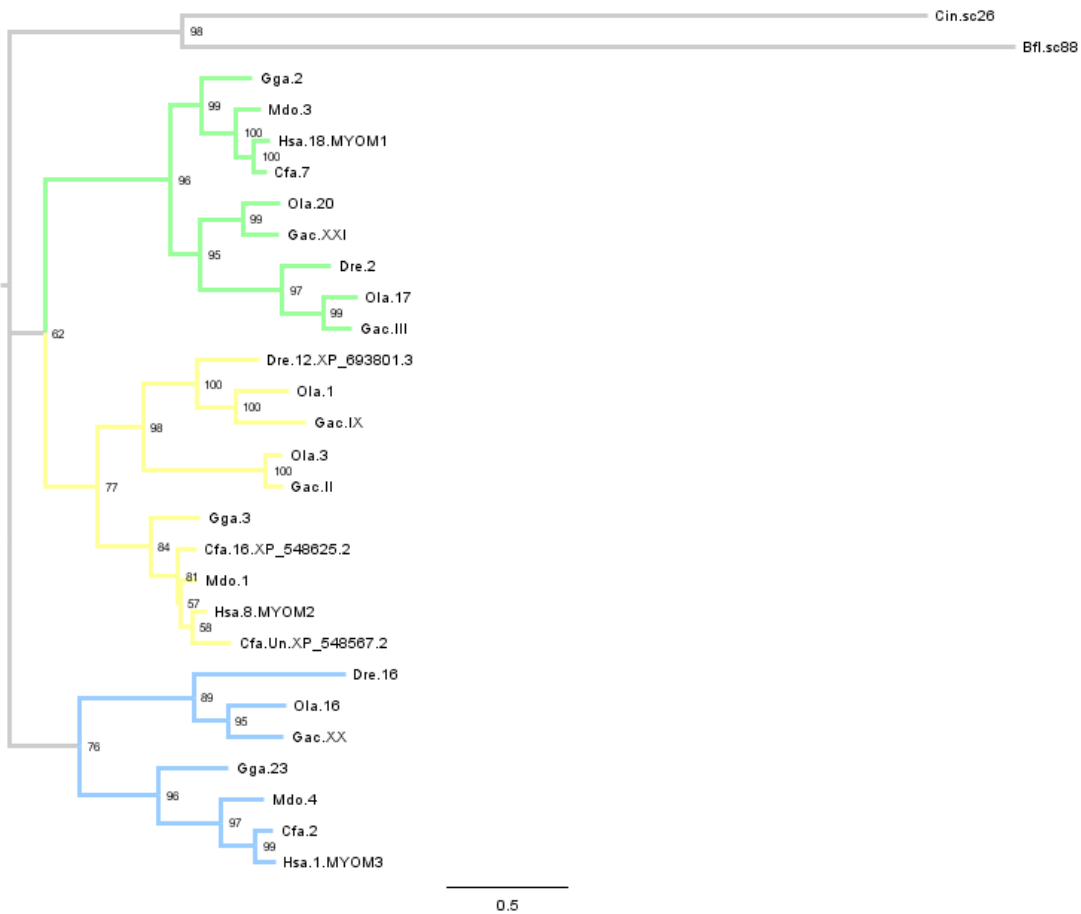

MYOM, QP

MYT1, NJ

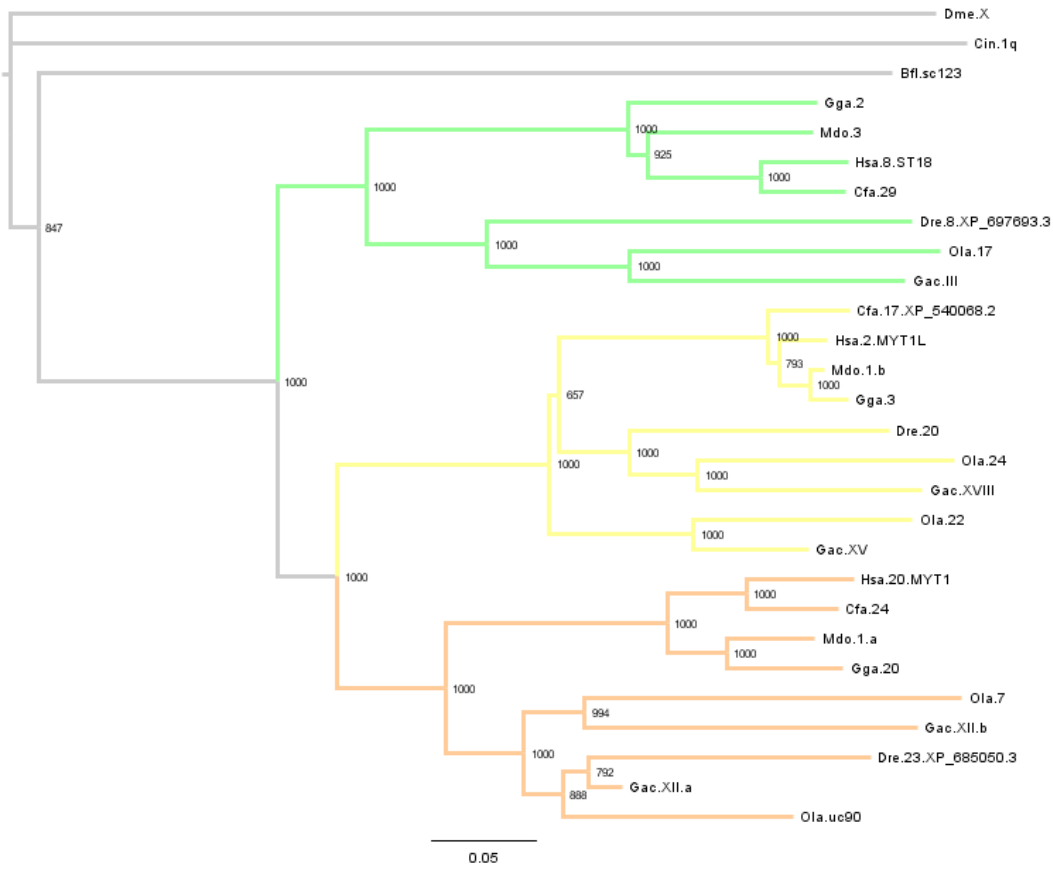

MYT1, QP

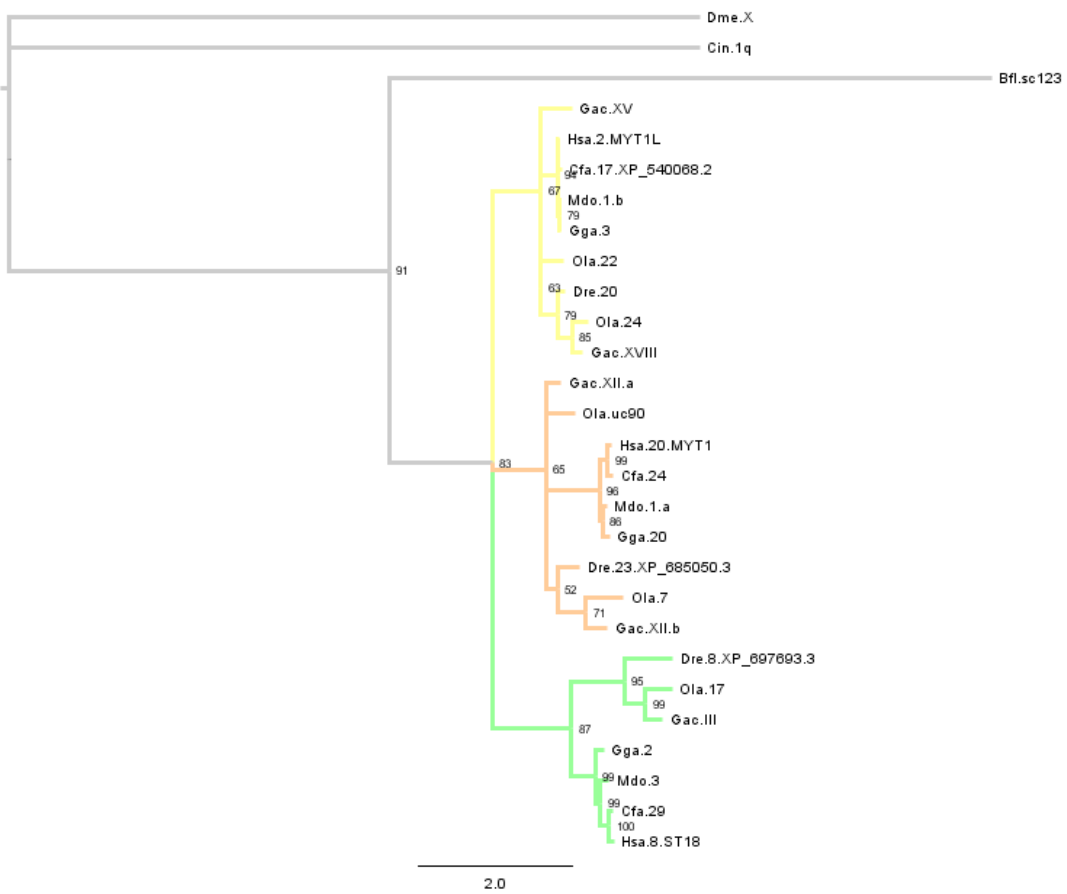



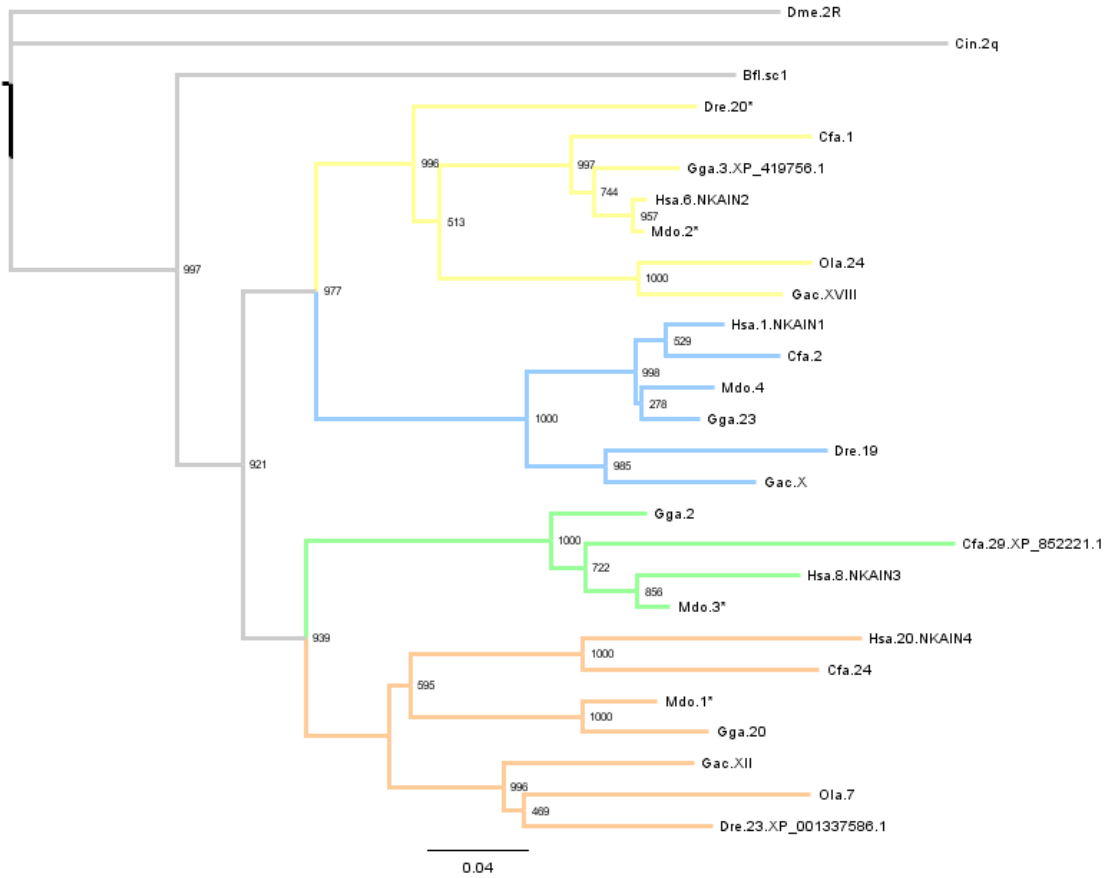

NKAIN, NJ

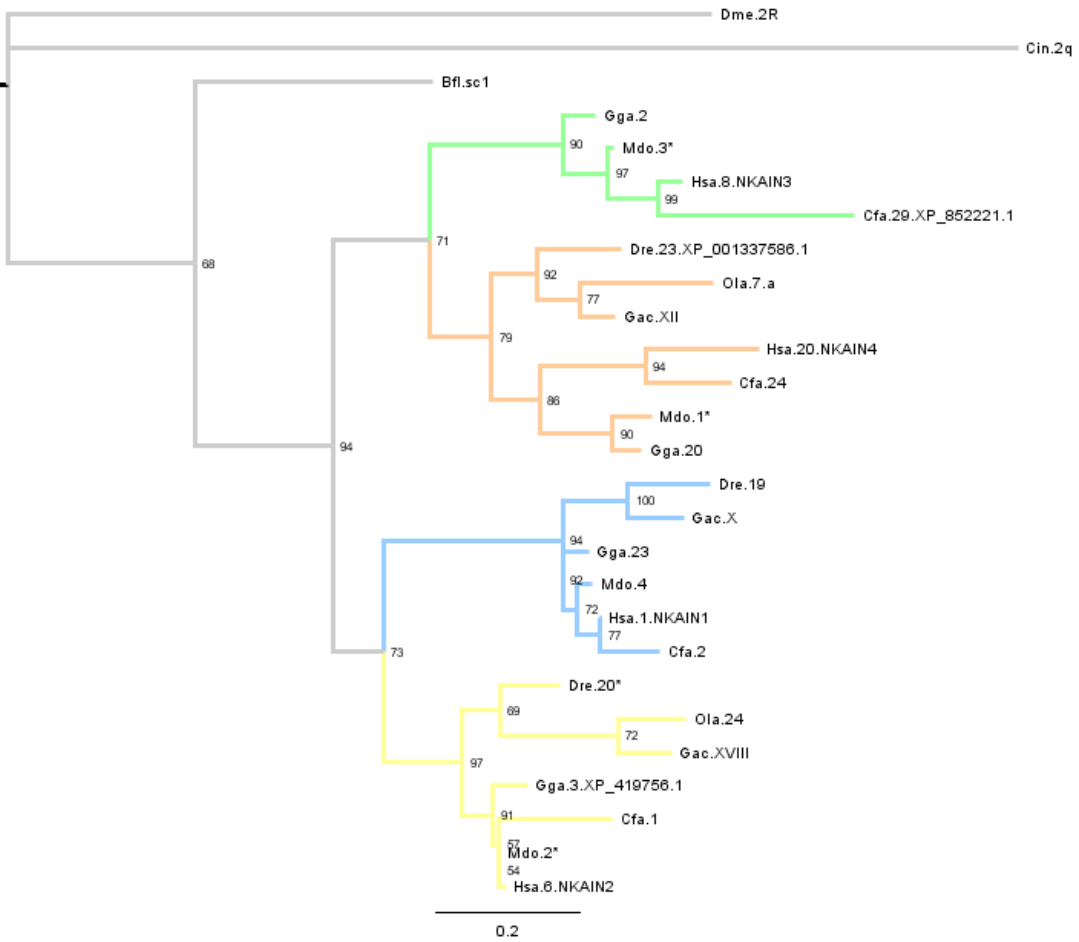

NKAIN, QP

OPIOID, NJ

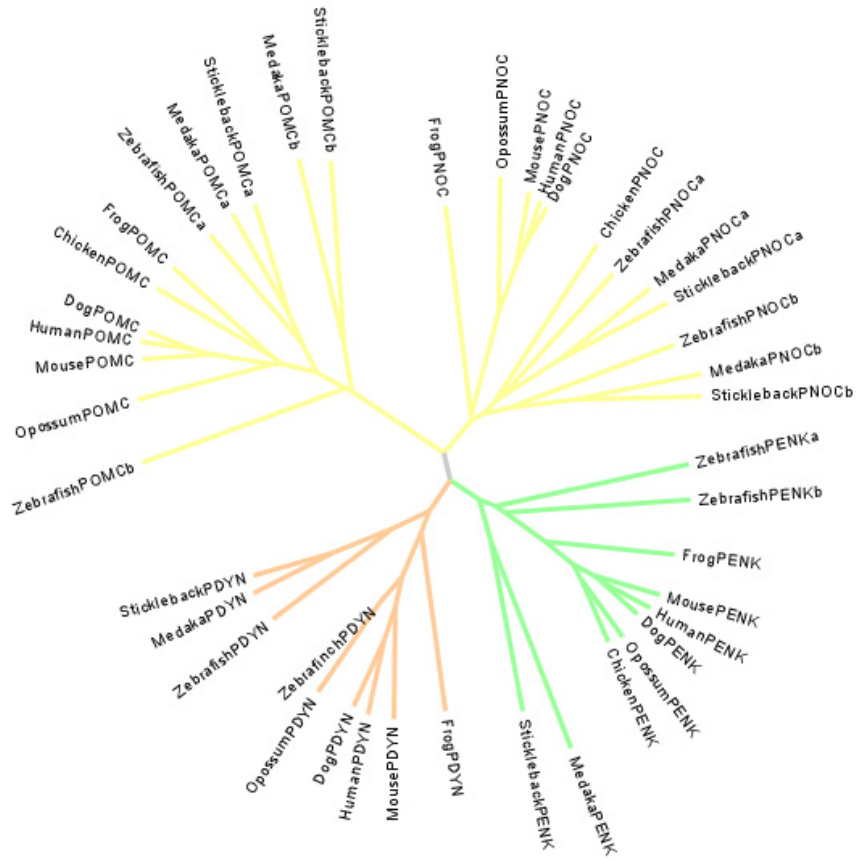

OPIOID, QP

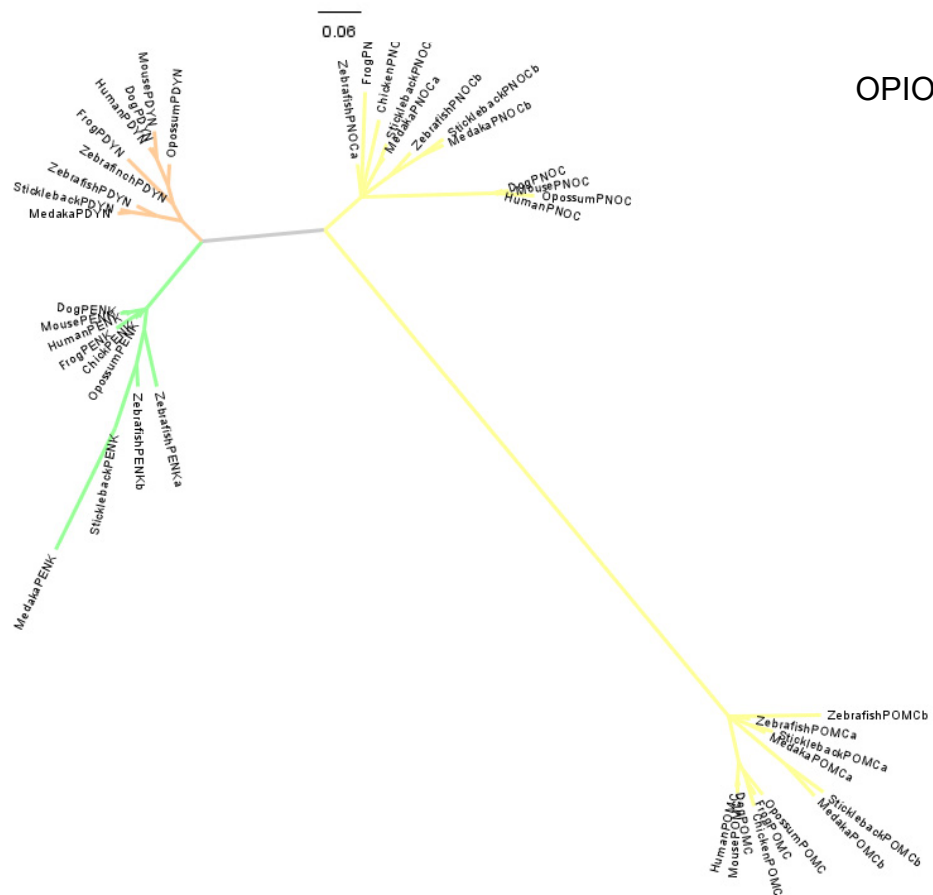



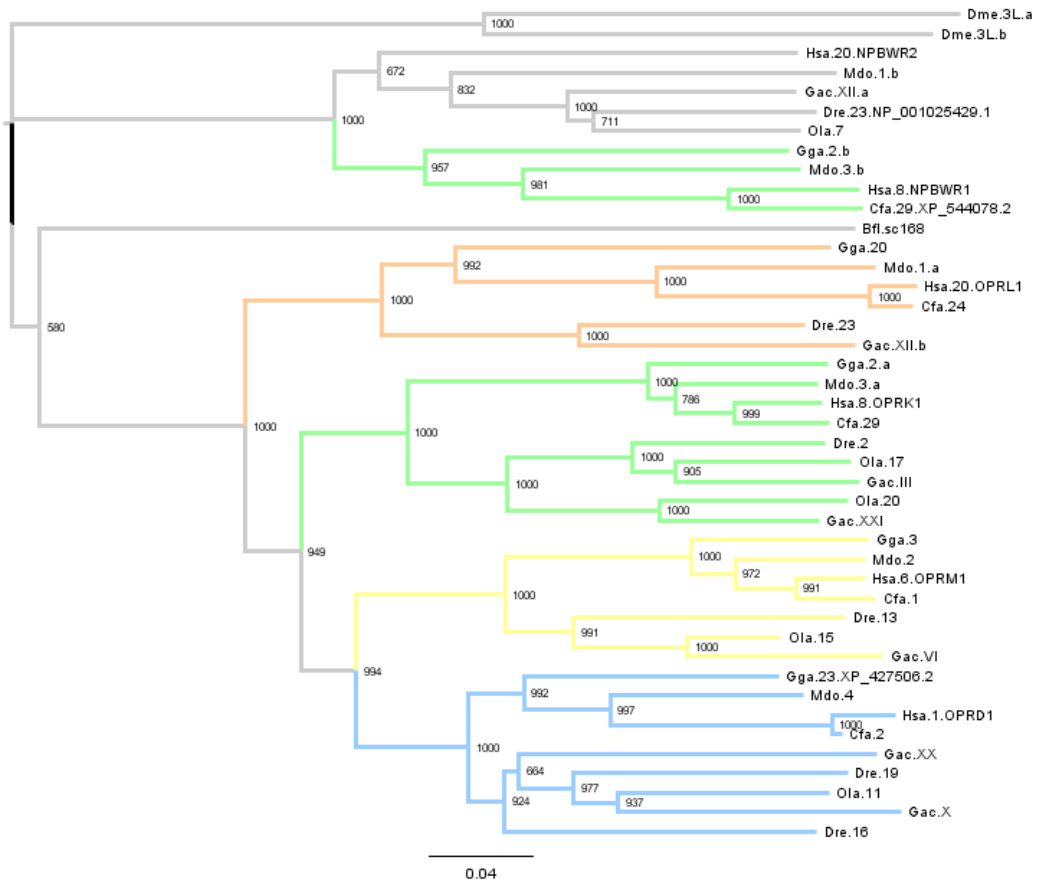

OPR/NPBWR, NJ

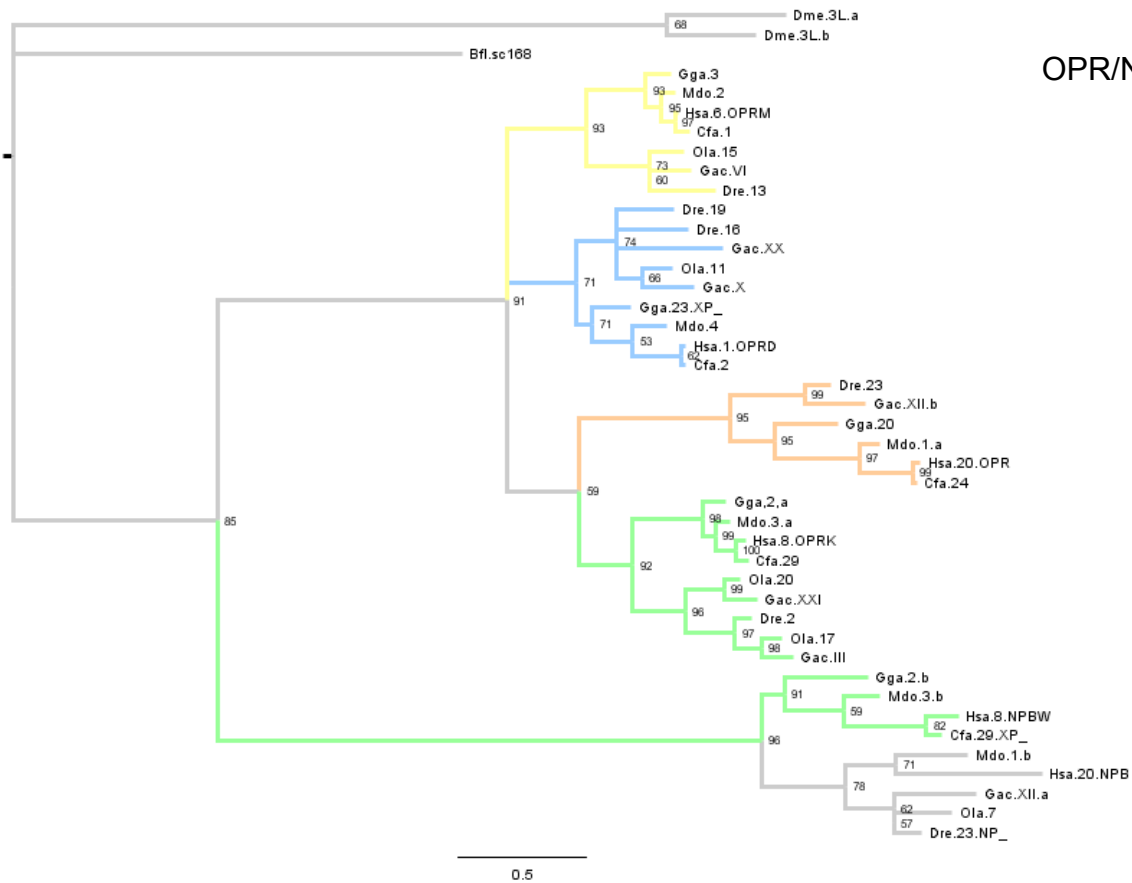

OPR/NPBWR, QP

PHACTR, NJ

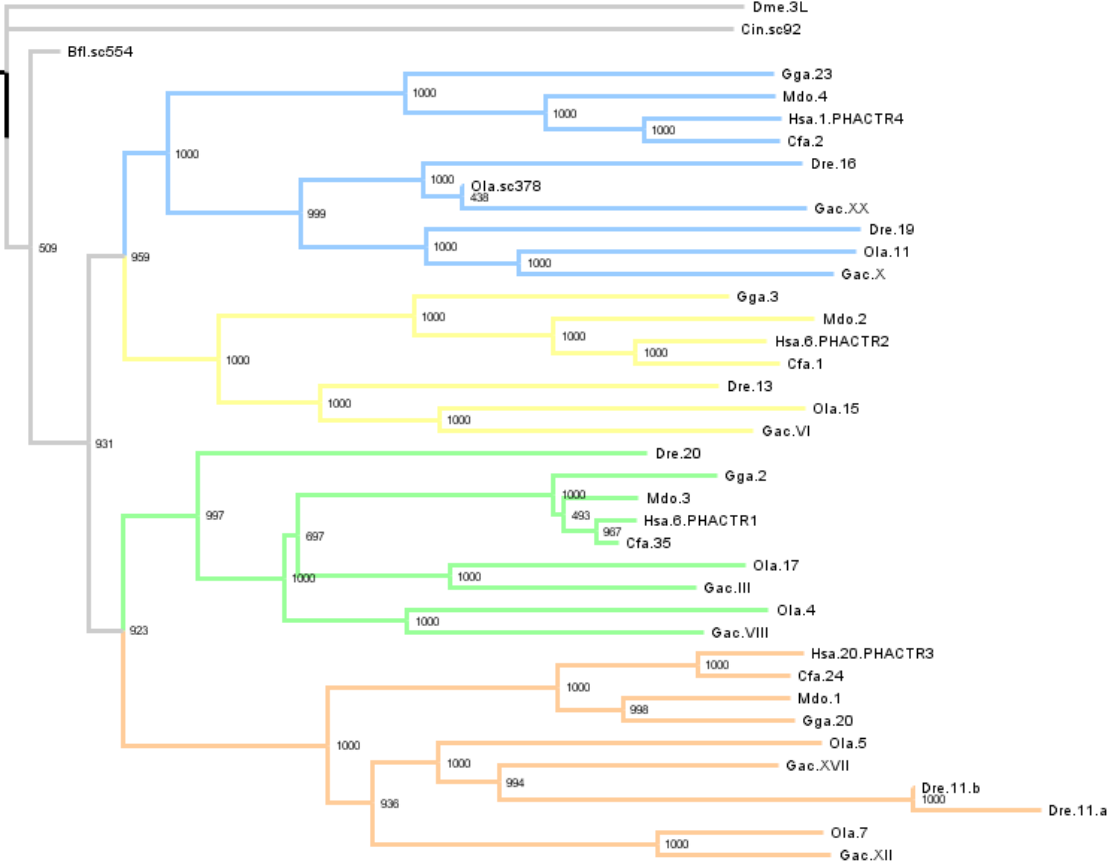

PHACTR, QP

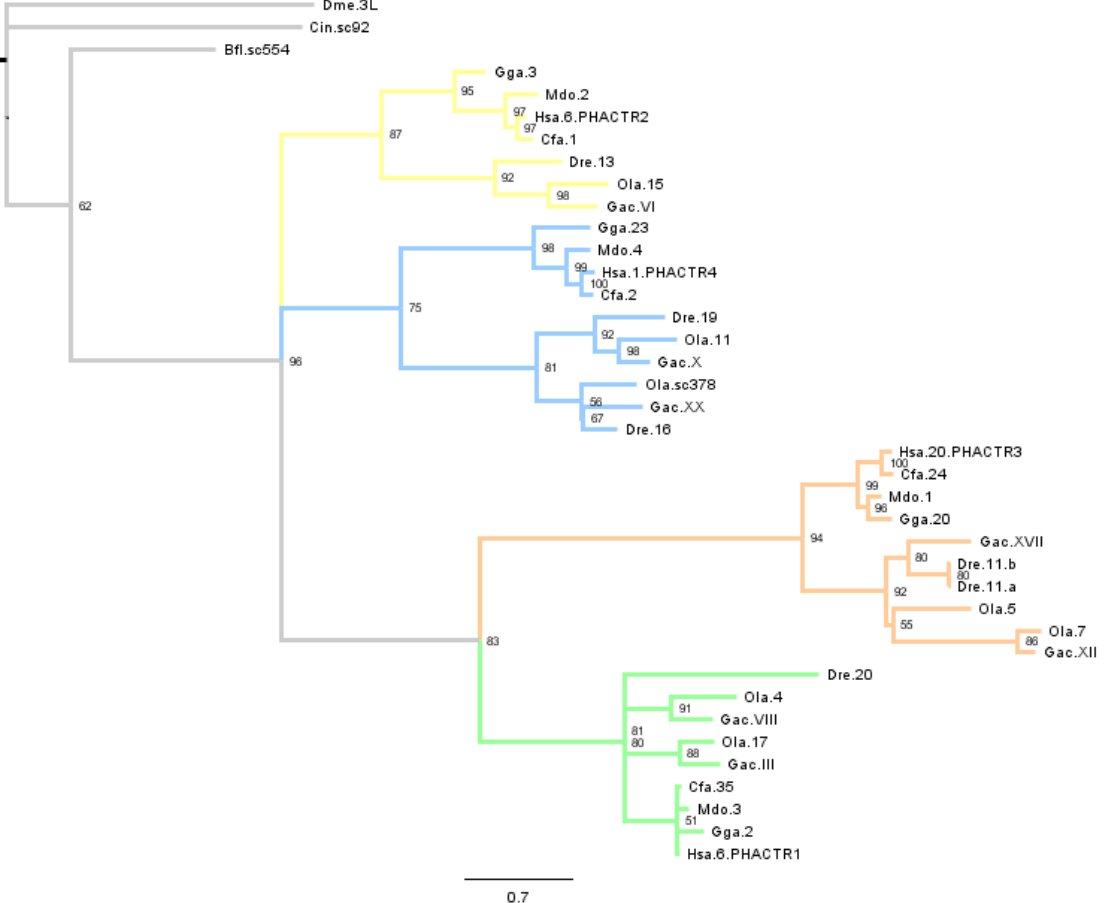

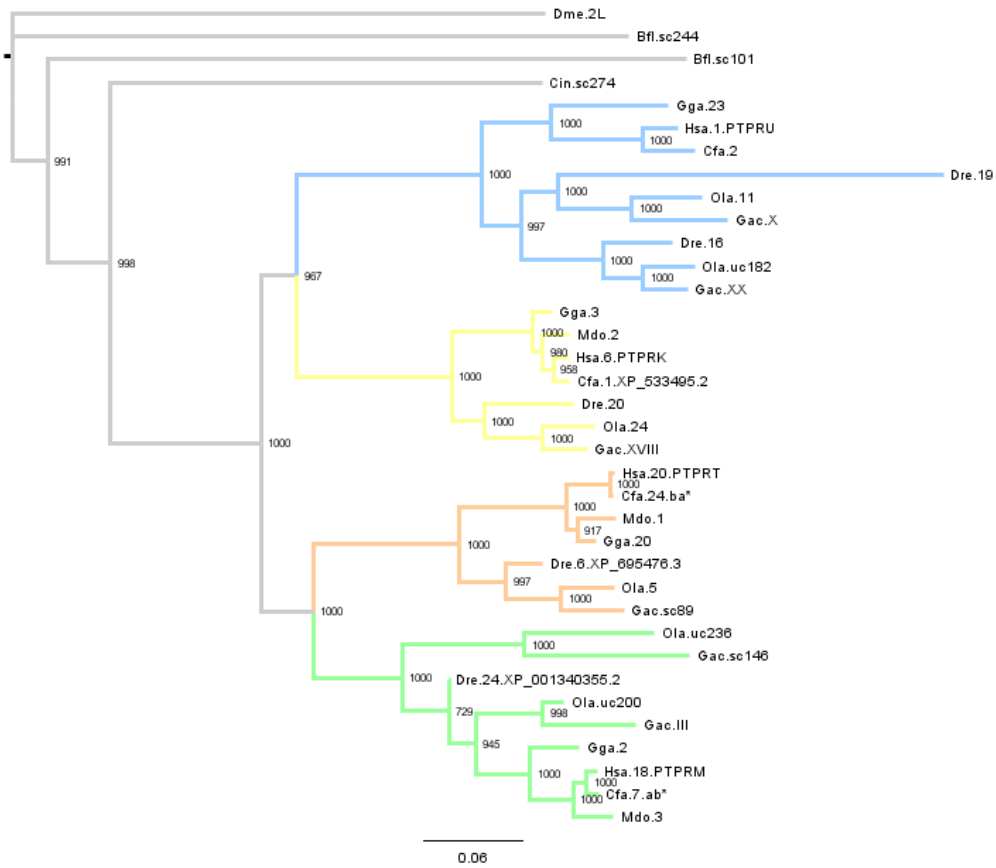

PTPR, NJ

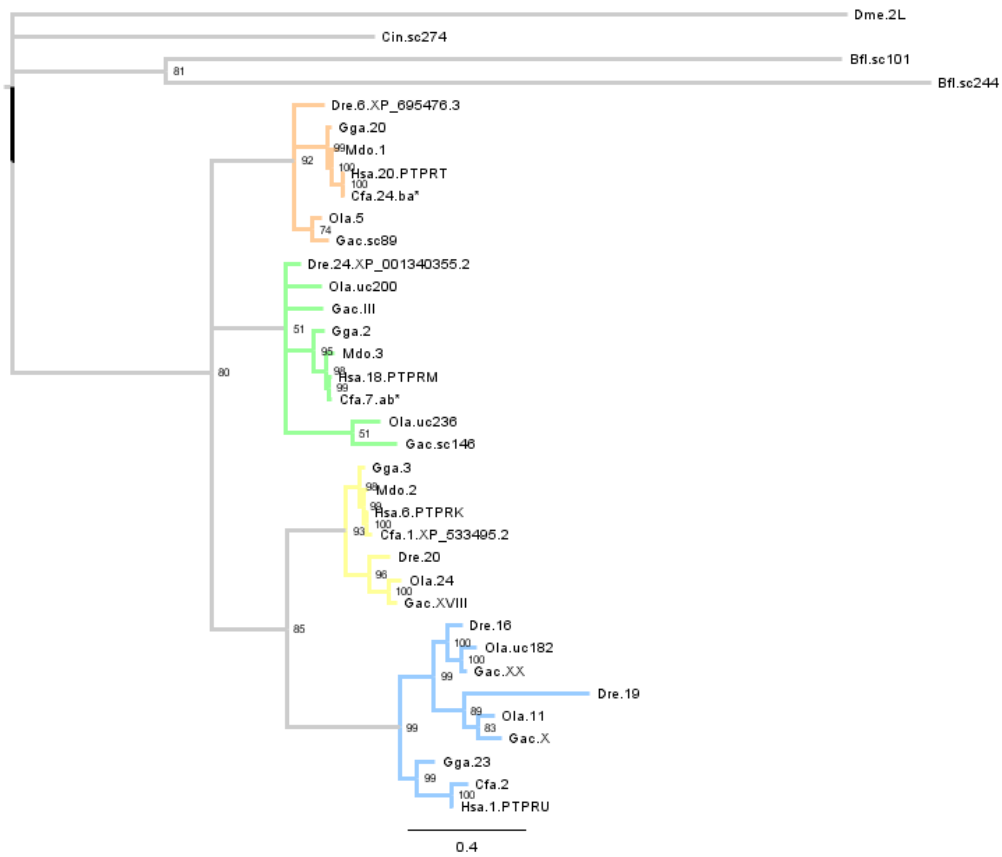

PTPR, QP

RGS, NJ

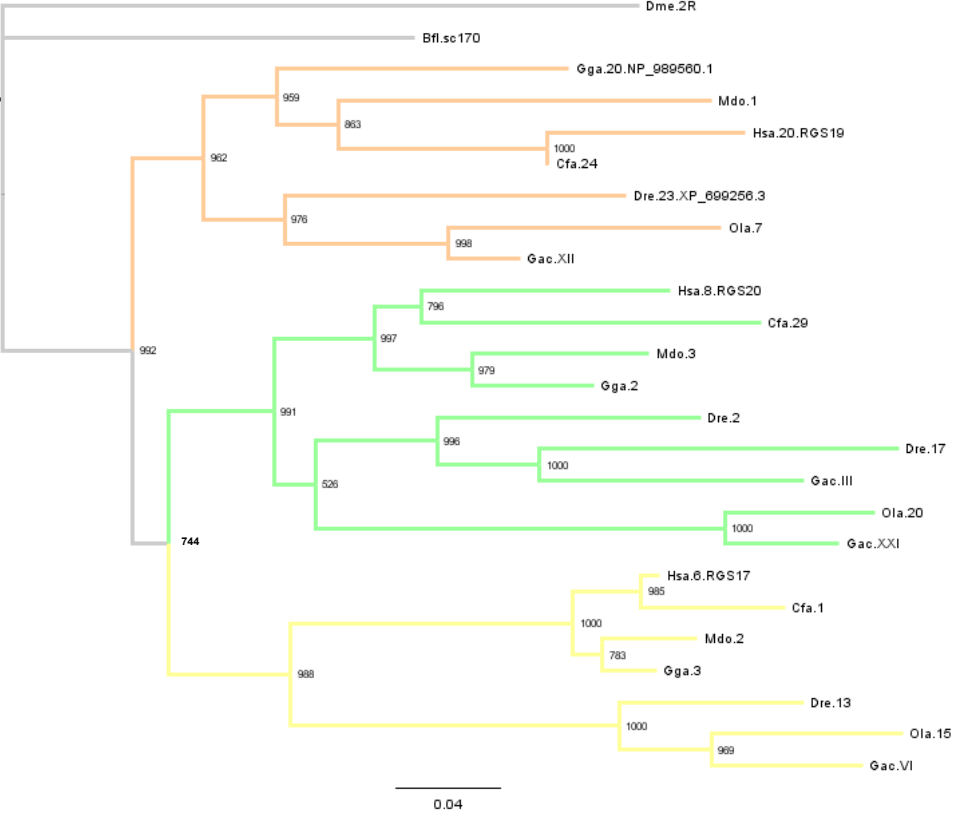

RGS, QP

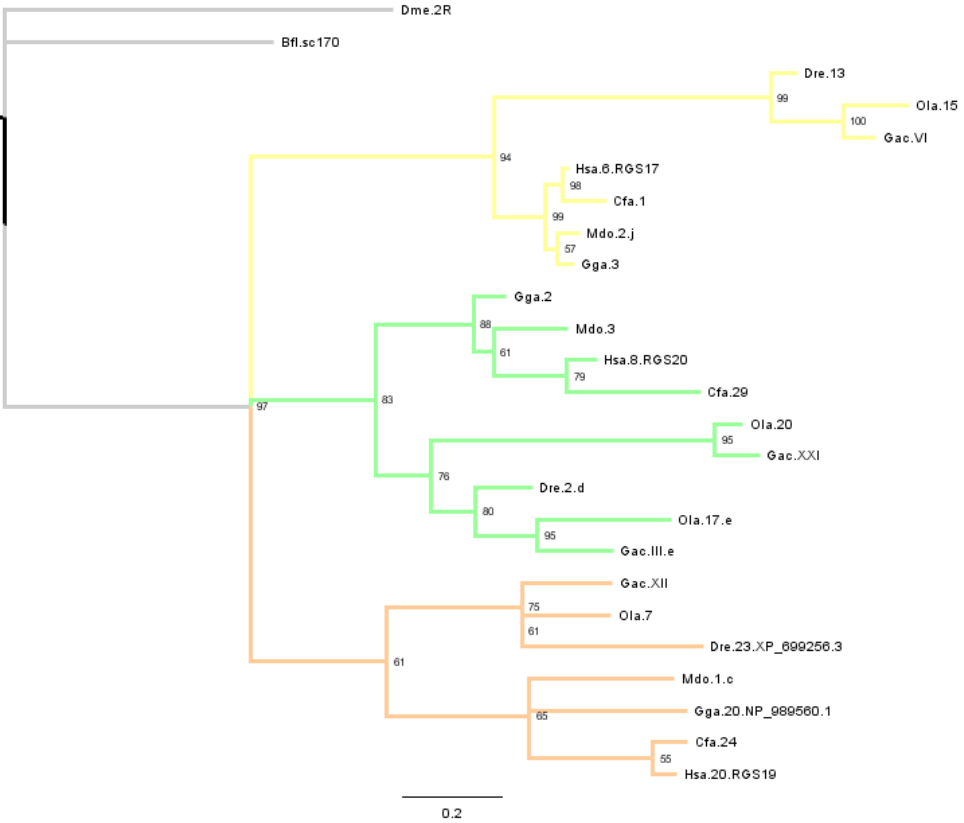

RIMS, NJ

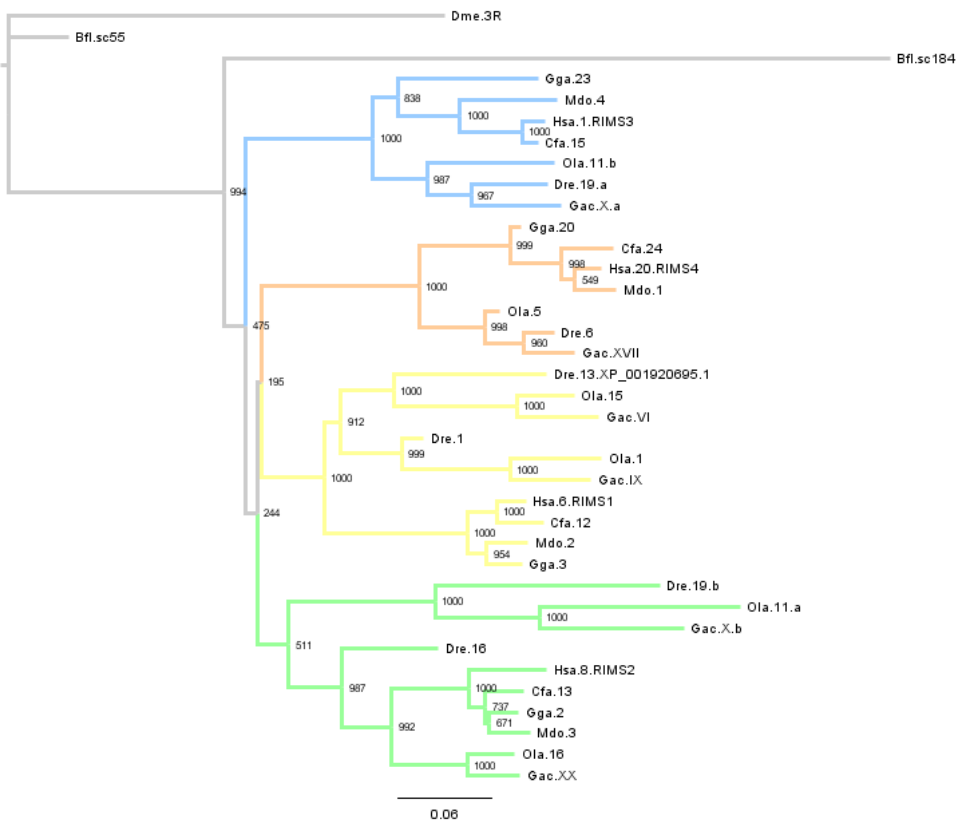

RIMS, QP

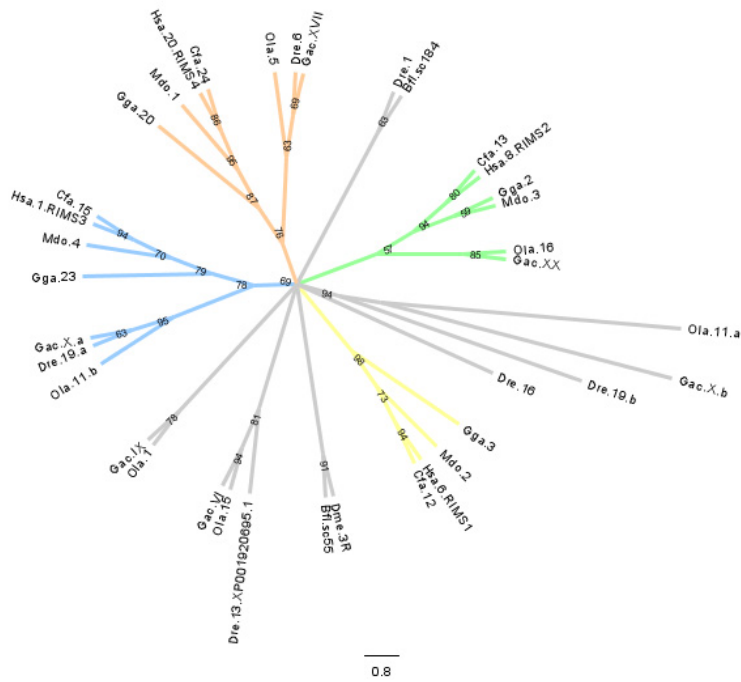

RSPO, NJ

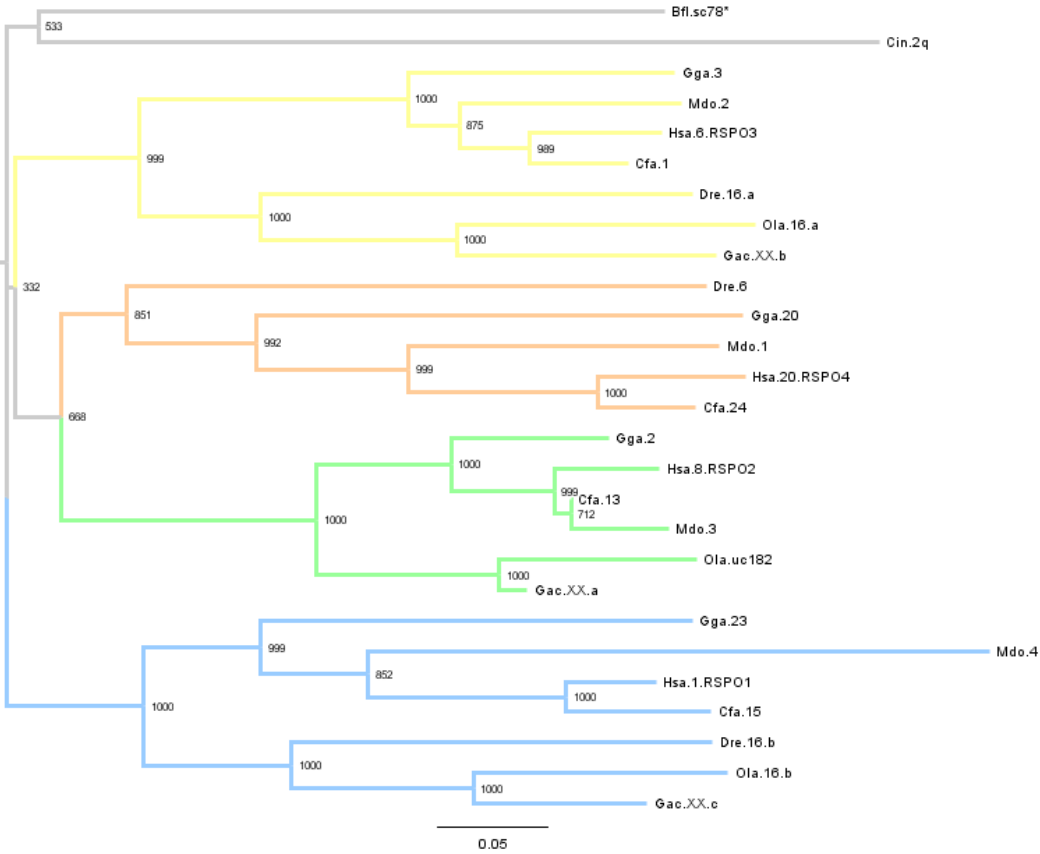

RSPO, QP

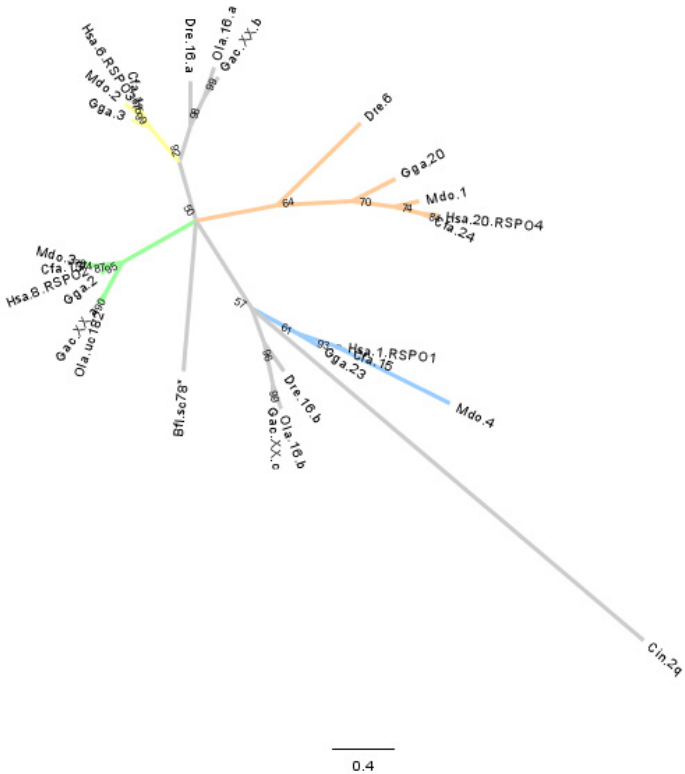

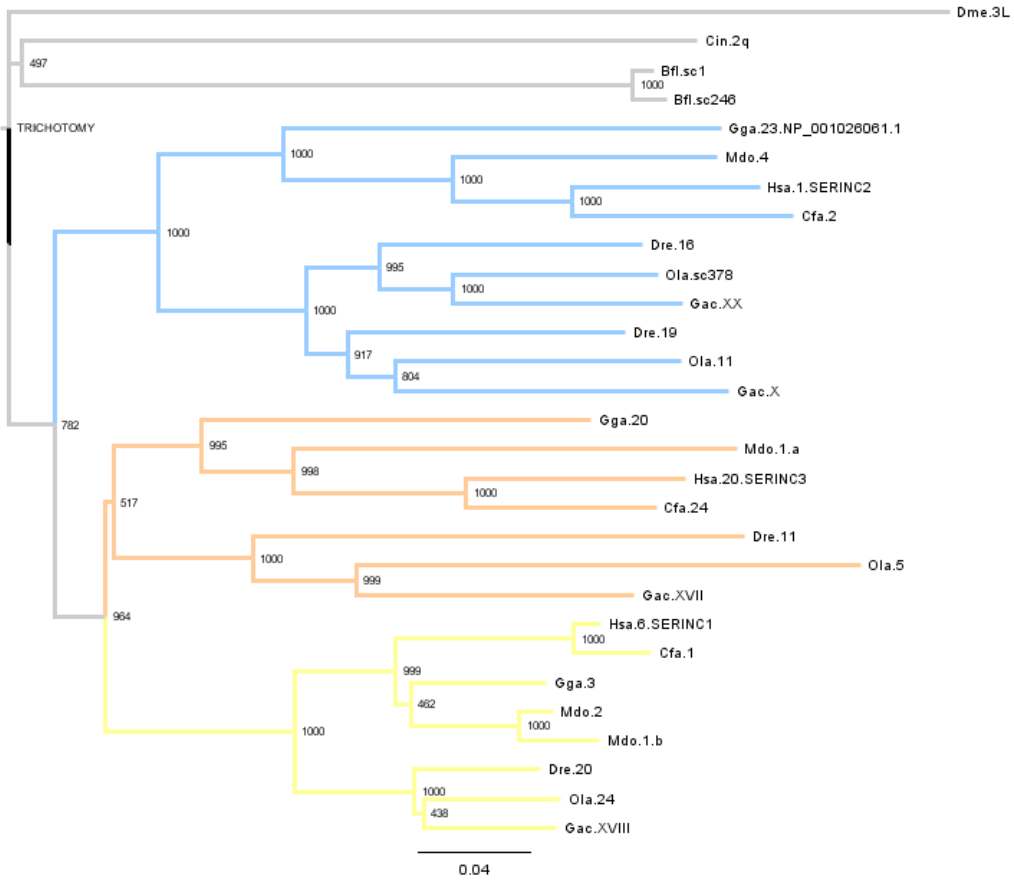

SERINC, NJ

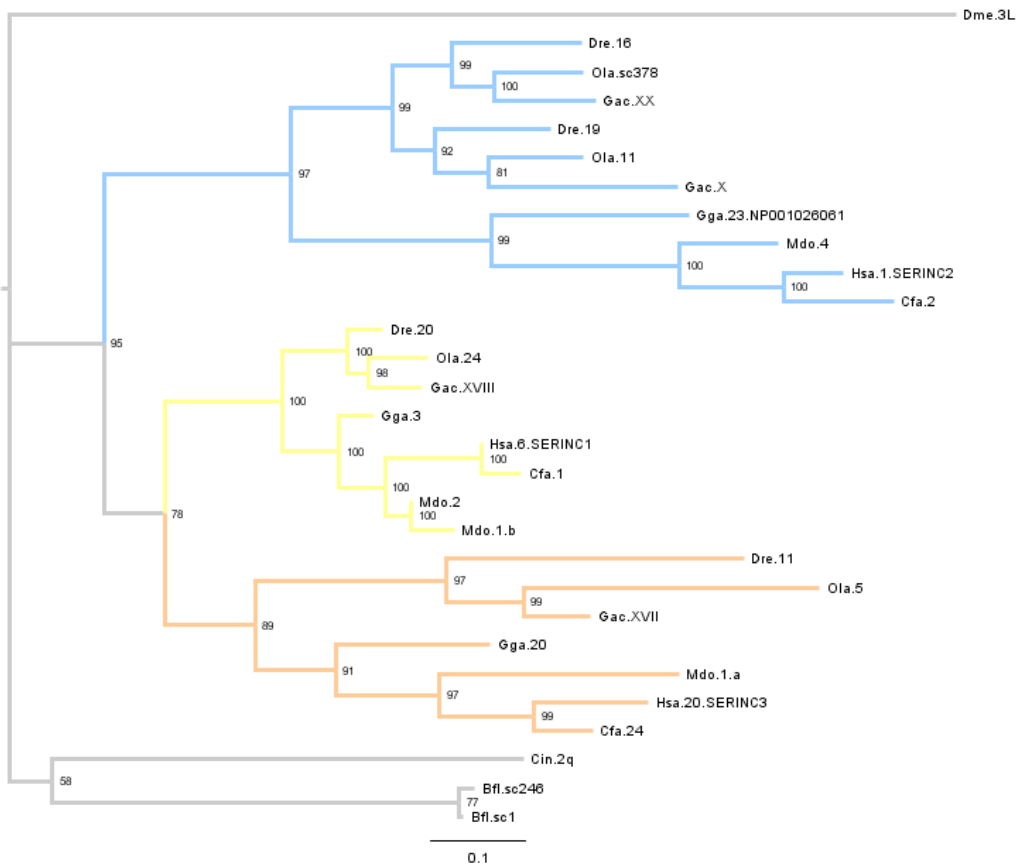

SERINC, QP

SRC-B, NJ

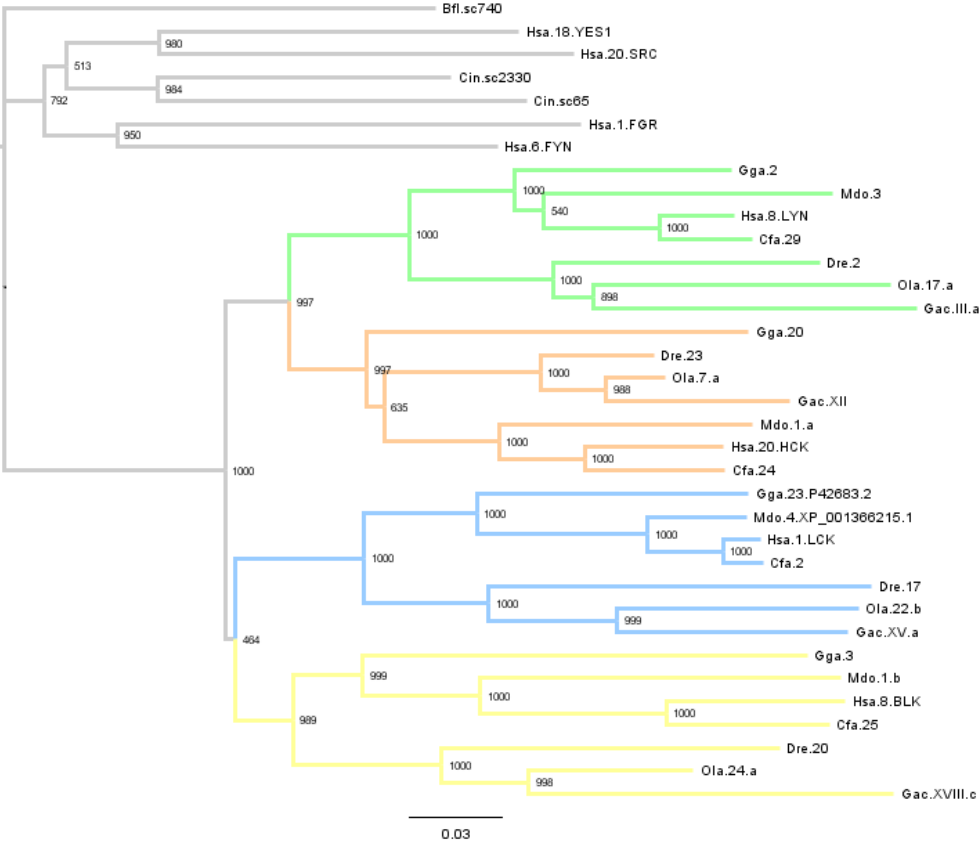

SRC-B, QP

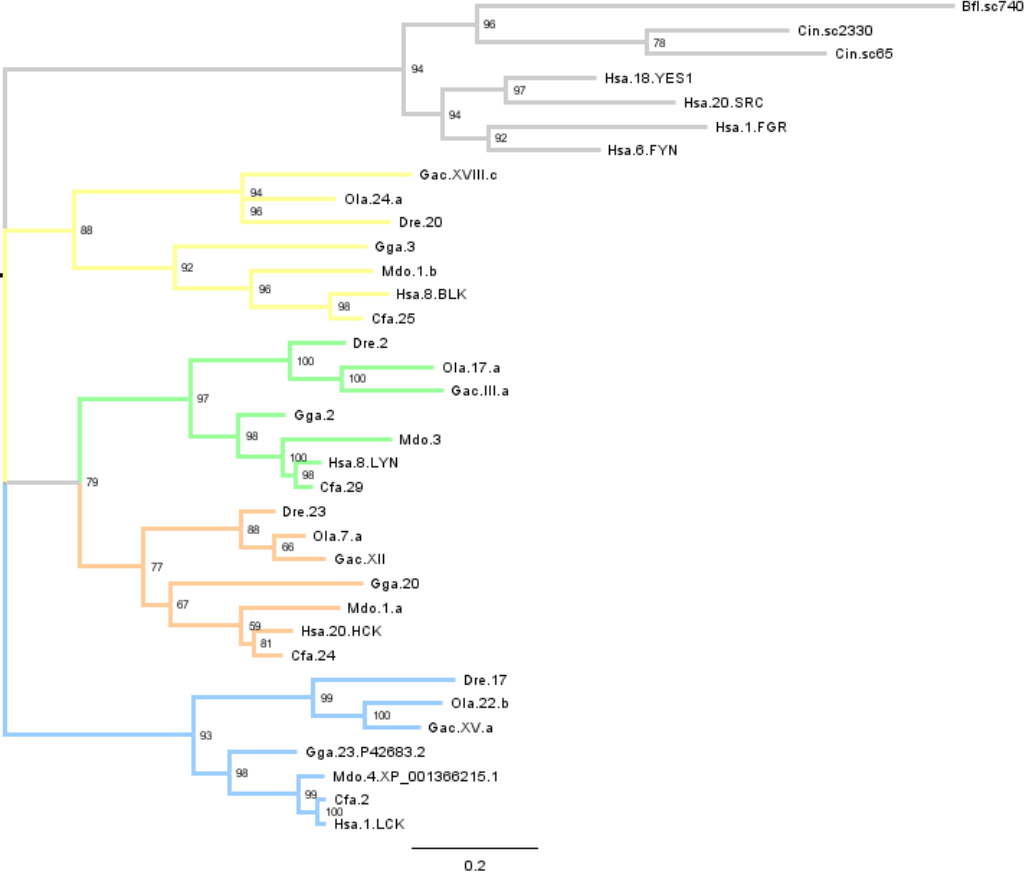



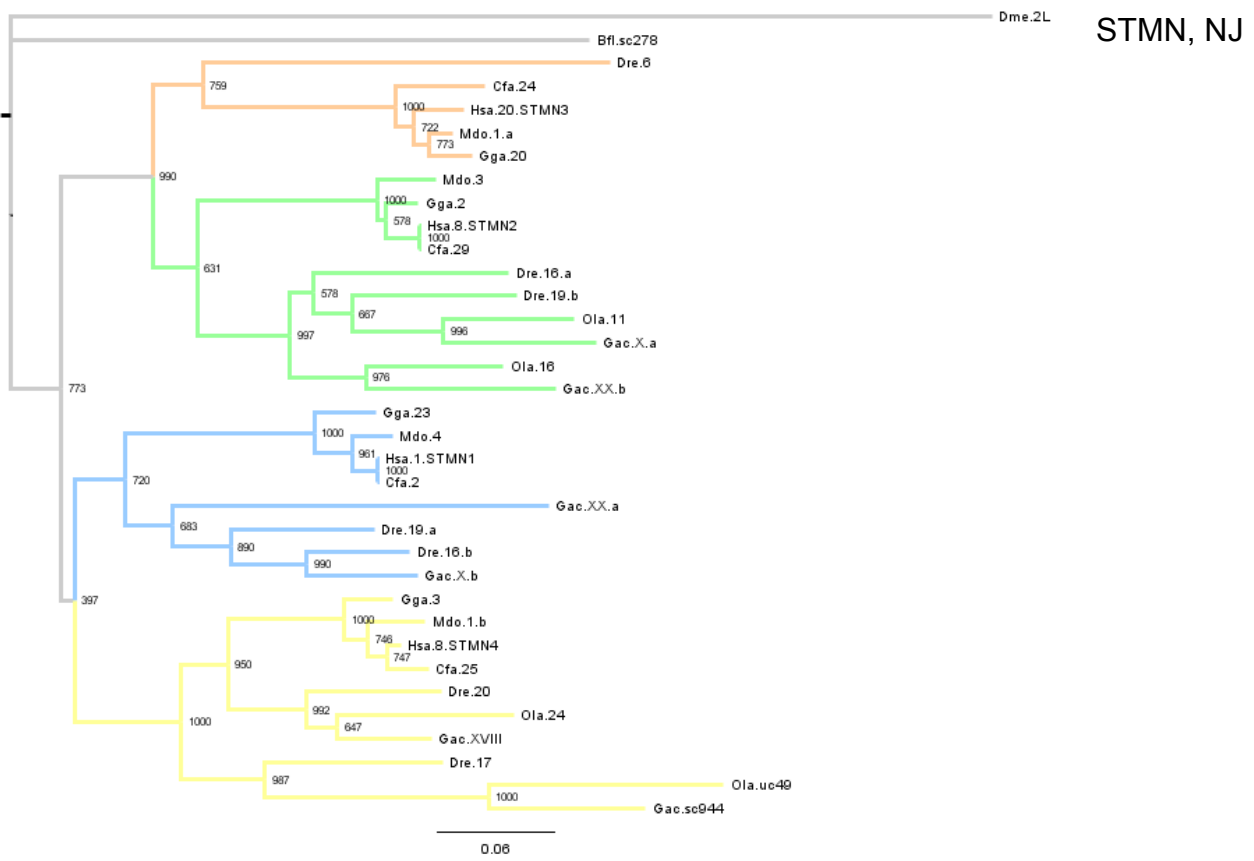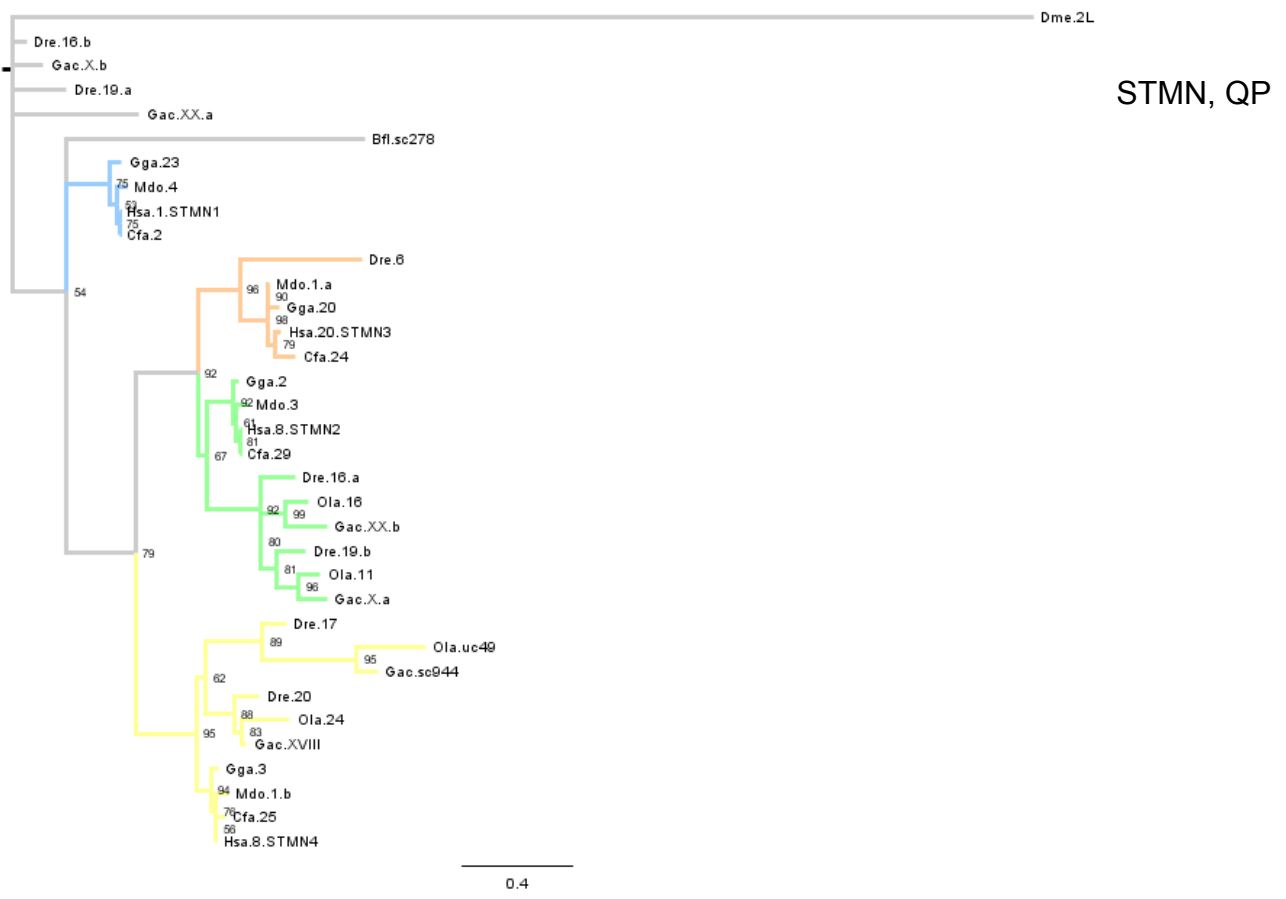

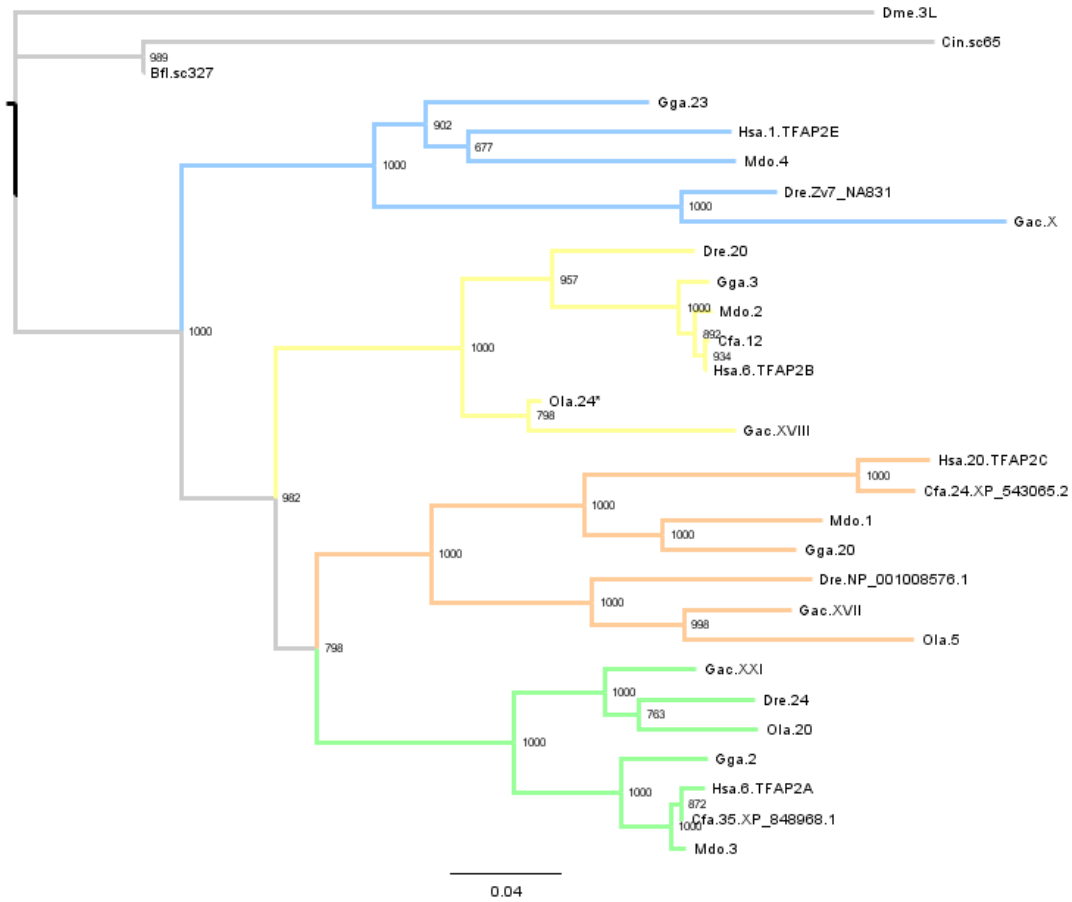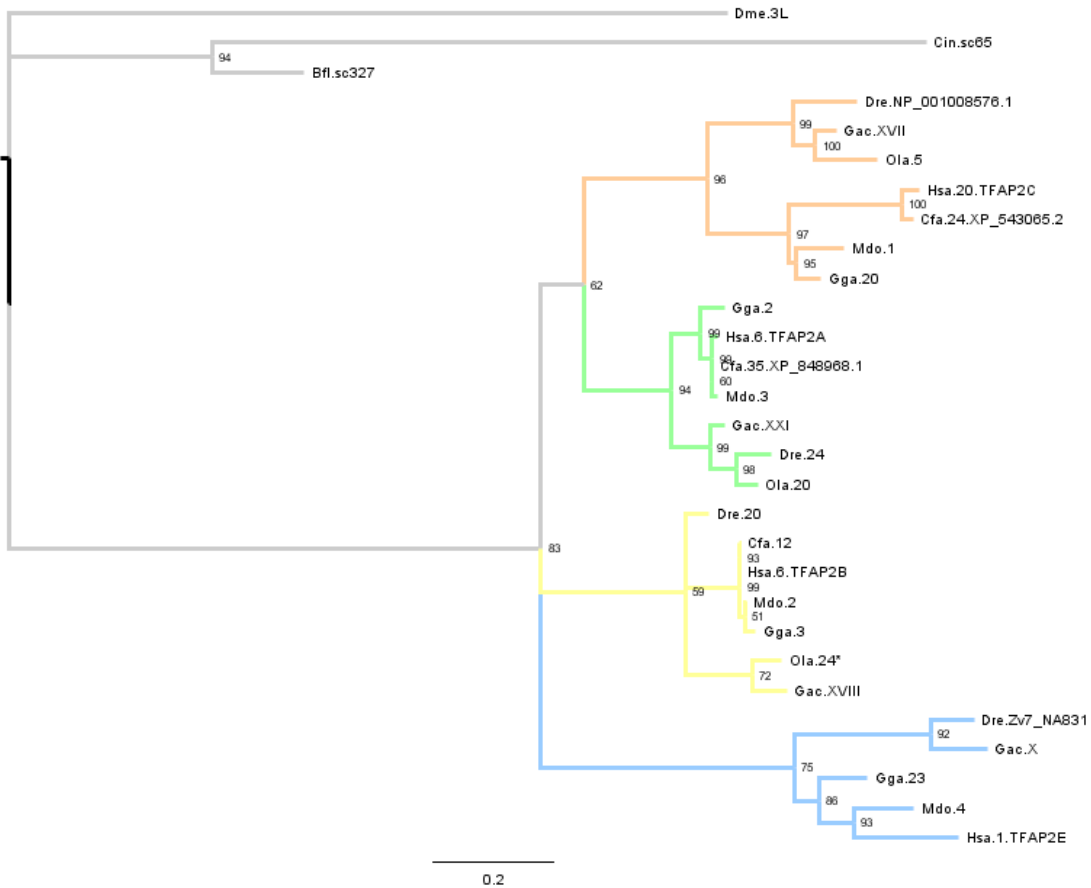

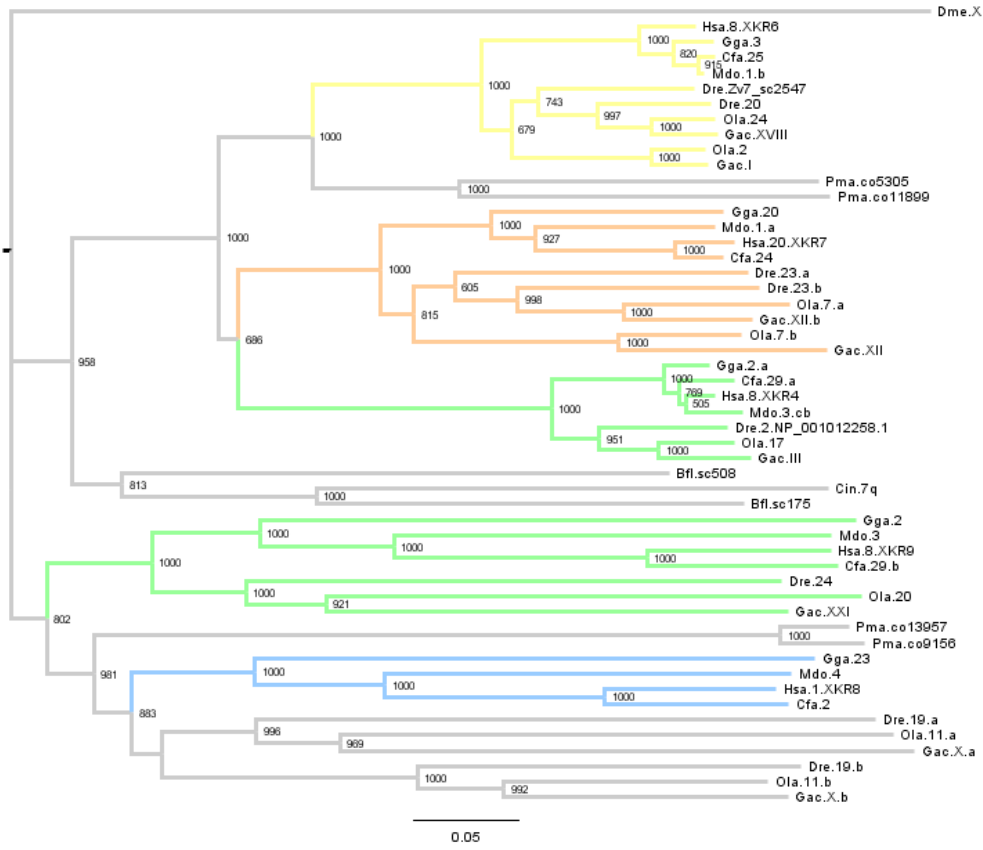

XKR, NJ

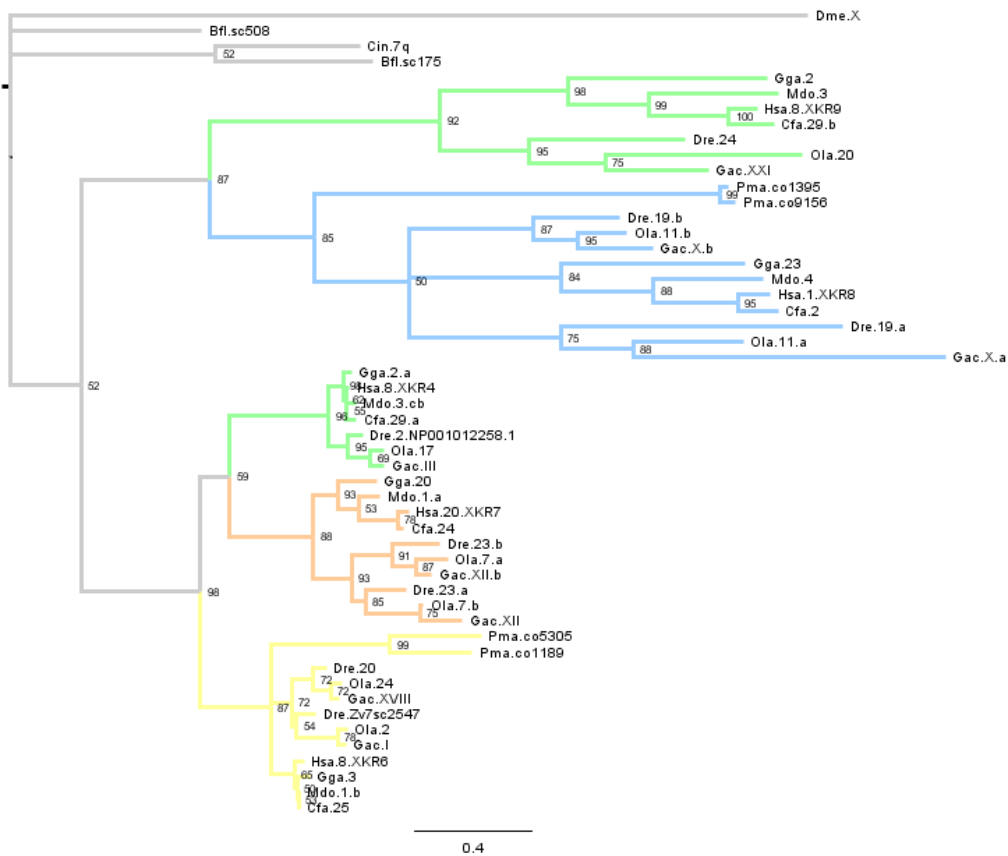

XKR, QP

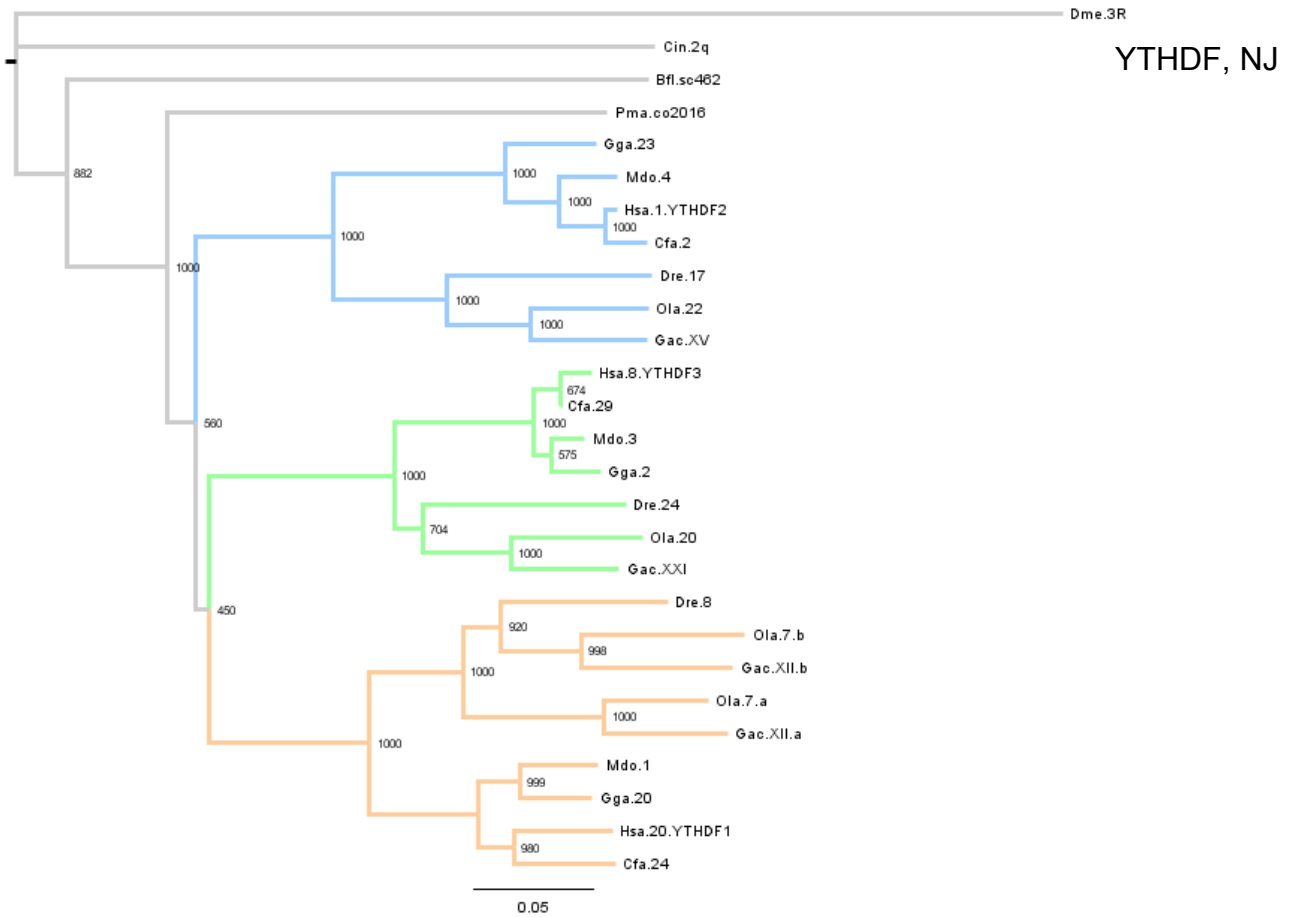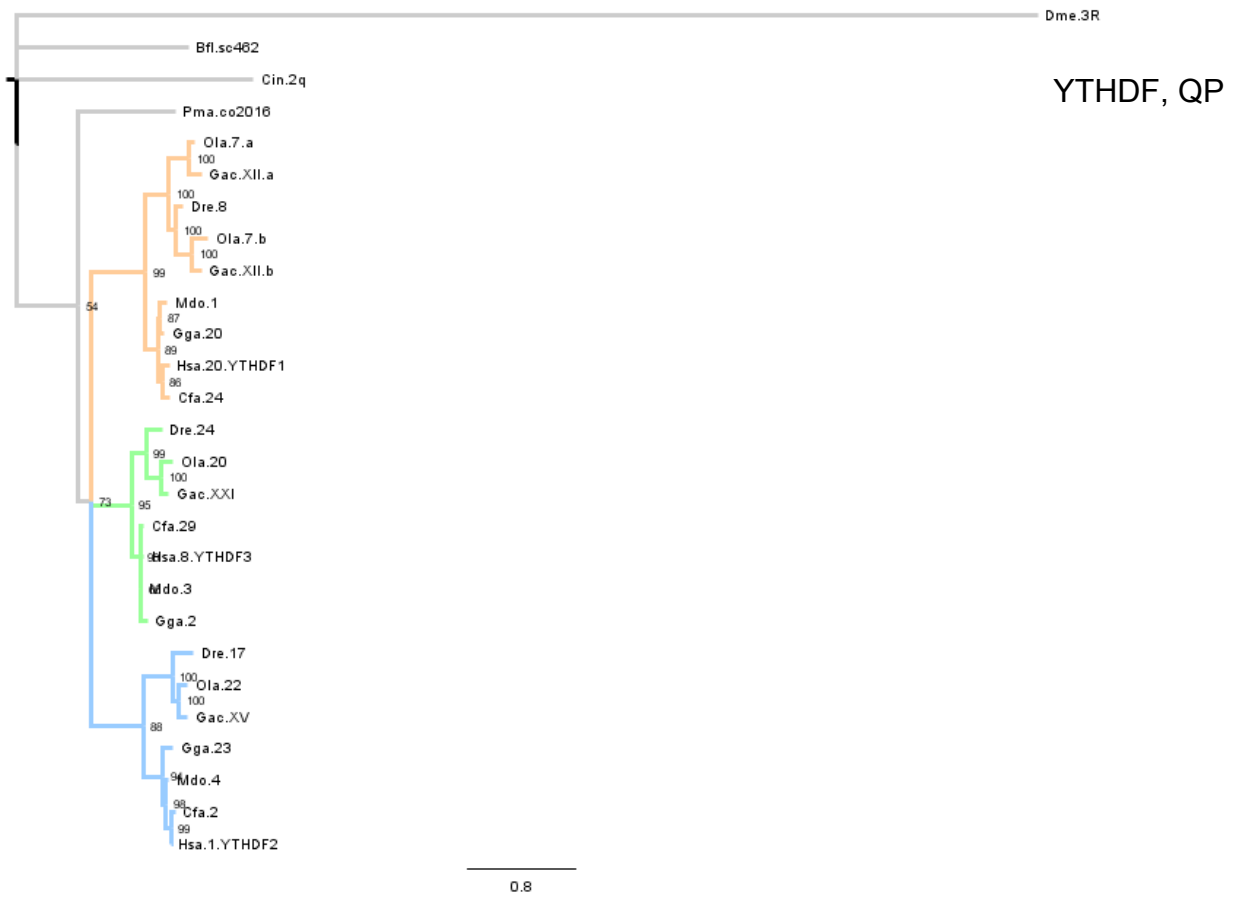

Supplement: pone.0010512.s004.pdf [file pone.0010512.s004.pdf]
