# Supplementary material for: Concomitant Duplications of Opioid Peptide and Receptor Genes before the Origin of Jawed Vertebrates
Source: PubMed Central journal article supplement (PMC2865548; doi:10.1371/journal.pone.0010512), 2010-05-06
Supplement: pone.0010512.s003.pdf [file pone.0010512.s003.pdf]

|                         |                                                                               |
|-------------------------|-------------------------------------------------------------------------------|
|                         | . . . .   . . . .   . . . .   . . . .   . . . .   . . . .   . . . .   . . . . |
| <b>HumanPENK</b>        | - - MARFLT - LCTWLLLLGPGLLATVRAECSQDCATCSYRL                                  |
| <b>MousePENK</b>        | - - MARFLR - LCTWLLALGSCLLATVQAECSSQDCAKCSYRL                                 |
| <b>DogPENK</b>          | - - MARLLRLLCAWLLALGPGLLATVRRECGQDCTTCSYRL                                    |
| <b>OpossumPENK</b>      | - - MALFLR - LCSLLLLALSPGLFLTIRAECSSKDCTSCTYRL                                |
| <b>ChickenPENK</b>      | - - MALLLR - LGCSLLALSTCLLPRARADCGRDCAACAYRL                                  |
| <b>S.tropicalisPENK</b> | - - MGLGAR - RCCFFLLMFASLSVAIRADCTKDCASCALHL                                  |
| <b>ZebrafishPENKa</b>   | - MKTLTVPISCRWTL LLSACLTLTARADCGEDCAYCLQQM                                    |
| <b>MedakaPENK</b>       | - - - - - - - - - - - - - - - - - - - - - - - - - - - - -                     |
| <b>SticklebackPENK</b>  | MAAPAHSSCVWILVVLVGACVSQVVGTECGKECALCVYRL                                      |
| <b>ZebrafishPENKb</b>   | - - MALMMN - - SWWTVALSACLVL MVR AECGRDCALCVYRL                               |
| <b>HumanPDYN</b>        | - - - - - MAWQGLVLAACL LMFPS - TTADCLSRCSLCAVKT                               |
| <b>MousePDYN</b>        | - - - - - MAWSRLMLAACLLVMPSNVMADCLSLC SLCAVRI                                 |
| <b>DogPDYN</b>          | - - - - - MAWQGLLLAACLLVLP S - ATADCLSQCSLCAVKT                               |
| <b>OpossumPDYN</b>      | - - - - - MKWHIMILLCLSAFPS - VSADCPAQCSMCAVQT                                 |
| <b>Zebra finchPDYN</b>  | - - - - - - - - - - - - - - - - - - - - - - - - - - - - -                     |
| <b>S.tropicalisPDYN</b> | - - - - - - - - - - - - - - - - - - - - - - - - - - - - -                     |
| <b>ZebrafishPDYN</b>    | - - - - - MMEWYV LVLMLS - - - FPTLSQADCSAQCLRCAQQI                            |
| <b>MedakaPDYN</b>       | - - - - - MEWYV LVLMLS - - - LPPSIHADCSSLCQRCAEQM                             |
| <b>SticklebackPDYN</b>  | - - - - - MEWYV LVLMLS - - - FPSSLRADCSLQCQKCVQRI                             |
| <b>HumanPNOC</b>        | - - - - - MKVLLCDLLLLSLFSSV - - FSSCQRDCLTCQEKL                               |
| <b>MousePNOC</b>        | - - - - - MKILFCDVLLLSLSSV - - FSSCPRDCLTCQEKL                                |
| <b>DogPNOC</b>          | - - - - - MKILLCDLLLLSLFSSV - - SGSCQKDCLTCREKL                               |
| <b>OpossumPNOC</b>      | - - - - - MKTLLCDLLLLLGLFSNV - - FSDCQKDCLTCREKL                              |
| <b>ChickenPNOC</b>      | - - - - - MRAVLWDLLLLCLFARA - - RSDCRGDCLRCDRHF                               |
| <b>S.tropicalisPNOC</b> | - - - - - MMKALQWNIVLLCLLGHV - - LCDCQKDCMTCNKHL                              |
| <b>ZebrafishPNOCa</b>   | - - - - - MKAPLWTL LLLGLCNPA - - WCDCQKDCFLC SQKL                             |
| <b>MedakaPNOCa</b>      | - - - - - MRT - VVAL LFLCLCD - - PGHSDCQADCLSCNNIL                            |
| <b>SticklebackPNOCa</b> | - - - - - MKT - VVAL LLLCLCD - - PGQSDCQADCVSCSNML                            |
| <b>ZebrafishPNOCb</b>   | - - - - - MKTPFWTL LLLCLCASS - - HSDCQGDCLTCGLIL                              |
| <b>MedakaPNOCb</b>      | - - - - - MKIPLWCLV VLLACL FSPGHCD CQGE CVACGLLL                              |
| <b>SticklebackPNOCb</b> | - - - - - MKIPVWYLLV LLASVFTPGRGD CQGE CVACGALL                               |
| <b>HumanPOMC</b>        | - - - - MPRSCCSRSGALL LALLLQASMEVRG - WCLESSQCQ                               |
| <b>MousePOMC</b>        | PRFCYSRSGALL LALLLQTSIDVWS - WCLESSQCQDLTT -                                  |
| <b>DogPOMC</b>          | - - - - MPRSCCSRPGALL LALLLQASVEVSG - WCLESSQCQ                               |
| <b>OpossumPOMC</b>      | - - - - MPKPSWSYLGALL VAVLFQASVEVHG - WCLQASNCR                               |
| <b>ChickenPOMC</b>      | - - - - MRGALCHSLPVV LGLLLCHPT - TASG - PCWENSKCQ                             |
| <b>S.tropicalisPOMC</b> | - - - - MFRPLWGCSLA I LGAFIFHVG - EVQG - QCWESSRCA                            |
| <b>ZebrafishPOMCa</b>   | - - MVRGVRMLCPAWLL ALAVLCAGGSEVRA - QCWENARCR                                 |
| <b>MedakaPOMCa</b>      | - - - - - MYTVWLLVAVVV VGGAE GAVG - QCWKHSSCQ                                 |
| <b>SticklebackPOMCa</b> | - - - - - MYPAWLLV VVAVMGVAGGDVS - LCWEHPSCQ                                  |
| <b>ZebrafishPOMCb</b>   | - - - - - MFCPSWLLAAAVLCFHSPHVDGGRC SGLIDCM                                   |
| <b>MedakaPOMCb</b>      | - - - - - MVS LCWLLV VLMGCMCATGS - - - - TNSIVN                               |
| <b>SticklebackPOMCb</b> | - - - - - MVSLSWLLV VAVACARLP GFSGS - ACLDRSQCD                               |

```

. . . . | . . . . | . . . . | . . . . | . . . . | . . . . | . . . . | . . . . |
HumanPENK VRPA - - - D I N F L A C V M E C E G K L P S L K I W E T C K E L L Q L S K P
MousePENK VRPG - - - D I N F L A C T L E C E G Q L P S F K I W E T C K D L L Q V S R P
DogPENK ARPS - - - D L N P - A C T L E C E G K L P S L K T W E A C K E L L Q L S K L
OpossumPENK GQHA - - - D I N P L A C T L E C E G K L P S A K A W D T C K E L L Q L T K M
ChickenPENK GPRA - - - D I H P L A C T L E C E G K L P S A K A W E T C K E L L Q L T K L
S.tropicalisPENK GQQT - - - E I N S L A C T L E C E G K L P S A K A W G T C K E L L Q L T K V
ZebrafishPENKa PLQLK - - - H L N S I E C V L E C E E Q P N A G S S W S Q C K H F M Q N A D -
MedakaPENK - - - - - - - - - - - - - - - - - - - - - - - - - - - - - - - - - - - - -
SticklebackPENK LAQQS - - - G F S S P T C S L E C K G G L D T Q K - L R L C R D F L I E E E H
ZebrafishPENKb LRQT - - - D I D T L A C T L E C E G S V D S R K - I E I C K N I L T E E D -
HumanPDYN QDGPk - - - P I N P L I C S L Q C Q A A L L P S E E W E R C Q S F L S - - - -
MousePDYN QDGPR - - - P I N P L I C S L E C Q D L V P P S E E W E T C R G F S S - - - -
DogPDYN QDRPK - - - P I E P L I C S L E C Q A A L L P A E E W E R C Q S L L S - - - -
OpossumPDYN QDLdk - - - P I N P L T C F L E C Q T I L T T T T E W D K C K S F L S - - - -
Zebra finchPDYN - - - - - - - - - - - - - - - - - - - - - - - - - - - - - - - - - - - -
S.tropicalisPDYN - - - - - - - - - M Q V C S L Q C E G S L L P D D E W E R C G Q L L S - - - -
ZebrafishPDYN SDLDS - - - A V N R L T C T L E C E G A V P P T G T L D R C E K A L Q G L S D
MedakaPDYN LRSDA - - - A F G S L S C S E E C D - - - - - - - - - T D S C E P T P R - - - -
SticklebackPDYN LGPNA - - - A F S S L S C S A Q C D G - - - - - - - - - Q L E S C Q R A P A - - - -
HumanPNOc HPAL - - - D S F D L E V C I L E C E E K V F P S P L W T P C T K V M A R S S -
MousePNOc HPAL - - - D S F N L K T C I L Q C E E K V F P R P L W T V C T K V M A S G S -
DogPNOc HPAL - - - D S F N L E V C I L E C E G K V F S S P L W T P C T K V M A R S S -
OpossumPNOc HPFL - - - D N F S V D E C I T D C E G Q V F L S P F W A P C T K A M N K G P -
ChickenPNOc YR - - - D G F D L L V C I L E C E G E A V P R A T W E M C A T S I R S - - A
S.tropicalisPNOc YQQ - - - D N F N T L L C I V E C E G K I Y S S S M W S I C K T V L V Q S S -
ZebrafishPNOCa PNE - - - Y A F N N L V C L V E C H G K L S P G D T W E M C R R T I V E Q K P
MedakaPNOCa SKH - - - L S F D P T V C L I E C E G N L S P S F Y W N F C Q T T L T S - - -
SticklebackPNOCa PRQ - - - L S F N P M V C L T E C E A D V S P N F F W D F C G K V L S S - - -
ZebrafishPNOCb PEH - - - Q A F N T L V C I L E C E A Q A S P A L T W D L C Y Q A A G L K H -
MedakaPNOCb QQHQLQQA F N T I V C L L E C E G H A S S S L T W E V C K R A L K H - - -
SticklebackPNOCb QQQQLPQA F N A L V C F L E C E G G V S S S F T W E V C Q R A M K L S R -
HumanPOMc DLTT - - - E S N L L E C I R A C K P D L S A E T P M F P G N G D E Q P L T E
MousePOMc - - E S N L L A C I R A C K L D L S L E T P V F P G N G D E Q P L T E N P R K Y
DogPOMc DLTT - - - E S N L L A C I R A C K P D L S A E T P V L P G N G D E Q P L A E
OpossumPOMc DSKA - - - E D G L V E C I K S C K M D L S A E S P V F P G N G Q Y E P L S E
ChickenPOMc DLAT - - - E A G V L A C A K A C H A E L S A E A P V Y P G N G H L Q P L S E
S.tropicalisPOMc DLSS - - - E D G V L E C I K A C K M D L S A E S P V F P G N G H L Q P L S E
ZebrafishPOMCa DLST - - - E E N I L E C I Q L C R S E L T D E T P V Y P G E S H L Q P P S E
MedakaPOMCa ELDS - - - E S S M T E C L Q L C R S D L T A E T P L I P G S S H L Q P P P P
SticklebackPOMCa DVNS - - - E T S M M E C V E L C R S D L T A E A P V V P G A A H L Q P P P P
ZebrafishPOMCb DLES - - - N E H K L Q C L R K C R S D Q E S S R N I R V S S S E H Q S S E E
MedakaPOMCb DLNR - - - K N R I L D C V H L C M S G I K P E S P D L G - - G S V L P P K N
SticklebackPOMCb ELNG - - - E G E T Q D C I R R C V S A V Q P E A P R L G - - A L A L E V S G

```

|                         |                                                                                 |
|-------------------------|---------------------------------------------------------------------------------|
|                         | . . . .   . . . .   . . . .   . . . .   . . . .   . . . .   . . . .   . . . .   |
| <b>HumanPENK</b>        | ELPQDGTSTL - - - - - R E N S K P E E S H L L A K R Y                            |
| <b>MousePENK</b>        | EFPWDNIDMY - - - - - K D S S K Q D E S H L L A K K Y                            |
| <b>DogPENK</b>          | ELPQDGATAL - - - - - R E T S K P E E S H A L A K K Y                            |
| <b>OpossumPENK</b>      | DLSQEGTNNQ - - - - - E E S K - Q D D S H L L A K K Y                            |
| <b>ChickenPENK</b>      | DLPEDGNAAP - - - - - G D K K E L D E N H L L A K K Y                            |
| <b>S.tropicalisPENK</b> | DSVQDG - - - - - E K Y Q D N N D S H Y A A K K Y                                |
| <b>ZebrafishPENKa</b>   | NSPEGNRAAT - - - - - Q I E H S N S Q Q H Q V D K K Y                            |
| <b>MedakaPENK</b>       | NFLLDADLQTPQKGEA - - - - A I M P D E D A A A P P Q E M D Q K F                  |
| <b>SticklebackPENK</b>  | N I P L N A D P L Q P Q D Q E A S D E - - A T A D E D D S P S P Q H L L A K K Y |
| <b>ZebrafishPENKb</b>   | R L A I D S - - - - - L K Q D E E S A N H V L A K K Y                           |
| <b>HumanPDYN</b>        | FFTPSTLGLN - - - - - D K E D L G S K S V G - E G P Y                            |
| <b>MousePDYN</b>        | FLTLTVSGLR - - - - - G K D D L E D E V A L - E E G Y                            |
| <b>DogPDYN</b>          | FFTPFTFGLN - - - - - G K E D W E T K A T L - E E P Y                            |
| <b>OpossumPDYN</b>      | LFTP F M L G L H - - - - - G K G E V G D M S M A S Q E P Y                      |
| <b>Zebra finchPDYN</b>  | - - - - -                                                                       |
| <b>S.tropicalisPDYN</b> | - S Q E E V L E V K - - - - - R E Q E L V P - P M L - - D S Q                   |
| <b>ZebrafishPDYN</b>    | D L A E L N T G A D - - - - - G E T N A L N T D E D L Q E K T                   |
| <b>MedakaPDYN</b>       | - L A D F T Q D V A - - - - - A E A - - - - - E E S Q Q - -                     |
| <b>SticklebackPDYN</b>  | - L A D F S Q D E A - - - - - A E E - - - - - E E H Q Q - -                     |
| <b>HumanPNOC</b>        | W Q L S P A A P - - - - - E H V A                                               |
| <b>MousePNOC</b>        | G Q L S P A D P - - - - - E L V S                                               |
| <b>DogPNOC</b>          | W Q L S P A A P - - - - - E H V A                                               |
| <b>OpossumPNOC</b>      | W Q L S L A S K - - - - - D E A M                                               |
| <b>ChickenPNOC</b>      | P R L G A T G A G - - - - - V L G A M E P                                       |
| <b>S.tropicalisPNOC</b> | L Q L S V D S V G G - - - - - F Q E D Y K P I N M E D G Q F A S                 |
| <b>ZebrafishPNOCa</b>   | K A L L S V E G S I - - - - - L K R A E E E P - - - - - D T S L                 |
| <b>MedakaPNOCa</b>      | - P I S T I N S S I - - - - - K K R S R E E A - - - - - E A L F                 |
| <b>SticklebackPNOCa</b> | - P I S T L A G T I - - - - - Q K R S R E E V - - - - - E A L F                 |
| <b>ZebrafishPNOCb</b>   | L P L P L Q D E E T - - - - - S K R S D - - - - -                               |
| <b>MedakaPNOCb</b>      | Q E T L Q E G G A F - - - - - L K R G G E Q L K L T S E D L N S                 |
| <b>SticklebackPNOCb</b> | R P S L P G G G A V - - - - - L G R T G E G L E L T Y L D M N P                 |
| <b>HumanPOMC</b>        | N P R K Y V M G H F R - - - - - W D R F G R R N S S S S G S S G A G -           |
| <b>MousePOMC</b>        | V M G H F R - - - - - W D R F G P R N S S S A G S A A Q R - - - - R A           |
| <b>DogPOMC</b>          | N P R K Y V M G H F R - - - - - W D R F G R R N - - - - G S A G Q K -           |
| <b>OpossumPOMC</b>      | N I R K Y V M S H F R - - - - - W N K F G R R N I S S G S I S S D G G           |
| <b>ChickenPOMC</b>      | S I R K Y V M S H F R - - - - - W N K F G R R N S - - - - S S G G -             |
| <b>S.tropicalisPOMC</b> | S I R K Y V M T H F R - - - - - W N K F G R R N S T G N D G S S S G -           |
| <b>ZebrafishPOMCa</b>   | - - - - -                                                                       |
| <b>MedakaPOMCa</b>      | - - - - -                                                                       |
| <b>SticklebackPOMCa</b> | - - - - -                                                                       |
| <b>ZebrafishPOMCb</b>   | - - - - -                                                                       |
| <b>MedakaPOMCb</b>      | - - - - -                                                                       |
| <b>SticklebackPOMCb</b> | - - - - -                                                                       |



|                         |                                                                               |
|-------------------------|-------------------------------------------------------------------------------|
|                         | . . . .   . . . .   . . . .   . . . .   . . . .   . . . .   . . . .   . . . . |
| <b>HumanPENK</b>        | SEILAKRYGGFMKKDAEEDDSLANS SD - LLKELLETDGDNR                                  |
| <b>MousePENK</b>        | GEILAKRYGGFMKKDAEGDTLANS SD - LLKELLGTGDNR                                    |
| <b>DogPENK</b>          | GEVLAKRYGGFMKKNGEEEDVLANS SD - LLKELLGTGENR                                   |
| <b>OpossumPENK</b>      | GEVLAKRYGGFMKKDSDD - DALANS SDLLLKELLGTGDNS                                   |
| <b>ChickenPENK</b>      | GEILAKRYGGFMKKDSDD - DALANS SD - LLKELLGAGDNP                                 |
| <b>S.tropicalisPENK</b> | GEILAKKRYGGFMKK - - EYDSRDASD - LLRELLATSGDP                                  |
| <b>ZebrafishPENKa</b>   | RAILTN - - - - - HDVEMLANQVE - - - - - ADGER                                  |
| <b>MedakaPENK</b>       | - - - - - QEEENIRLEILKLFSTA                                                   |
| <b>SticklebackPENK</b>  | - - - - - QDEEESVRLEILKILNAA                                                  |
| <b>ZebrafishPENKb</b>   | TGAISKKYGGFMKK - - - ADDGAEDQQVELLREILRVGLSS                                  |
| <b>HumanPDYN</b>        | S - - LEEKLRGLSDGFRGAESELMRDAQLNDGAMETGTLY                                    |
| <b>MousePDYN</b>        | - - - - EEKFRGLSSSFGNGKESELAGADRMNDEAAQAGTLH                                  |
| <b>DogPDYN</b>          | S - - LAEKLRGLSGRLGEGGESELMGDTQLNDDAMEAGALD                                   |
| <b>OpossumPDYN</b>      | G - - PSHKYGELAPKLGERRAISEMTEDEQQYHRALETGELG                                  |
| <b>Zebra finchPDYN</b>  | - - - - -                                                                     |
| <b>S.tropicalisPDYN</b> | N - - FSKRYGGFLRKYTLRDLDPVSSNPEAKLES PDAAEELG                                 |
| <b>ZebrafishPDYN</b>    | G - LFAKKYGESLSKLGGERDLPSITEDDEGEDMGAENETGV                                   |
| <b>MedakaPDYN</b>       | AATLPRKYEDWLKRLDARD - - - - ADAPQYADDSAEERLL                                  |
| <b>SticklebackPDYN</b>  | AGALPEKYEDLLKRLEERD - - - - AGEP - - - - - AGDRAL                             |
| <b>HumanPNOC</b>        | - - - - - EPEPGMEEAGEMEQQQLQ - - - - -                                        |
| <b>MousePNOC</b>        | PGADAEPGADAEFGADDAEEVEQKQLQ - - - - -                                         |
| <b>DogPNOC</b>          | - - - - - EGTEPGMDEAGEIEQKQLQ - - - - -                                       |
| <b>OpossumPNOC</b>      | AQ - - - - - EEEAAEGLGEAGEEMQKQLQ - - - - -                                   |
| <b>ChickenPNOC</b>      | - - - - - AEDGGAGMAPGAFPSQ - - - - -                                          |
| <b>S.tropicalisPNOC</b> | - - - - - DISDLIREQSEEDPSLDGAEGALGMAAYPD                                      |
| <b>ZebrafishPNOCa</b>   | ADDQD - - - - RQLSKKY - - - - - KFLQVQS - AQESEEERD                           |
| <b>MedakaPNOCa</b>      | INEKDLGDESNQLNTAY - - - - - KSLNALSLENEYDEQEG                                 |
| <b>SticklebackPNOCa</b> | LDER - - - - - HQLNTAH - NAPNAPSLEDEYEEDAGQEEGG                               |
| <b>ZebrafishPNOCb</b>   | PSEELEKLTAS - - - - - YDPDLDPRTQEDQDDLQ - - - - -                             |
| <b>MedakaPNOCb</b>      | ESSE - EVQS - - - - - LDPRLGKEETQRDDRDRVKG                                    |
| <b>SticklebackPNOCb</b> | ESSEGEEVEEEGEEGPLGWHPSLSDGEGMPREERNVGS DG                                     |
| <b>HumanPOMC</b>        | PREGKRSYSMEHFRWGKPVGKKRRRPVKVYP - NGAEDESA E                                  |
| <b>MousePOMC</b>        | RSYSMEHFRWGKPVGKKRRRPVKVYP - NVAENESA E - - - - -                             |
| <b>DogPOMC</b>          | LQEGKRSYSMEHFRWGKPVGKKRRRPVKVYP - NGAEDESA E                                  |
| <b>OpossumPOMC</b>      | ELQNKRSYSMEHFRWGKPVGKKRRRPVKIYP - NGVEEESA E                                  |
| <b>ChickenPOMC</b>      | REEGKRSYSMEHFRWGKPVGRKRRRPVKVYP - NGVDEESA E                                  |
| <b>S.tropicalisPOMC</b> | RQENKRSYSMEHFRWGKPVGRKRRRPVKVYP - NGVEEESA E                                  |
| <b>ZebrafishPOMCa</b>   | RHDHKRSYSMEHFRWGKPVGRKRRRPVKVYT - NGVEEESA E                                  |
| <b>MedakaPOMCa</b>      | SPQTKRSYSMEHFRWGKPVGRKRRRPVKVYTPNGVEEESA E                                    |
| <b>SticklebackPOMCa</b> | SPQAKRSYSMEHFRWGKPVGRKRRRPVKVYAPNGVEEESA E                                    |
| <b>ZebrafishPOMCb</b>   | HGDERRSYSMEHFRWGKPMGRKRRRPVKVLSNGALEEEPEE                                     |
| <b>MedakaPOMCb</b>      | SDMNRRSYAMEHFRWGKPIGRKRRRPVKVFASSLEEGDSSE                                     |
| <b>SticklebackPOMCb</b> | LSDARRSYSMEHFRWGKPTGRKRRRPVKVFASSLEGGGSSE                                     |

```

      . . . . | . . . . | . . . . | . . . . | . . . . | . . . . | . . . . | . . . . |
HumanPENK ER - - SHHQDGS DNEEEVSKRYGGFMRGLKRSPQL - - - - -
MousePENK AKD - SHQQESTNND E DMSKRYGGFMRS LKRSPQL - - - - -
DogPENK EG - G - PHQEGSD - DEDVSKRYGGFMRA LKRSPQL - - - - -
OpossumPENK EA - - GRYQAGNENE EEEVSKRYGGFMRSYKRSP EL - - - - -
ChickenPENK EA - - AHYRGVNEN DGDVSKRYGGFMRSV KRSP EL - - - - -
S.tropicalisPENK ESA - IYHDNNS ET PGEMNKRYGGFMRGYRR STD L - - - - -
ZebrafishPENKa EE - - AALTRSKGGE EGTAKRYGGFMR - RGGLYDL - - - - -
MedakaPENK GE - - - HSRERDGGQGGAVKRYGGFMRR AEGGEGTGS LL - - - - -
SticklebackPENK PE - - - QGGE - - GPGGDAVKRYGGFMRRAGGGVA QGDLL - - - - -
ZebrafishPENKb ES - - - - - DDQPDGDMVKRYGGFMRSVQEN - - - - - - - -
HumanPDYN L - - - - - - AEEDPKEQVKRYGGFLRKYPKRS SEVA - - - - -
MousePDYN F - - - - - - NEEDLRKQAKRYGGFLRKYPKRS SEMARD - - - - -
DogPDYN S - - - - - - NEEDPKEQVKRYGGFLRKYPKRS SEVA - - - - -
OpossumPDYN YPGE GAAAS SLETRKDEM KRYGGFLRKYPKRS FEVAG - - - - -
Zebra finchPDYN - - - - - - - - - - - - - - - - - - - - - - - - - - - - - - -
S.tropicalisPDYN WFS - - - - - - PTWGT KDERKRYGGFLRKYPKR ILSQEGD LE
ZebrafishPDYN YDN - - - - - - - EVPLNEVKRYGGFLRKFGP - - KR SYF - - - - -
MedakaPDYN HS - - - - - - - - - - - SVKRYGGFLRKFGPKSKR SSS - - - - -
SticklebackPDYN RG - - - - - - - - - - - YVKRYGGFLRKFGPKSKR SSS - - - - -
HumanPNOC - - - - - - - - - - - - - - - - - - - - - - - - - - - - -
MousePNOC - - - - - - - - - - - - - - - - - - - - - - - - - - - - -
DogPNOC - - - - - - - - - - - - - - - - - - - - - - - - - - - - -
OpossumPNOC - - - - - - - - - - - - - - - - - - - - - - - - - - - - -
ChickenPNOC - - - - - - - - - - - DEDISRRLGGGFPRGTRGS - - - - WPA - - -
S.tropicalisPNOC - - - - - EFGQLQNPANAVSKRFGGFVKGKYSYRKFMGP - - - - -
ZebrafishPNOCa GDS - EIEGDEQESA IHLIKRFGGF LKNKYGYRKFIDP - - - - -
MedakaPNOCa ED - - ANVAGREKGDAGFSKRFGGFVKGRHGYRR LMSP - - - - -
SticklebackPNOCa ATD - MAAGGQD GAGLSVFKRFGGFVKGRHGYRKLISP - - - - -
ZebrafishPNOCb - - - - - - DEKSDDA AVSVSKRFGGFMKGRHGLRKL VSS - - - - -
MedakaPNOCb QSE - MDEDNDSLQVVSLSKRFGGFQRGRHGYRKLIGSP - - - - -
SticklebackPNOCb QPE - GLRGQEASGAVTLSKRFGGFQRGRHGYRKLIGSS - - - - -
HumanPOMC - - - - - - - - - - - AFP - LEFKR - ELTGQRLREGDGP DGPADD
MousePOMC - - - - - - - - - - - AFP - LEFKR - ELEGER - - - - - PLG - - - - -
DogPOMC - - - - - - - - - - - AFP - VEFKK - ELARQRL EPALGPEGPAAG
OpossumPOMC - - - - - - - - - - - SYP - VEIRR - DLPMKINFPEYPELA IDEE
ChickenPOMC - - - - - - - - - - - SYP - MEFRR - EMAPDGD PFGLS EEE - - - - -
S.tropicalisPOMC - - - - - - - - - - - NYP - MELRR - ELSLELDY PDI DLDE - - - - -
ZebrafishPOMCa - - - - - - - - - - - TLP - AEMRR - ELANNEVDY P QEE - - - - -
MedakaPOMCa - - - - - - - - - - - VFP - GEMRRRELANELLAAA AEEEEERAME
SticklebackPOMCa - - - - - - - - - - - LYPPGEMRRRELM EDEKKAQQHQREEGEE
ZebrafishPOMCb - - - - - - - - - - - SEESVRVERGQSGTLEVQH RNN - - - - -
MedakaPOMCb R - - - - - - - - - - - SFPFRVRRHLSSDKNEAKGMHHEASHRNL
SticklebackPOMCb R - - - - - - - - - - - GFPALARRQLGLNKYKARDLK - EGSRGQA

```

```

. . . . | . . . . | . . . . | . . . . | . . . . | . . . . | . . . . | . . . . |
HumanPENK - - - - - - - - - - - - - - - - - - - - - - - - - - - EDEAKE LQ
MousePENK - - - - - - - - - - - - - - - - - - - - - - - - - - - EDEAKE LQ
DogPENK - - - - - - - - - - - - - - - - - - - - - - - - - - - EEEAKE LQ
OpossumPENK - - - - - - - - - - - - - - - - - - - - - - - - - - - EDEAKE LQ
ChickenPENK - - - - - - - - - - - - - - - - - - - - - - - - - - - EDEAKE LQ
S.tropicalisPENK - - - - - - - - - - - - - - - - - - - - - - - - - - - EDETRGIQ
ZebrafishPENKa - - - - - - - - - - - - - - - - - - - - - - - - - - - ESGVRELQ
MedakaPENK - - - - - - - - - - - - - - - - - - - - - - - - - - - EAVLDRGLK
SticklebackPENK - - - - - - - - - - - - - - - - - - - - - - - - - - - EAVLGRGLK
ZebrafishPENKb - - - - - - - - - - - - - - - - - - - - - - - - - - - TGRDLH
HumanPDYN - - - - - - - - - - - - - - - - - - - - - - - - - - - GEG - - DGDSMGHEDLY
MousePDYN - - - - - - - - - - - - - - - - - - - - - - - - - - - EDGGQDGDQVGHEDLY
DogPDYN - - - - - - - - - - - - - - - - - - - - - - - - - - - GEGNGDGDVAVGHEDLY
OpossumPDYN - - - - - - - - - - - - - - - - - - - - - - - - - - - AGDVQE QEDLH
Zebra finchPDYN - - - - - - - - - - - - - - - - - - - - - - - - - - - LH
S.tropicalisPDYN RRRRLQEGLEAGQAIVTGQEI - - - ETGQELDLERGTAELE
ZebrafishPDYN - - - - - - - - - - - - - - - - - - - - - - - - - - - VDDTNPQVLQ
MedakaPDYN - - - - - - - - - - - - - - - - - - - - - - - - - - - AEQESQEPEELQ
SticklebackPDYN - - - - - - - - - - - - - - - - - - - - - - - - - - - AETDSQEPEELQ
HumanPNOC - - - - - - - - - - - - - - - - - - - - - - - - - - -
MousePNOC - - - - - - - - - - - - - - - - - - - - - - - - - - -
DogPNOC - - - - - - - - - - - - - - - - - - - - - - - - - - -
OpossumPNOC - - - - - - - - - - - - - - - - - - - - - - - - - - -
ChickenPNOC - - - - - - - - - - - - - - - - - - - - - - - - - - - ARGVQ
S.tropicalisPNOC - - - - - - - - - - - - - - - - - - - - - - - - - - - SKDLQ
ZebrafishPNOCa - - - - - - - - - - - - - - - - - - - - - - - - - - - GRSLQ
MedakaPNOCa - - - - - - - - - - - - - - - - - - - - - - - - - - - GRSYQ
SticklebackPNOCa - - - - - - - - - - - - - - - - - - - - - - - - - - - GRLYQ
ZebrafishPNOCb - - - - - - - - - - - - - - - - - - - - - - - - - - - GRPLQ
MedakaPNOCb - - - - - - - - - - - - - - - - - - - - - - - - - - - MRPLQ
SticklebackPNOCb - - - - - - - - - - - - - - - - - - - - - - - - - - - MRPLQ
HumanPOMC GAGA QADLEHSLLVAA - - - EKKDEGPYRMEHFRWGSPPKD
MousePOMC - - LEQVLES DA - - - - EKDDGDPYRVEHFRWSNPPKDKRYGG
DogPOMC - VAALADLEYGLVAEAGAAEKKDDGPKMEHFRWGSPPKD
OpossumPOMC - - - - - - EAAKEVYEEK - - - VKKDGGGYKMEHFRWGTPPKD
ChickenPOMC - - - - - - EEEEEEEGEE - - - EKKDGGSYRMRHFRWHAPLKD
S.tropicalisPOMC - - - - - - DI EDNEVESA - - - LTKKNGNYRMHFRWGSPPKD
ZebrafishPOMCa - - - - - - - MPLNPL - - - - GKKDPPYKMT HFRWSVPPAS
MedakaPOMCa EEEEEERQHLLAGLQ - - - - EKKDGSYKMKHFRWSGPPAS
SticklebackPOMCa EGEEE - - - - - LPGDHH - - - - EKKD GAYKMKHFRWSGPPAS
ZebrafishPOMCb - - - - - - - - - - - - - - - - - - - - - - - - - - - VKNNGKYRMTHFRWNAPP - D
MedakaPOMCb GLLVSKFPPRKDVPLQ - - - - DRKEETYRMNHFRWGSPTS
SticklebackPOMCb PQRVG - HKAQAPVSLP - - - - ARKDGAYRMSHFRWGSPPPS

```

|                  | 290                   | 300                           | 310              | 320 |
|------------------|-----------------------|-------------------------------|------------------|-----|
| HumanPENK        | KRYGGFMRRVGRP         | - - EWWMDYQKRYGGFLKRFAEA      | - LPSD           |     |
| MousePENK        | KRYGGFMRRVGRP         | - - EWWMDYQKRYGGFLKRFAES      | - LPSD           |     |
| DogPENK          | KRYGGFMRRVGRP         | - - EWWMDYQKRYGGFLKRFAES      | - LPSD           |     |
| OpossumPENK      | KRYGGFMRRVGRP         | - - EWWLDYQKRYGGFLKRFAES      | - LPSD           |     |
| ChickenPENK      | KRYGGFMRRVGRP         | - - EWWLDYQKRYGGFLKRFAES      | ILPSE            |     |
| S.tropicalisPENK | KRYGGFMRRVGRP         | - - EWWQDYQKRYGGFMRRFTDS      | FLPSE            |     |
| ZebrafishPENKa   | KRYGGFMRRVGRP         | - - DWWQE - SKRYGGFLKRSQE     | - - - -          |     |
| MedakaPENK       | KRYGGFMRRVGRP         | - - EWLVD - GSKNGGVFKRAWEN    | - - - -          |     |
| SticklebackPENK  | KRYGGFMRRVGRP         | - - EWLVD - SSKSGGMLKRAWES    | - - - -          |     |
| ZebrafishPENKb   | KRYGGFMRRVGRP         | - - DWLDN - - QKSGGLLKRTWEE   | - - - -          |     |
| HumanPDYN        | KRYGGFLRRIRPK         | - - - LKWDNQKRYGGFLRRQFKVVTRS | Q                |     |
| MousePDYN        | KRYGGFLRRIRPK         | - - - LKWDNQKRYGGFLRRQFKVVTRS | Q                |     |
| DogPDYN          | KRYGGFLRRIRPK         | - - - LKWDNQKRYGGFLRRQFKVVTRS | Q                |     |
| OpossumPDYN      | KRYGGFMRRIRPK         | - - - LKWDNQKRYGGFLRRQFKVVTR  | SE               |     |
| Zebra finchPDYN  | KRYGGFLRRIRPK         | - - - LKWDNQKRYGGFLRRQFKVTTR  | SD               |     |
| S.tropicalisPDYN | KRYGGFLRRIRPK         | - - - LRWDNQKRYGGFLRRQFKVNAR  | SE               |     |
| ZebrafishPDYN    | KRYGGFMRRIRPK         | - - - LRWDNQKRYGGFLRRHFKISVRS | D                |     |
| MedakaPDYN       | KRYGGFMRRVRPKLNNLKWD  | - - KRYGGFLRRHFKISVRS         | L                |     |
| SticklebackPDYN  | KRYGGFMRRIRPKSNNLKWD  | - - KRYGGFLRRHFKISVRS         | A                |     |
| HumanPNOC        | KRFGGFTGARKSA         | - - - RKLANQKRFSEFMRQYLVL     | SMQSS            |     |
| MousePNOC        | KRFGGFTGARKSA         | - - - RKLANQKRFSEFMRQYLVL     | SMQSS            |     |
| DogPNOC          | KRFGGFTGARKSA         | - - - RKLANQKRFSEFMRQYLVL     | SMQSS            |     |
| OpossumPNOC      | KRFGGFTGARKSA         | - - - RKLANQKRFSEFMRQYLV      | MSMHAS           |     |
| ChickenPNOC      | KRYGGFIGVRKSA         | - - - RKWNNQKRFSEFLKQYLG      | M - - - SP       |     |
| S.tropicalisPNOC | KRYGGFIGVRKSA         | - - - RKWNNQKRFSEFLRQYLCMSTR  | SA               |     |
| ZebrafishPNOCa   | KRYGGFIGVRKSA         | - - - RKWNNQKRFSEFLKQYLG      | M - - - SS       |     |
| MedakaPNOCa      | KRYGGFIGIRKSA         | - - - RKWNNQKRFSEFLKQYLG      | M - - - ST       |     |
| SticklebackPNOCa | KRYGGFVGIRKSA         | - - - RKWNNQKRFSDLLKQYLGR     | - - - SA         |     |
| ZebrafishPNOCb   | KRYGGFIGIRKSA         | - - - RKWNNQKRVSQLLRQYLSLTGR  | SG               |     |
| MedakaPNOCb      | KRYGGFIGVRKSA         | - - - RKWNSQKRVNQLLRQYLG      | M - - - RSS      |     |
| SticklebackPNOCb | KRYGGFIGVRKSA         | - - - RKWNSQKRVNQLLRQYLG      | L - - - RSS      |     |
| HumanPOMC        | KRYGGFMTS             | - - EKSQTPLVTLFKNAIKNA        | YKKGE - - - -    |     |
| MousePOMC        | FMTS                  | - - EKSQTPLVTLFKNAIKNA        | HKKGQ - - - - -  |     |
| DogPOMC          | KRYGGFMSS             | - - ERSQTPLVTLFKNAIKNA        | HKKGQ - - - - -  |     |
| OpossumPOMC      | KRYGGFMIS             | - - EKSHTPLMTLFKNAIKNGH       | KKGQ - - - - -   |     |
| ChickenPOMC      | KRYGGFMSL             | - - EHSQTPLMTLFKNAIVKS        | AYKKGQ - - - - - |     |
| S.tropicalisPOMC | KRYGGFMTP             | - - ERSQTPLMTLFKNAIKNTH       | KKGQ - - - - -   |     |
| ZebrafishPOMCa   | KRYGGFMKSWDERAQKPLLT  | TLFKNAVMMHKDQPRKDE            | - - - - -        |     |
| MedakaPOMCa      | KRYGGFMKSWEDRQKPLVTL  | FKNAINKDEQQ                   | - - - - -        |     |
| SticklebackPOMCa | KRYGGFMRSWDERDPRPLLT  | LLKKNVLNTEGRQ                 | - - - - -        |     |
| ZebrafishPOMCb   | KRYGGLMRPYLDESHKPLITL | IRNAIGNGQQFTD                 | - - - - -        |     |
| MedakaPOMCb      | KRNGSFRKLWEESSEENPAT  | LLKNAIFMKDVQR                 | - KID - - -      |     |
| SticklebackPOMCb | KRNGSTMRQPRKKPKGQLDKL | LRN - IFLKDVQRSRMG            | - - -            |     |



|                  | . . . .   . . . .   . . . .   . . . .   . . . .   . . . . |
|------------------|-----------------------------------------------------------|
| HumanPENK        | EEGESYSKEVPEMEKRYGGFMRF - -                               |
| MousePENK        | EEGENYSKEVPEIEKRYGGFMRF - -                               |
| DogPENK          | EEGESYSKEVPEMEKRYGGFMRF A - - A -                         |
| OpossumPENK      | EEGESYSKEVPEMEKRYGGFMRF - -                               |
| ChickenPENK      | EDGETYSKEVPEMEKRYGGFMRF - -                               |
| S.tropicalisPENK | EDGESYSKENPDM EKRYGGFMRF - -                              |
| ZebrafishPENKa   | DEDENSS - - - EVEKRYGGFMGY - -                            |
| MedakaPENK       | - - - - - GSGLQKRYGGFMD - - -                             |
| SticklebackPENK  | - - - - - GSELQKRYGGFMD - - -                             |
| ZebrafishPENKb   | - GGETAL - - - PDMQKRYGGFMD - - -                         |
| HumanPDYN        | EDPNAYS GELFDA - - A - - - - -                            |
| MousePDYN        | ENPNTYS - EDLDV - - A - - - - -                           |
| DogPDYN          | EDPNAYS GELLDG - - A - - - - -                            |
| OpossumPDYN      | EDPNAYS GEVAGL - - A - - - - -                            |
| Zebra finchPDYN  | EDPSAYS GEVSDL - - A - - - - -                            |
| S.tropicalisPDYN | EDPTMFS GELSYL - - A - - - - -                            |
| ZebrafishPDYN    | EEPS - - SYEDYAL - - A - - - - -                          |
| MedakaPDYN       | EEPVYSYDEPSLQTN A - - - - -                               |
| SticklebackPDYN  | EOPYYSYDDL SL - - A - - - - -                             |
| HumanPNOC        | QRR - - - - - RTLHQNGNV - - - - -                         |
| MousePNOC        | QRR - - - - - RTLHQNGNV - - - - -                         |
| DogPNOC          | QRR - - - - - RTLHQNGNV - - - - -                         |
| OpossumPNOC      | EHQRHGLAPGRNLRQNSNV - - - - -                             |
| ChickenPNOC      | RSSEYD - - MAGDLSEHNEI - - - - -                          |
| S.tropicalisPNOC | EYDSFTN - DVSDINGQNEI - - - - -                           |
| ZebrafishPNOCa   | RASEYN - SMSADLTQQNE - - - - -                            |
| MedakaPNOCa      | RATEFN - SLSEDLTEQNEV - - - - -                           |
| SticklebackPNOCa | KATELN - SVSKDL DQQNEV - - - - -                          |
| ZebrafishPNOCb   | RSGHIN - SLSTRIRRQSEV - - - - -                           |
| MedakaPNOCb      | RSGRFN - ASMNR AWRQNKL - - - - -                          |
| SticklebackPNOCb | RSGRVGYAPVTRVWRQNQL - - - - -                             |
| HumanPOMC        | - - -                                                     |
| MousePOMC        | - - -                                                     |
| DogPOMC          | - - -                                                     |
| OpossumPOMC      | - - -                                                     |
| ChickenPOMC      | - - -                                                     |
| S.tropicalisPOMC | - - -                                                     |
| ZebrafishPOMCa   | - - -                                                     |
| MedakaPOMCa      | - - -                                                     |
| SticklebackPOMCa | - - -                                                     |
| ZebrafishPOMCb   | - - -                                                     |
| MedakaPOMCb      | - - -                                                     |
| SticklebackPOMCb | - - -                                                     |
