# Supplementary material for: Concomitant Duplications of Opioid Peptide and Receptor Genes before the Origin of Jawed Vertebrates
Source: PLoS One. 2010 May 6;5(5):e10512. doi: 10.1371/journal.pone.0010512 (PMC2865548; doi:10.1371/journal.pone.0010512)
Supplement: Table S1 — List of accession numbers for all the sequences used in the phylogenetic analyzis. (1.53 MB XLS) [file pone.0010512.s001.xls]

## Sheet: Blad1
Protein family	Species	Chromosome Name	Gene Start (bp)	Gene ID, Ensembl Gene ID or NCBI accession number	HGNC Name	Assigned sequence name	Comments
BMP (BONE MORPHOGENETIC)
	Human	6	7672009	ENSG00000153162	BMP6	Hsa.6.BMP6
	Human	20	55177211	ENSG00000101144	BMP7	Hsa.20.BMP7
	Human	6	55726402	ENSG00000112175	BMP5	Hsa.6.BMP5
	Human	1	39729905	ENSG00000183682	BMP8A	Hsa.1.BM8A
	Human	1	39995441	ENSG00000116985	BMP8B	Hsa.1.BM8B
	Dog	35	10691696	XP_535880.2		Cfa.35.XP_535880.2
	Dog	15	6136687	ENSCAFG00000003087		Cfa.15
	Dog	24	45185906	ENSCAFG00000012011		Cfa.24
	Dog	12	26091786	ENSCAFG00000002345		Cfa.12
	Opossum	3	336449276	ENSMODG00000010012		Mdo.3
	Opossum	2	305639555	ENSMODG00000018782		Mdo.2
	Opossum	1	486734166	ENSMODG00000016448		Mdo.1
	Opossum	4	423445992	ENSMODG00000017664		Mdo.4
	Chicken	23	5721628	ENSGALG00000024064		Gga.23
	Chicken	20	11640320	ENSGALG00000007668		Gga.20
	Chicken	2	65542331	XP_418956.2		Gga.2.XP_418956.2
	Chicken	3	90160798	ENSGALG00000016293		Gga.3
	Zebrafish	24	6549544	ENSDARG00000015686		Dre.24
	Zebrafish	23	1718294	ENSDARG00000063230		Dre.23
	Zebrafish	19	32535433	ENSDARG00000035677		Dre.19
	Zebrafish	11	42854088	ENSDARG00000018260		Dre.11
	Zebrafish	13	99955	NP_957345.1		Dre.13.NP_957345.1
	Medaka	20	10465384	ENSORLG00000006529		Ola.20
	Medaka	11	16256583	ENSORLG00000007124		Ola.11
	Medaka	15	23634106	ENSORLG00000009907		Ola.15
	Medaka	7	18113562	ENSORLG00000011720		Ola.7
	Medaka	5	26051120	ENSORLG00000013494		Ola.5
	Stickleback	groupX	1255409	ENSGacG00000001991		Gac.X
	Stickleback	groupXXI	3831486	ENSGacG00000002307		Gac.XXI
	Stickleback	groupVI	7726619	ENSGacG00000006266		Gac.VI
	Stickleback	groupXVII	9984936	ENSGacG00000009945		Gac.XVII
	Stickleback	scaffold_68	482712	ENSGacG00000015125		Gac.sc68
	Sea squirt	2q	5567135	ENSCING00000003777		Cin.2q
	Fruitfly	2L	19695553	CG31695		Dme.2L
	Fruitfly	2R	19359183	CG5562		Dme.2R
	Florida lancelet	scaffold_181	1135783	estExt_fgenesh2_pg.C_1810041		Bfl.sc181
DLGAP (DISKS LARGE ASSOCIATED SHORT)
	Human	18	3488837	ENSG00000170579	DLGAP1	Hsa.18.DLGAP1
	Human	8	1436941	ENSG00000198010	DLGAP2	Hsa.8.DLGAP2
	Human	20	34357672	ENSG00000080845	DLGAP4	Hsa.20.DLGAP4
	Human	1	35103624	ENSG00000116544	DLGAP3	Hsa.1.DLGAP3
	Dog	15	10085789	ENSCAFG00000003602		Cfa.15
	Dog	24	28196231	ENSCAFG00000008491		Cfa.24
	Dog	37	33690189	ENSCAFG00000016291		Cfa.37
	Dog	7	73122518	ENSCAFG00000018531		Cfa.7
	Opossum	3	269131863	ENSMODG00000021461		Mdo.3
	Opossum	1	389840734	ENSMODG00000001423		Mdo.1.a
	Opossum	4	417697913	ENSMODG00000017948		Mdo.4
	Opossum	1	548721148	ENSMODG00000014224		Mdo.1.b
	Chicken	23	4752162	ENSGALG00000002526		Gga.23
	Chicken	20	365641	ENSGALG00000001046		Gga.20
	Chicken	3	93867951	ENSGALG00000016352		Gga.3
	Chicken	2	103738771	ENSGALG00000014793		Gga.2
	Zebrafish	24	10461207	ENSDARG00000037415		Dre.24
	Zebrafish	17	1332335	ENSDARG00000059340		Dre.17
	Zebrafish	20	15112451	ENSDARG00000011903		Dre.20
	Zebrafish	6	39708789	ENSDARG00000012823		Dre.6
	Zebrafish	19	34422876	ENSDARG00000055459		Dre.19
	Zebrafish	23	39794161	ENSDARG00000070146		Dre.23.a
	Zebrafish	23	42864410	ENSDARG00000060849		Dre.23.b
	Zebrafish	2	24043770	ENSDARG00000014280		Dre.2
	Medaka	11	13284272	ENSORLG00000005540		Ola.11
	Medaka	17	13801824	ENSORLG00000008302		Ola.17
	Medaka	20	17445288	ENSORLG00000010388		Ola.20
	Medaka	24	4457313	ENSORLG00000011302		Ola.24
	Medaka	7	19864203	ENSORLG00000012896		Ola.7
	Medaka	5	30753930	ENSORLG00000016608		Ola.5
	Medaka	22	15216398	ENSORLG00000017270		Ola.22
	Stickleback	groupXII	1555543	ENSGacG00000003221		Gac.XII
	Stickleback	groupXXI	8805170	ENSGacG00000003847		Gac.XXI
	Stickleback	groupXV	3284481	ENSGacG00000006772		Gac.XV
	Stickleback	groupX	11228435	ENSGacG00000007439		Gac.X
	Stickleback	groupXVIII	7367731	ENSGacG00000008099		Gac.XVIII
	Stickleback	groupXVII	7373195	ENSGacG00000008148		Gac.XVII
	Stickleback	groupIII	5781085	ENSGacG00000014766		Gac.III
	Nematode	III	5431365	W03A5.4		Cel.III
EPB41
	Human	18	5382388	ENSG00000082397	EPB41L3	Hsa.18.EPB41L3
	Human	2	120487139	ENSG00000115109	EPB41L5	Hsa.2.EPB41L5
	Human	20	34142840	ENSG00000088367	EPB41L1	Hsa.20.EPB41L1
	Human	1	29086215	ENSG00000159023	EPB41	Hsa.1.EPB41
	Human	6	131202180	ENSG00000079819	EPB41L2	Hsa.6.EPB41L2
	Dog	24	27964618	ENSCAFG00000008413		Cfa.24
	Dog	7	74818202	ENSCAFG00000018575		Cfa.7
	Dog	2	74366311	ENSCAFG00000011677		Cfa.2
	Dog	1	72177842	ENSCAFG00000001136		Cfa.1
	Opossum	3	271426815	ENSMODG00000021459		Mdo.3
	Opossum	4	368231198	ENSMODG00000011038		Mdo.4
	Opossum	1	389540333	ENSMODG00000001490		Mdo.1
	Opossum	2	404501008	ENSMODG00000017602		Mdo.2
	Chicken	23	2926246	ENSGALG00000001329		Gga.23
	Chicken	20	180712	ENSGALG00000001026		Gga.20
	Chicken	3	59614866	ENSGALG00000014004		Gga.3
	Chicken	2	103133015	ENSGALG00000014770		Gga.2.b
	Zebrafish	24	39268898	NP_001003987.1		Dre.24.NP_001003987.1
	Zebrafish	19	20801385	ENSDARG00000070585		Dre.19
	Zebrafish	7	21155131	NP_999977.1		Dre.7.NP_999977.1
	Medaka	17	4886442	ENSORLG00000004190		Ola.17
	Medaka	7	9181258	ENSORLG00000004932		Ola.7
	Medaka	16	12468254	ENSORLG00000006853		Ola.16
	Medaka	11	21135248	ENSORLG00000010840		Ola.11
	Medaka	5	22376805	ENSORLG00000011409		Ola.5
	Medaka	24	16140665	ENSORLG00000017159		Ola.24
	Stickleback	scaffold_111	49534	ENSGacG00000001433		Gac.sc111
	Stickleback	groupXII	8898809	ENSGacG00000006968		Gac.XII
	Stickleback	groupXX	9233627	ENSGacG00000007879		Gac.XX
	Stickleback	groupXVII	13225419	ENSGacG00000011718		Gac.XVII
	Stickleback	groupXVIII	15163258	ENSGacG00000013124		Gac.XVIII
	Stickleback	groupIII	11266272	ENSGacG00000016674		Gac.III
	Sea squirt	1q	3678516	ENSCING00000001753		Cin.1q
	Fruitfly	2R	14743928	CG11949		Dme.2R
	Florida lancelet	scaffold_71	2561736	estExt_fgenesh2_pg.C_710159		Bfl.sc71
EYA (EYES ABSENT HOMOLOG)
	Human	8	72272222	ENSG00000104313	EYA1	Hsa.8.EYA1
	Human	20	44956670	ENSG00000064655	EYA2	Hsa.20.EYA2
	Human	6	133604206	ENSG00000112319	EYA4	Hsa.6.EYA4
	Human	1	28169442	ENSG00000158161	EYA3	Hsa.1.EYA3
	Dog	29	23178622	ENSCAFG00000007894		Cfa.29
	Dog	24	37101021	ENSCAFG00000010677		Cfa.24
	Dog	2	75239264	ENSCAFG00000011935		Cfa.2
	Dog	1	29482792	ENSCAFG00000000196		Cfa.1
	Opossum	3	165520488	ENSMODG00000007286		Mdo.3
	Opossum	4	367144984	ENSMODG00000010782		Mdo.4
	Opossum	2	407843003	ENSMODG00000017518		Mdo.2
	Opossum	1	499168981	ENSMODG00000016233		Mdo.1
	Chicken	23	1435364	ENSGALG00000000777		Gga.23
	Chicken	20	5621884	ENSGALG00000004508		Gga.20
	Chicken	3	58318371	ENSGALG00000013987		Gga.3
	Chicken	2	121596587	ENSGALG00000015622		Gga.2
	Zebrafish	24	17261010	ENSDARG00000014259		Dre.24
	Zebrafish	19	15620495	ENSDARG00000036100		Dre.19
	Zebrafish	23	30207946	ENSDARG00000012397		Dre.23
	Zebrafish	14	61418869	NP_001004558.1		Dre.14.NP_001004558.1
	Medaka	5	11584421	ENSORLG00000006206		Ola.5
	Medaka	20	14628594	ENSORLG00000008056		Ola.20
	Medaka	11	19186115	ENSORLG00000009396		Ola.11
	Medaka	24	13996400	ENSORLG00000016484		Ola.24
	Stickleback	groupX	2013153	ENSGacG00000002372		Gac.X
	Stickleback	groupXXI	6826891	ENSGacG00000002803		Gac.XXI
	Stickleback	groupXVII	4162499	ENSGacG00000005912		Gac.XVII
	Stickleback	groupXVIII	10954413	ENSGacG00000010932		Gac.XVIII
	Sea squirt	scaffold_65	425499	ENSCING00000008588		Cin.sc65
	Fruitfly	2L	6527449	CG9554		Dme.2L
	Florida lancelet	scaffold_123	1242104	fgenesh2_pg.scaffold_123000072		Bfl.sc123
GATA (TRANSCRIPTION FACTOR GATA)
	Human	18	18003414	ENSG00000141448	GATA6	Hsa.18.GATA6
	Human	8	11599122	ENSG00000136574	GATA4	Hsa.8.GATA4
	Human	20	60471948	ENSG00000130700	GATA5	Hsa.20.GATA5
	Dog	25	29113069	XP_543205.2		Cfa.25.XP_543205.2
	Dog	24	49464998	XP_543086.2		Cfa.24.XP_543086.2
	Dog	7	68974377	XP_547642.2		Cfa.7.XP_547642.2
	Opossum	3	262897029	ENSMODG00000021492		Mdo.3
	Opossum	1	477085188	ENSMODG00000016774		Mdo.1.a
	Opossum	1	559898131	ENSMODG00000011997		Mdo.1.b
	Chicken	20	8001747	ENSGALG00000005352		Gga.20
	Chicken	2	105796451	NP_990751.1		Gga.2.NP_990751.1
	Chicken	3	110129452	ENSGALG00000016662		Gga.3
	Zebrafish	23	5359584	ENSDARG00000017821		Dre.23
	Zebrafish	20	54174547	ENSDARG00000035759		Dre.20
	Zebrafish	2	50921453	ENSDARG00000035831		Dre.2
	Medaka	7	5121213	ENSORLG00000002378		Ola.7
	Medaka	24	17079864	ENSORLG00000017374		Ola.24
	Medaka	17	29466946	ENSORLG00000017667		Ola.17
	Stickleback	groupXII	2555194	ENSGacG00000003649		Gac.XII
	Stickleback	groupXVIII	10178187	ENSGacG00000010274		Gac.XVIII
	Stickleback	groupIII	13558657	ENSGacG00000017300		Gac.III
	Fruitfly	3R	11851819	CG3978		Dme.3R
	Florida lancelet	scaffold_160	83593	fgenesh2_pg.scaffold_160000009		Bfl.sc160
KCNQ (POTASSIUM VOLTAGE GATED CHANNEL SUBFAMILY KQT MEMBER 1)
	Human	8	133210691	ENSG00000184156	KCNQ3	Hsa.8.KCNQ3
	Human	20	61502007	ENSG00000075043	KCNQ2	Hsa.20.KCNQ2
	Human	6	73388530	ENSG00000185760	KCNQ5	Hsa.6.KCNQ5
	Human	1	41022271	ENSG00000117013	KCNQ4	Hsa.1.KCNQ4
	Dog	13	31810606	ENSCAFG00000001105		Cfa.13.a
	Dog	15	5210125	ENSCAFG00000002814		Cfa.15
	Dog	24	50107441	ENSCAFG00000012931		Cfa.24
	Dog	12	37872175	XP_532200.2		Cfa.12.XP_532200.2
	Opossum	3	410490931	ENSMODG00000001213		Mdo.3
	Opossum	2	325006545	ENSMODG00000018548		Mdo2
	Opossum	1	473875675	ENSMODG00000016863		Mdo.1
	Opossum	4	424761592	ENSMODG00000017582		Mdo.4
	Chicken	23	5257203	ABC75089.1		Gga.23.ABC75089.1
	Chicken	20	8924202	ENSGALG00000005822		Gga.20
	Chicken	3	84308195	ENSGALG00000015932		Gga.3
	Chicken	2	147084231	ENSGALG00000016246		Gga.2
	Zebrafish	1	26200611	XP_697081.3		Dre.1.XP_697081.3
	Zebrafish	Zv7_NA1245	9498	ENSDARG00000029916		Dre.NA1245
	Zebrafish	2	38494586	XP_697349.2		Dre.2.XP_697349.2
	Zebrafish	13	21454739	XP_684855.2		Dre.13.XP_684855.2
	Zebrafish	8	23809158	XP_699965.2		Dre.8.XP_699965.2
	Medaka	7	1156879	ENSORLG00000000854		Ola.7
	Medaka	15	10128622	ENSORLG00000002279		Ola.15
	Medaka	1	10017606	ENSORLG00000002481		Ola.1
	Medaka	17	10097082	ENSORLG00000006562		Ola.17
	Medaka	4	12623739	ENSORLG00000007158		Ola.4*	manual edited
	Medaka	11	21893278	ENSORLG00000012041		Ola.11
	Stickleback	groupXVII	466078	ENSGacG00000003203		Gac.XVII
	Stickleback	groupXII	4212224	ENSGacG00000004646		Gac.XII
	Stickleback	groupX	7398926	ENSGacG00000004872		Gac.X
	Stickleback	groupVI	16442104	ENSGacG00000012068		Gac.VI
	Stickleback	scaffold_135	171327	ENSGacG00000015812		Gac.sc135
	Stickleback	groupIX	9900166	ENSGacG00000018097		Gac.IX
	Sea squirt	2q	6805394	ENSCING00000011369		Cin.2q
	Fruitfly	2R	5657706	CG33135		Dme.2R
	Florida lancelet	scaffold_181	1179676	fgenesh2_pg.scaffold_181000044		Bfl.sc181
L3MBTL (LETHAL 3 MALIGNANT BRAIN TUMOR 4 PROTEIN)
	Human	18	5944713	ENSG00000154655	L3MBTL4	Hsa.18.LTMBTL4
	Human	20	41575558	ENSG00000185513	L3MBTL	Hsa.20.L3MBTL
	Human	6	130381427	ENSG00000198945	L3MBTL3	Hsa.6.L3MBTL3
	Dog	24	34211452	ENSCAFG00000009291		Cfa.24
	Dog	1	71616976	ENSCAFG00000001115		Cfa.1
	Dog	7	75348592	ENSCAFG00000018588		Cfa.7
	Opossum	3	272286698	ENSMODG00000021457		Mdo.3
	Opossum	1	385894559	ENSMODG00000003647		Mdo.1
	Opossum	2	403367698	ENSMODG00000017623		Mdo.2
	Chicken	23	2999593	XP_417746.2		Gga.23.XP_417746.2
	Chicken	20	29872	ENSGALG00000000983		Gga.20
	Chicken	3	60009318	ENSGALG00000014009		Gga.3
	Zebrafish	23	3882512	XP_699604.3		Dre.23.XP_699604.3
	Zebrafish	20	2147534	XP_684161.3		Dre.20.XP_684161.3
	Zebrafish	16	19435141	XP_688020.2		Dre.16.XP_688020.2
	Medaka	7	7380569	ENSORLG00000003513		Ola.7
	Medaka	16	14750967	ENSORLG00000009102		Ola.16
	Medaka	ultracontig237	3927	ENSORLG00000019825		Ola.uc237
	Stickleback	scaffold_146	8674	ENSGacG00000001138		Gac.sc146
	Stickleback	groupXII	7535351	ENSGacG00000006074		Gac.XII
	Stickleback	groupXX	10781656	ENSGacG00000009206		Gac.XX
	Sea squirt	7q	621272	ENSCING00000004084		Cin.7q
	Fruitfly	3R	23091952	CG5954		Dme.3R
	Florida lancelet	scaffold_123	497566	estExt_fgenesh2_pg.C_1230031		Bfl.sc123
LAMA (LAMININ SUBUNIT ALPHA FLAGS: PRECURSOR)
	Human	18	19523560	ENSG00000053747	LAMA3	Hsa.18.LAMA3
	Human	20	60317510	ENSG00000130702	LAMA5	Hsa.20.LAMA5
	Human	6	112536654	ENSG00000112769	LAMA4	Hsa.6.LAMA4
	Dog	24	49361673	XP_855195.1		Cfa.24.XP_855195.1
	Dog	7	67443045	ENSCAFG00000018173		Cfa.7
	Dog	12	71573457	ENSCAFG00000004043		Cfa.12
	Opossum	3	260612750	ENSMODG00000021502		Mdo.3
	Opossum	2	378399119	ENSMODG00000017881		Mdo.2
	Opossum	1	477575022	ENSMODG00000016753		Mdo.1
	Chicken	20	7812354	ENSGALG00000005321		Gga.20
	Chicken	3	68340444	ENSGALG00000015001		Gga.3
	Chicken	2	106275582	ENSGALG00000015056		Gga.2
	Zebrafish	23	7213084	ENSDARG00000058543		Dre.23
	Zebrafish	20	185323	ENSDARG00000020785		Dre.20
	Medaka	17	26204786	ENSORLG00000016886		Ola.17
	Medaka	24	22633189	ENSORLG00000017997		Ola.24
	Medaka	ultracontig90	1377780	ENSORLG00000019677		Ola.uc90
	Stickleback	groupXVIII	4441380	ENSGacG00000006339		Gac.XVIII
	Stickleback	groupXII	13049591	ENSGacG00000010405		Gac.XII
	Stickleback	groupIII	1111559	ENSGacG00000013300		Gac.III
	Sea squirt	2q	3001175	ENSCING00000005180		Cin.2q
	Fruitfly	2L	14263522	CG15288		Dme.2L
	Fruitfly	3L	6177778	CG10236		Dme.3L.a
	Fruitfly	3L	9588866	CG3322		Dme.3L.b
	Florida lancelet	scaffold_122	1064984-1133736	fgenesh2_pg.scaffold_122000058		Bfl.sc122
LPIN
	Human	18	2906994	ENSG00000101577	LPIN2	Hsa.18.LPIN2
	Human	2	11804191	ENSG00000134324	LPIN1	Hsa.2.LPIN1
	Human	20	39402907	ENSG00000132793	LPIN3	Hsa.20.LPIN3
	Dog	24	32319530	ENSCAFG00000009142		Cfa.24
	Dog	17	11398712	ENSCAFG00000003621		Cfa.17
	Dog	7	72625408	ENSCAFG00000018442		Cfa.7
	Opossum	3	268368184	ENSMODG00000021466		Mdo.3
	Opossum	1	393368557	ENSMODG00000000676		Mdo.1.a
	Opossum	1	741558273	ENSMODG00000010415		Mdo.1.b
	Chicken	20	4922365	ENSGALG00000003780		Gga.20
	Chicken	3	100322613	ENSGALG00000016456		Gga.3
	Chicken	2	104103018	ENSGALG00000014836		Gga.2
	Zebrafish	6	4341958	ENSDARG00000015563		Dre.6
	Zebrafish	17	31285576	ENSDARG00000020239		Dre.17
	Zebrafish	2	25402688	ENSDARG00000061214		Dre.2
	Medaka	20	18846303	ENSORLG00000011317		Ola.20
	Medaka	3	24553544	ENSORLG00000011681		Ola.3
	Medaka	5	30842204	ENSORLG00000016643		Ola.5
	Medaka	24	14732082	ENSORLG00000016787		Ola.24
	Medaka	17	30701745	ENSORLG00000017866		Ola.17
	Stickleback	groupXXI	9588132	ENSGacG00000004201		Gac.XXI
	Stickleback	groupXVII	7414752	ENSGacG00000008176		Gac.XVII
	Stickleback	groupXVIII	15739307	ENSGacG00000013437		Gac.XVIII
	Stickleback	groupII	14517337	ENSGacG00000016288		Gac.II
	Stickleback	groupIII	12909582	ENSGacG00000017090		Gac.III
	Sea squirt	2q	5107003	ENSCING00000011418		Cin.2q
	Fruitfly	2R	3649801	CG8709		Dme.2R
	Florida lancelet	scaffold_39	2541384	e_gw.39.46.1		Bfl.sc39
	Florida lancelet	scaffold_252	572404	fgenesh2_pg.scaffold_252000033		Bfl.sc252
MATN (MATRILIN FLAGS)
	Human	8	98950487	ENSG00000132561	MATN2	Hsa.8.MATN2
	Human	2	20056353	ENSG00000132031	MATN3	Hsa.2.MATN3
	Human	20	43355499	ENSG00000124159	MATN4	Hsa.20.MATN4
	Human	1	30956711	ENSG00000162510	MATN1	Hsa.1.MATN1
	Dog	13	3192342	ENSCAFG00000013852		Cfa.13
	Dog	17	18014777	ENSCAFG00000003825		Cfa.17
	Dog	24	35578783	ENSCAFG00000009664		Cfa.24
	Dog	2	73117363	XP_544451.2		Cfa.2.XP_544451.2
	Opossum	3	362417355	ENSMODG00000006840		Mdo.3
	Opossum	1	501088649	ENSMODG00000016189		Mdo.1
	Opossum	4	431580081	ENSMODG00000017050		Mdo.4
	Chicken	23	217900	ENSGALG00000000548		Gga.23
	Chicken	20	5125411	ENSGALG00000004028		Gga.20
	Chicken	3	104310041	ENSGALG00000016478		Gga.3
	Chicken	2	132331904	ENSGALG00000014523		Gga.2
	Zebrafish	11	32885739	ENSDARG00000015947		Dre.11
	Zebrafish	19	41051259	ENSDARG00000030215		Dre.19
	Zebrafish	13	32111297	ENSDARG00000069265		Dre.13
	Zebrafish	20	45414913	ENSDARG00000069245		Dre.20
	Medaka	16	2388977	ENSORLG00000002891		Ola.16
	Medaka	11	21399266	ENSORLG00000011158		Ola.11
	Medaka	24	6057685	ENSORLG00000012543		Ola.24
	Medaka	scaffold3419	1200	GENSCAN00000003871		Ola.sc3419.Gsc	from Ensembl release 48 and 49
	Stickleback	scaffold_89	230109	ENSGacG00000000022		Gac.sc89
	Stickleback	groupX	8210063	ENSGacG00000005741		Gac.X
	Stickleback	groupXVIII	9394362	ENSGacG00000009713		Gac.XVIII
	Stickleback	groupXV	14277830	ENSGacG00000012967		Gac.XV
	Sea squirt	1p	4402012	ENSCING00000005241		Cin.1p
	Florida lancelet	scaffold_327	893513	gw.327.35.1		Bfl.sc327
MYB
	Human	8	67639486	ENSG00000185697	MYBL1	Hsa.8.MYBL1
	Human	20	41729123	ENSG00000101057	MYBL2	Hsa.20.MYBL2
	Human	6	135544146	ENSG00000118513	MYB	Hsa.6.MYB
	Dog	24	34319469	ENSCAFG00000009336		Cfa.24
	Dog	29	19160127	ENSCAFG00000007344		Cfa.29
	Dog	1	30947386	ENSCAFG00000000230		Cfa.1
	Opossum	3	170943595	ENSMODG00000007964		Mdo.3
	Opossum	1	390595039	ENSMODG00000001228		Mdo.1
	Opossum	2	410317555	ENSMODG00000017488		Mdo.2
	Chicken	20	3597679	ENSGALG00000003503		Gga.20
	Chicken	3	57630009	ENSGALG00000013956		Gga.3
	Chicken	2	119492433	ENSGALG00000015522		Gga.2
	Zebrafish	24	22373812	ENSDARG00000030999		Dre.24
	Zebrafish	11	420914	ENSDARG00000032264		Dre.11
	Zebrafish	23	30583834	ENSDARG00000053666		Dre.23
	Medaka	7	7353134	ENSORLG00000003483		Ola.7
	Medaka	20	15248487	ENSORLG00000008488		Ola.20
	Medaka	5	22529979	ENSORLG00000011602		Ola.5
	Medaka	24	14190190	ENSORLG00000016573		Ola.24
	Stickleback	groupXXI	7275543	ENSGacG00000002964		Gac.XXI
	Stickleback	groupXII	7518553	ENSGacG00000006055		Gac.XII
	Stickleback	groupXVII	10944236	ENSGacG00000010763		Gac.XVII
	Stickleback	groupXVIII	11108569	ENSGacG00000011054		Gac.XVIII
	Sea squirt	1p	195000	FGENESH00000068801		Cin.1p.fgenesh
	Fruitfly	X	15688769	CG9045		Dme.X
	Florida lancelet	scaffold_122	1669400	estExt_fgenesh2_pg.C_1220082		Bfl.sc122
MYOM (MYOMESIN)
	Human	18	3056806	ENSG00000101605	MYOM1	Hsa.18.MYOM1
	Human	8	1980612	ENSG00000036448	MYOM2	Hsa.8.MYOM2
	Human	1	24255112	ENSG00000142661	MYOM3	Hsa.1.MYOM3
	Dog	16	57313811	XP_548625.2		Cfa.16.XP_548625.2
	Dog	2	78376884	ENSCAFG00000013042		Cfa.2
	Dog	7	72743457	ENSCAFG00000018478		Cfa.7
	Dog	Un	401	XP_548567.2		Cfa.Un.XP_548567.2
	Opossum	3	268573875	ENSMODG00000021465		Mdo.3
	Opossum	4	360543512	ENSMODG00000013043		Mdo.4
	Opossum	1	549583344	ENSMODG00000014165		Mdo.1
	Chicken	23	5907058	ENSGALG00000004155		Gga.23
	Chicken	3	93565396	ENSGALG00000016342		Gga.3
	Chicken	2	104021867	ENSGALG00000014847		Gga.2
	Zebrafish	16	47321617	ENSDARG00000059838		Dre.16
	Zebrafish	2	25355038	ENSDARG00000061249		Dre.2
	Zebrafish	12	9437761	XP_693801.3		Dre.12.XP_693801.3
	Medaka	1	812677	ENSORLG00000000075		Ola.1
	Medaka	3	22273366	ENSORLG00000010005		Ola.3
	Medaka	20	18863658	ENSORLG00000011397		Ola.20
	Medaka	16	21418329	ENSORLG00000014861		Ola.16
	Medaka	17	30668232	ENSORLG00000017856		Ola.17
	Stickleback	groupXXI	9598721	ENSGacG00000004209		Gac.XXI
	Stickleback	groupXX	16897731	ENSGacG00000013620		Gac.XX
	Stickleback	groupII	12989830	ENSGacG00000016045		Gac.II
	Stickleback	groupIII	12926419	ENSGacG00000017095		Gac.III
	Stickleback	groupIX	19509274	ENSGacG00000019784		Gac.IX
	Sea squirt	scaffold_26	909285	ENSCING00000002800		Cin.sc26
	Florida lancelet	scaffold_88	1252262	fgenesh2_pg.scaffold_88000056		Bfl.sc88
MYT (NEURAL ZINC FINGER FACTOR)
	Human	8	53185952	ENSG00000147488	ST18	Hsa.8.ST18
	Human	2	1771894	ENSG00000186487	MYT1L	Hsa.2.MYT1L
	Human	20	62253588	ENSG00000196132	MYT1	Hsa.20.MYT1
	Dog	29	6979329	ENSCAFG00000006762		Cfa.29
	Dog	17	3899783	.XP_540068.2		Cfa.17.XP_540068.2
	Dog	24	50668298	ENSCAFG00000013222		Cfa.24
	Opossum	3	188739771	ENSMODG00000009635		Mdo.3
	Opossum	1	471863598	ENSMODG00000017076		Mdo.1.a
	Opossum	1	542210801	ENSMODG00000014378		Mdo.1.b
	Chicken	20	9096368	ENSGALG00000005932		Gga.20
	Chicken	3	95860590	ENSGALG00000016384		Gga.3
	Chicken	2	113060885	ENSGALG00000015254		Gga.20
	Zebrafish	17	46502541	ENSDARG00000006212		Dre.17
	Zebrafish	20	36935157	ENSDARG00000008209		Dre.20
	Zebrafish	8	52078	XP_697693.3		Dre.8.XP_697693.3
	Zebrafish	23	29535517	XP_685050.3		Dre.23.XP_685050.3
	Medaka	7	4853126	ENSORLG00000002252		Ola.7
	Medaka	17	28277254	ENSORLG00000017500		Ola.17
	Medaka	22	20085700	ENSORLG00000017852		Ola.22
	Medaka	24	23346361	ENSORLG00000018130		Ola.24
	Medaka	ultracontig90	2405466	ENSORLG00000020139		Ola.uc90
	Stickleback	groupXVIII	12696777	ENSGacG00000011952		Gac.XVIII
	Stickleback	groupXII	16955484	ENSGacG00000012816		Gac.XII.a
	Stickleback	groupXII	18163480	ENSGacG00000013224		Gac.XII.b
	Stickleback	groupXV	15759319	ENSGacG00000013255		Gac.XV
	Stickleback	groupIII	16479364	ENSGacG00000017947		Gac.III
	Sea squirt	1q	1547975	ENSCING00000007794		Cin.1q
	Fruitfly	X	3925374	CG32778		Dme.X
	Florida lancelet	scaffold_123	425765	estExt_fgenesh2_pg.C_1230027		Bfl.sc123
NCOA (NUCLEAR RECEPTOR COACTIVATOR 2)
	Human	8	71196006	ENSG00000140396	NCOA2	Hsa.8.NCOA2
	Human	2	24660850	ENSG00000084676	NCOA1	Hsa.2.NCOA1
	Human	20	45564053	ENSG00000124151	NCOA3	Hsa.20.NCOA3
	Dog	29	22258983	ENSCAFG00000007775		Cfa.19
	Dog	24	37671097	ENSCAFG00000010812		Cfa.24
	Dog	17	21996972	ENSCAFG00000004075		Cfa.17
	Opossum	3	166754995	ENSMODG00000007376		Mdo.3
	Opossum	1	498638022	ENSMODG00000016243		Mdo.1.a
	Opossum	1	504958433	ENSMODG00000015907		Mdo.1.b
	Chicken	20	5849745	ENSGALG00000004570		Gga.20
	Chicken	3	108258004	ENSGALG00000016617		Gga.3
	Chicken	2	121054027	ENSGALG00000015607		Gga.2
	Zebrafish	24	17674611	ENSDARG00000017929		Dre.24
	Zebrafish	11	17143000	GENSCAN00000010527		Dre.11.Gsc
	Zebrafish	20	38182090	XP_691744.2		Dre.20.XP_691744.2
	Medaka	17	7504628	ENSORLG00000005783		Ola.17
	Medaka	20	14741020	ENSORLG00000008098		Ola.20
	Medaka	7	19335562	ENSORLG00000012143		Ola.7
	Medaka	5	26625045	ENSORLG00000013704		Ola.5
	Stickleback	groupXXI	6911713	ENSGacG00000002822		Gac.XXI
	Stickleback	groupXVIII	4961176	ENSGacG00000006727		Gac.XVIII
	Stickleback	groupXVII	10314014	ENSGacG00000010036		Gac.XVII
	Stickleback	scaffold_68	728889	ENSGacG00000015221		Gac.sc68
	Stickleback	groupIII	14423942	ENSGacG00000017565		Gac.III
	Florida lancelet	scaffold_47	2556074	e_gw.47.74.1		Bfl.sc47
	Fruitfly	2L	9166802	34242		Dme.2L
NKAIN (NA + /K + TRANSPORTING ATPASE SUBUNIT BETA 1 INTERACTING)
	Human	8	63324055	NP_775959.1	NKAIN3	Hsa.8.NKAIN3
	Human	20	61342581	ENSG00000101198	NKAIN4	Hsa.20.NKAIN4
	Human	1	31425179	ENSG00000084628	NKAIN1	Hsa.1.NKAIN1
	Human	6	124166985	ENSG00000188580	NKAIN2	Hsa.6.NKAIN2
	Dog	24	50004384	ENSCAFG00000012785		Cfa.24
	Dog	1	66278074	ENSCAFG00000001026		Cfa.1
	Dog	2	72699009	ENSCAFG00000011175		Cfa.2
	Dog	29	15705570	XP_852221.1		Cfa.29.XP_852221.1
	Opossum	3	175785964	ENSMODG00000008298		Mdo.3*
	Opossum	2	395455966	ENSMODG00000025688		Mdo.2*
	Opossum	1	474564078	ENSMODG00000016845		Mdo.1*
	Opossum	4	430876175	ENSMODG00000017074		Mdo.4
	Chicken	23	516633	ENSGALG00000000604		Gga.23
	Chicken	20	8720738	ENSGALG00000005774		Gga.20
	Chicken	3	62760838	XP_419756.1		Gga.3.XP_419756.1
	Chicken	2	117719340	ENSGALG00000015501		Gga.2
	Zebrafish	23	15000100	XP_001337586.1		Dre.23.XP_001337586.1
	Zebrafish	20	40979316	ENSDARG00000069427		Dre.20*
	Zebrafish	19	43667348	zgc:65908		Dre.19
	Medaka	7	16185201	ENSORLG00000009717		Ola.7
	Medaka	24	15713874	ENSORLG00000017063		Ola.24
	Stickleback	groupXII	193052	ENSGacG00000002604		Gac.XII
	Stickleback	groupX	8138395	ENSGacG00000005700		Gac.X
	Stickleback	groupXVIII	15399767	ENSGacG00000013248		Gac.XVIII
	Sea squirt	2q	7447997	ENSCING00000006696		Cin.2q
	Fruitfly	2R	20389169	CG9047		Dme.2R
	Florida lancelet	scaffold_1	221446	e_gw.1.198.1		Bfl.sc1
OPIOID PEPTIDE
	Human	2	25237226	ENSG00000115138	POMC	Human.POMC
	Human	8	28230568	ENSG00000168081	PNOC	Human.PNOC
	Human	8	57516071	ENSG00000181195	PENK	Human.PENK
	Human	20	1907403	ENSG00000101327	PDYN	Human.PDYN
	Mouse	12	3954967	ENSMUSG00000020660		Mouse.POMC
	Mouse	14	64354783	ENSMUSG00000045731		Mouse.PNOC
	Mouse	4	4060680	ENSMUSG00000045573		Mouse.PENK
	Mouse	2	129378007	ENSMUSG00000027400		Mouse.PDYN
	Dog	17	22412656	ENSCAFG00000004149		DogPOMC	manual edited
	Dog	25	32216190	ENSCAFG00000008307		DogPNOC
	Dog	29	10762347	ENSCAFG00000007063		DogPENK	manual edited
	Dog	24	22051004	ENSCAFG00000006748		DogPDYN
	Opossum	1	505581577	ENSMODG00000015853		OpossumPOMC
	Opossum	1	589277501	ENSMODG00000008656		OpossumPNOC
	Opossum	3	183664636	ENSMODG00000008973		OpossumPENK
	Opossum	1	450744175	ENSMODG00000013953		OpossumPDYN
	Chicken	3	108171917	ENSGALG00000016600		ChickenPOMC
	Chicken	2	115072225	ENSGALG00000015419		ChickenPENK
	Chicken	3	108461808	XP_420026.2		ChickenPNOC
	Frog	scaffold_1372	74485	ENSXETG00000017532		FrogPOMC
	Frog	scaffold_83	2846449	ENSXETG00000005657		FrogPENK
	Frog	scaffold_470	332120	ENSXETG00000021158		FrogPNOC
	Frog	scaffold_6499	2679	GENSCAN00000042224		FrogPDYN
	Zebrafish	17	27185952	ENSDARG00000043135		ZebrafishPOMCa
	Zebrafish	17	14666997	ENSDARG00000025024		ZebrafishPNOCa
	Zebrafish	20	44130762	ENSDARG00000069307		ZebrafishPOMCb
	Zebrafish	20	32528122	ENSDARG00000024189		ZebrafishPNOCb
	Zebrafish	2	8159417	ENSDARG00000004869		ZebrafishPENKb
	Zebrafish	7	57677167	ENSDARG00000036045		ZebrafishPENKa
	Zebrafish	23	38479400	ENSDARG00000070188		ZebrafishPDYN
	Medaka	2	17561951	ENSORLG00000001386		MedakaPOMCa	manual edited
	Medaka	24	8791353	ENSORLG00000014880		MedakaPOMCb
	Medaka	ultracontig90	888176	ENSORLG00000018801		MedakaPDYN
	Medaka	3	30768736	ENSORLG00000014513		MedakaPNOCa
	Medaka	17	5174066	Blasthit		MedakaPENK	Blasthit
	Medaka	24	13401604	ENSORLG00000016198		MedakaPNOCb	manual edited
	Stickleback	groupX	14658688	ENSSticklebackG00000009521		SticklebackPOMCa	manual edited
	Stickleback	groupXVIII	9910064	ENSSticklebackG00000010098		SticklebackPOMCb	manual edited
	Stickleback	groupIII	5563926	ENSSticklebackG00000014732		SticklebackPENK
	Stickleback	groupXII	2350366	ENSSticklebackG00000003616		SticklebackPDYN
	Stickleback	groupXVIII	1089451	ENSSticklebackG00000004461		SticklebackPNOCb	manual edited
	Stickleback	groupII	5013464	ENSSticklebackG00000014805		SticklebackPNOCa
	Zebrafinch	20	8457826	GENSCAN00000000269		ZebrafinchPDYN	manual edited
OPR/NPBWR (RECEPTOR)
	Human	8	54013546	ENSG00000183729	NPBWR1	Hsa.8.NPBWR1
	Human	8	54300829	ENSG00000082556	OPRK1	Hsa.8.OPRK1
	Human	20	62181932	ENSG00000125510	OPRL1	Hsa.20.OPRL1
	Human	20	62207617	ENSG00000125522	NPBWR2	Hsa.20.NPBWR2
	Human	1	29011241	ENSG00000116329	OPRD1	Hsa.1.OPRD1
	Human	6	154402136	ENSG00000112038	OPRM1	Hsa.6.OPRM1
	Dog	29	8032428	ENSCAFG00000006891		Cfa.29
	Dog	29	7778507	XP_544078.2		Cfa.29.XP_544078.2
	Dog	24	50594977	ENSCAFG00000013179		Cfa.24
	Dog	1	47018028	ENSCAFG00000000556		Cfa.1
	Dog	2	74579838	ENSCAFG00000011689		Cfa.2
	Opossum	3	187418809	ENSMODG00000009510		Mdo.3.a
	Opossum	3	187778625	ENSMODG00000009573		Mdo.3.b
	Opossum	4	368032073	ENSMODG00000011019		Mdo.4
	Opossum	2	434892900	ENSMODG00000008382		Mdo.2
	Opossum	1	472322069	ENSMODG00000017070		Mdo.1.b
	Opossum	1	472359129	ENSMODG00000017068		Mdo.1.a
	Chicken	23	2484207	XP_427506.2		Gga.23.XP_427506.2
	Chicken	20	9247416	ENSGALG00000005949		Gga.20
	Chicken	3	51939025	ENSGALG00000013616		Gga.3
	Chicken	2	113581205	ENSGALG00000015261		Gga.2.b
	Chicken	2	113641391	ENSGALG00000015269		Gga.2.a
	Zebrafish	23	6024852	ENSDARG00000071209		Dre.23
	Zebrafish	19	21352703	ENSDARG00000041660		Dre.19
	Zebrafish	16	40670880	ENSDARG00000037159		Dre.16
	Zebrafish	13	25214470	ENSDARG00000039434		Dre.13
	Zebrafish	2	25311320	ENSDARG00000006894		Dre.2
	Zebrafish	23	7663468	NP_001025429.1		Dre.23.NP_001025429.1
	Medaka	15	16503030	ENSORLG00000004921		Ola.15
	Medaka	11	18267139	ENSORLG00000008447		Ola.11
	Medaka	20	18909612	ENSORLG00000011442		Ola.20
	Medaka	7	27826685	ENSORLG00000016815		Ola.7
	Medaka	17	30640849	ENSORLG00000017839		Ola.17
	Stickleback	groupXXI	9633015	ENSGACG00000004282		Gac.XXI
	Stickleback	groupXX	8215215	ENSGACG00000007300		Gac.XX
	Stickleback	groupX	11573723	ENSGACG00000007694		Gac.X
	Stickleback	groupVI	12875851	ENSGACG00000010365		Gac.VI
	Stickleback	groupXII	13219071	ENSGACG00000010477		Gac.XII.a
	Stickleback	groupXII	13262291	ENSGACG00000010479		Gac.XII.b
	Stickleback	groupIII	12956203	ENSGACG00000017114		Gac.III
	Fruitfly	3L	18451761	CG13702		Dme.3L.a
	Fruitfly	3L	18525517	CG7285		Dme.3L.b
	Florida lancelet	scaffold_168	913517	fgenesh2_pg.scaffold_168000048		Bfl.sc.168
PHACTR (PHOSPHATASE AND ACTIN REGULATOR)
	Human	6	12825879	ENSG00000112137	PHACTR1	Hsa.6.PHACTR1
	Human	20	57585959	ENSG00000087495	PHACTR3	Hsa.20.PHACTR3
	Human	1	28568701	ENSG00000204138	PHACTR4	Hsa.1.PHACTR4
	Human	6	143971093	ENSG00000112419	PHACTR2	Hsa.6.PHACTR2
	Dog	2	74879297	ENSCAFG00000011801		Cfa.2
	Dog	35	15546943	ENSCAFG00000009809		Cfa.35
	Dog	24	47347682	ENSCAFG00000012258		Cfa.24
	Dog	1	38297782	ENSCAFG00000000312		Cfa.1
	Opossum	3	328146511	ENSMODG00000010580		Mdo.3
	Opossum	4	367654521	ENSMODG00000010884		Mdo.4
	Opossum	2	421936163	ENSMODG00000017255		Mdo.2
	Opossum	1	482796994	ENSMODG00000016615		Mdo.1
	Chicken	23	2460097	ENSGALG00000002871		Gga.23
	Chicken	20	6756750	ENSGALG00000004873		Gga.20
	Chicken	3	54236491	ENSGALG00000013768		Gga.3
	Chicken	2	63373559	ENSGALG00000012732		Gga.2
	Zebrafish	11	240468	ENSDARG00000058243		Dre.11.a
	Zebrafish	11	282105	ENSDARG00000019304		Dre.11.b
	Zebrafish	19	21576343	ENSDARG00000015552		Dre.19
	Zebrafish	16	40709298	ENSDARG00000032221		Dre.16
	Zebrafish	13	25141239	ENSDARG00000027172		Dre.13
	Zebrafish	20	55411691	ENSDARG00000023916		Dre.20
	Medaka	7	9099191	ENSORLG00000004870		Ola.7
	Medaka	15	16539327	ENSORLG00000004937		Ola.15
	Medaka	11	18257751	ENSORLG00000008432		Ola.11
	Medaka	5	22571920	ENSORLG00000011725		Ola.5
	Medaka	4	22653994	ENSORLG00000012847		Ola.4
	Medaka	17	27114189	ENSORLG00000017195		Ola.17
	Medaka	scaffold378	417600	ENSORLG00000019876		Ola.sc378
	Stickleback	groupVIII	3390428	ENSGacG00000004884		Gac.VIII
	Stickleback	groupXII	8827198	ENSGacG00000006945		Gac.XII
	Stickleback	groupXX	8232192	ENSGacG00000007346		Gac.XX
	Stickleback	groupX	11594000	ENSGacG00000007702		Gac.X
	Stickleback	groupVI	12851057	ENSGacG00000010350		Gac.VI
	Stickleback	groupXVII	10972558	ENSGacG00000010815		Gac.XVII
	Stickleback	groupIII	526486	ENSGacG00000013017		Gac.III
	Sea squirt	scaffold_92	194170	ENSCING00000014814		Cin.sc92
	Fruitfly	3L	3700729	CG32264		Dme.3L
	Florida lancelet	scaffold_554	271882	e_gw.554.6.1		Bfl.sc554
PTR (RECEPTOR TYPE TYROSINE PHOSPHATASE SHORT)
	Human	18	7557817	ENSG00000173482	PTPRM	Hsa.18.PTPRM
	Human	20	40134806	ENSG00000196090	PTPRT	Hsa.20.PTPRT
	Human	1	29435615	ENSG00000060656	PTPRU	Hsa.1.PTPRU
	Human	6	128331627	ENSG00000152894	PTPRK	Hsa.6.PTPRK
						Cfa.24.ba*	edited sequence, beginning from Cfa.24.b and end from Cfa.24.a
	Dog	24	32972901	ENSCAFG00000009280		Cfa.24.a
	Dog	24	33551649	ENSCAFG00000023725		Cfa.24.b
	Dog	1	69653331	XP_533495.2		Cfa.1.XP_533495.2
	Dog	2	74176904	ENSCAFG00000011524		Cfa.2
						Cfa.7ab*	edited sequence, beginning from Cfa.7.a and end from Cfa.7.b
	Dog	7	77047289	ENSCAFG00000023271		Cfa.7.a
	Dog	7	77329631	ENSCAFG00000018639		Cfa.7.b
	Opossum	3	274653187	ENSMODG00000021453		Mdo.3
	Opossum	1	391340148	ENSMODG00000001198		Mdo.1
	Opossum	2	400417188	ENSMODG00000017661		Mdo.2
	Chicken	23	3064234	ENSGALG00000001443		Gga.23
	Chicken	20	2952172	ENSGALG00000003488		Gga.20
	Chicken	3	60905425	ENSGALG00000014783		Gga.3
	Chicken	2	101673853	ENSGALG00000013902		Gga.2
	Zebrafish	24	39079452	XP_001340355.2		Dre.24.XP_001340355.2
	Zebrafish	20	1213496	ENSDARG00000063416		Dre.20
	Zebrafish	19	22637113	ENSDARG00000056471		Dre.19
	Zebrafish	6	47846839	XP_695476.3		Dre.6.XP_695476.3
	Zebrafish	16	41675811	ENSDARG00000059949		Dre.16
	Medaka	11	17772698	ENSORLG00000008339		Ola.11
	Medaka	5	18022583	ENSORLG00000009770		Ola.5
	Medaka	24	4381671	ENSORLG00000011255		Ola.24
	Medaka	ultracontig236	1609430	ENSORLG00000019666		Ola.uc236
	Medaka	ultracontig200	347241	ENSORLG00000019816		Ola.uc200
	Medaka	ultracontig182	3560549	ENSORLG00000020763		Ola.uc182
	Stickleback	scaffold_89	404287	ENSGacG00000000039		Gac.sc89
	Stickleback	scaffold_146	103974	ENSGacG00000001160		Gac.sc146
	Stickleback	groupXX	8409773	ENSGacG00000007392		Gac.XX
	Stickleback	groupX	11796739	ENSGacG00000007773		Gac.X
	Stickleback	groupXVIII	7308267	ENSGacG00000008077		Gac.XVIII
	Stickleback	groupIII	11323462	ENSGacG00000016677		Gac.III
	Sea squirt	scaffold_274	46885	ENSCING00000002433		Cin.sc274
	Fruitfly	2L	18176921	CG7180		Dme.2L
	Florida lancelet	scaffold_244	516820	fgenesh2_pg.scaffold_244000034		Bfl.sc244
	Florida lancelet	scaffold_101	785621	estExt_gwp.C_1010065		Bfl.sc101
RGS (REGULATOR OF G SIGNALING)
	Human	8	54926921	ENSG00000147509	RGS20	Hsa.8.RGS20
	Human	20	62174981	ENSG00000171700	RGS19	Hsa.20.RGS19
	Human	6	153373550	ENSG00000091844	RGS17	Hsa.6.RGS17
	Dog	29	8528274	ENSCAFG00000006955		Cfa.29
	Dog	24	50562575	ENSCAFG00000015179		Cfa.24
	Dog	1	46220148	ENSCAFG00000000550		Cfa.1
	Opossum	3	186655296	ENSMODG00000009398		Mdo.3
	Opossum	2	433180802	ENSMODG00000008463		Mdo.2
	Opossum	1	472462094	ENSMODG00000017062		Mdo.1
	Chicken	20	9061872	NP_989560.1		Gga.20.NP_989560.1
	Chicken	3	51528168	ENSGALG00000013611		Gga.3
	Chicken	2	113829080	ENSGALG00000015270		Gga.2
	Zebrafish	13	25340747	ENSDARG00000039435		Dre.13
	Zebrafish	2	25190277	ENSDARG00000038859		Dre.2
	Zebrafish	23	6248706	XP_699256.3		Dre.23.XP_699256.3
	Medaka	15	16369475	ENSORLG00000004914		Ola.15
	Medaka	20	18987531	ENSORLG00000011462		Ola.20
	Medaka	7	27281642	ENSORLG00000016793		Ola.7
	Medaka	17	30584840	ENSORLG00000017826		Ola.17
	Stickleback	groupXXI	9656880	ENSGacG00000004297		Gac.XXI
	Stickleback	groupVI	12914845	ENSGacG00000010373		Gac.VI
	Stickleback	groupXII	13344074	ENSGacG00000010490		Gac.XII
	Stickleback	groupIII	12987145	ENSGacG00000017139		Gac.III
	Fruitfly	2R	13307745	CG5036		Dme.2R
	Florida lancelet	scaffold_170	509201	fgenesh2_pg.scaffold_170000020		Bfl.sc170
RIMS (REGULATING SYNAPTIC MEMBRANE EXOCYTOSIS)
	Human	8	104582291	ENSG00000176406	RIMS2	Hsa.8.RIMS2
	Human	20	42813863	ENSG00000101098	RIMS4	Hsa.20.RIMS4
	Human	6	72653127	ENSG00000079841	RIMS1	Hsa.6.RIMS1
	Human	1	40858938	ENSG00000117016	RIMS3	Hsa.1.RIMS3
	Dog	15	5379316	ENSCAFG00000002830		Cfa.15
	Dog	24	35175524	ENSCAFG00000009526		Cfa.24
	Dog	13	8026825	ENSCAFG00000000670		Cfa.13
	Dog	12	37384930	ENSCAFG00000002640		Cfa.12
	Opossum	3	370464170	ENSMODG00000005498		Mdo.3
	Opossum	2	323875047	ENSMODG00000018557		Mdo.2
	Opossum	1	500539413	ENSMODG00000016202		Mdo.1
	Opossum	4	424553222	ENSMODG00000017587		Mdo.4
	Chicken	23	5217902	ENSGALG00000003174		Gga.23
	Chicken	20	5270862	ENSGALG00000004146		Gga.20
	Chicken	3	84685442	ENSGALG00000015944		Gga.3
	Chicken	2	134996967	ENSGALG00000016074		Gga.2
	Zebrafish	19	15888695	ENSDARG00000062305		Dre.19.a
	Zebrafish	19	24223216	ENSDARG00000035994		Dre.19.b
	Zebrafish	6	53171157	ENSDARG00000059523		Dre.6
	Zebrafish	16	33132660	ENSDARG00000019622		Dre.16
	Zebrafish	1	26176146	ENSDARG00000013690		Dre.1
	Zebrafish	13	21308866	XP_001920695.1		Dre.13.XP_001920695.1
	Medaka	11	3709733	ENSORLG00000001636		Ola.11.a
	Medaka	15	7823771	ENSORLG00000001748		Ola.15
	Medaka	16	1195287	ENSORLG00000002417		Ola.16
	Medaka	1	10134759	ENSORLG00000002571		Ola.1
	Medaka	11	10799588	ENSORLG00000005207		Ola.11.b
	Medaka	5	17428314	ENSORLG00000009518		Ola.5
	Stickleback	groupXVII	772640	ENSGacG00000003513		Gac.XVII
	Stickleback	groupVI	4275285	ENSGacG00000004016		Gac.VI
	Stickleback	groupXX	2896903	ENSGacG00000004824		Gac.XX
	Stickleback	groupX	10064896	ENSGacG00000007223		Gac.X.a
	Stickleback	groupX	15505619	ENSGacG00000010376		Gac.X.b
	Stickleback	groupIX	9971036	ENSGacG00000018104		Gac.IX
	Fruitfly	3R	13700748	CG33547		Dme.3R
	Florida lancelet	scaffold_55	749881-751077	e_gw.55.152.1		Bfl.sc55
	Florida lancelet	scaffold_184	1371358-1388507	fgenesh2_pg.scaffold_184000063		Bfl.sc184
RSPO (R SPONDIN 2)
	Human	8	108980721	ENSG00000147655	RSPO2	Hsa.8.RSPO2
	Human	20	887098	ENSG00000101282	RSPO4	Hsa.20.RSPO4
	Human	6	127481442	ENSG00000146374	RSPO3	Hsa.6.RSPO3
	Human	1	37849538	ENSG00000169218	RSPO1	Hsa.1.RSPO1
	Dog	24	22951864	ENSCAFG00000006836		Cfa.24
	Dog	13	11685070	ENSCAFG00000000696		Cfa.13
	Dog	15	7872864	ENSCAFG00000003280		Cfa.15
	Dog	1	68940900	ENSCAFG00000001067		Cfa.1
	Opossum	3	375601619	ENSMODG00000005246		Mdo.3
	Opossum	1	403597088	ENSMODG00000019537		Mdo.1
	Opossum	2	399323163	ENSMODG00000017677		Mdo.2
	Opossum	4	421153037	ENSMODG00000023326		Mdo.4
	Chicken	23	4008468	ENSGALG00000001946		Gga.23
	Chicken	20	9851996	ENSGALG00000023640		Gga.20
	Chicken	3	61551289	ENSGALG00000014829		Gga.3
	Chicken	2	137304752	ENSGALG00000016084		Gga.2
	Zebrafish	16	30963820	ENSDARG00000070081		Dre.16.a
	Zebrafish	6	52917517	ENSDARG00000038593		Dre.6
	Zebrafish	16	40211655	ENSDARG00000039957		Dre.16.b
	Medaka	16	10874736	ENSORLG00000005755		Ola.16.a
	Medaka	16	20925341	ENSORLG00000014653		Ola.16.b
	Medaka	ultracontig182	900038	ENSORLG00000020705		Ola.uc182
	Stickleback	groupXX	3878712	ENSGacG00000005408		Gac.XX.a
	Stickleback	groupXX	5553263	ENSGacG00000006080		Gac.XX.b
	Stickleback	groupXX	17223600	ENSGacG00000013691		Gac.XX.c
	Sea squirt	2q	2568883	ENSCING00000004908		Cin.2q
	Florida lancelet	scaffold_78	410332-412277	e_gw.78.23.1		Bfl.sc78*	manual edited
SERINC (SERINE INCORPORATOR)
	Human	20	42558279	ENSG00000132824	SERINC3	Hsa.20.SERINC3
	Human	1	31654999	ENSG00000168528	SERINC2	Hsa.1.SERINC2
	Human	6	122806195	ENSG00000111897	SERINC1	Hsa.6.SERINC1
	Dog	1	64870155	ENSCAFG00000000989		Cfa.1
	Dog	24	34935957	ENSCAFG00000009471		Cfa.24
	Dog	2	72492379	ENSCAFG00000011063		Cfa.2
	Opossum	1	376721950	ENSMODG00000005891		Mdo.1.b
	Opossum	2	393082889	ENSMODG00000017743		Mdo.2
	Opossum	1	500247972	ENSMODG00000016210		Mdo.1.a
	Opossum	4	430617841	ENSMODG00000017090		Mdo.4
	Chicken	23	585462	NP_001026061.1		Gga.23.NP_001026061.1
	Chicken	20	5362845	ENSGALG00000004220		Gga.20
	Chicken	3	63939040	ENSGALG00000014868		Gga.3
	Zebrafish	11	1050244	ENSDARG00000018900		Dre.11
	Zebrafish	19	21823269	ENSDARG00000056532		Dre.19
	Zebrafish	16	41093233	ENSDARG00000053425		Dre.16
	Zebrafish	20	41538661	ENSDARG00000009106		Dre.20
	Medaka	11	18152835	ENSORLG00000008397		Ola.11
	Medaka	5	18447165	ENSORLG00000009959		Ola.5
	Medaka	24	9996406	ENSORLG00000015533		Ola.24
	Medaka	scaffold378	145012	ENSORLG00000019865		Ola.sc378
	Stickleback	groupXVIII	144678	ENSGacG00000004029		Gac.XVIII
	Stickleback	groupXX	8295078	ENSGacG00000007354		Gac.XX
	Stickleback	groupX	11660822	ENSGacG00000007719		Gac.X
	Stickleback	groupXVII	12399600	ENSGacG00000011426		Gac.XVII
	Sea squirt	2q	486934	ENSCING00000004218		Cin.2q
	Fruitfly	3L	16378014	CG4672		Dme.3L
	Florida lancelet	scaffold_1	5439383	estExt_fgenesh2_pg.C_10285		Bfl.sc1
	Florida lancelet	scaffold_246	813488	estExt_fgenesh2_pg.C_2460040		Bfl.sc246
SRC-B (KINASE EC=2 7 10 2)
	Human	18	711747	ENSG00000176105	YES1	Hsa.18.YES1
	Human	8	11388919	ENSG00000136573	BLK	Hsa.8.BLK
	Human	8	56954926	ENSG00000147507	LYN	Hsa.8.LYN
	Human	20	30103715	ENSG00000101336	HCK	Hsa.20.HCK
	Human	20	35406502	ENSG00000197122	SRC	Hsa.20.SRC
	Human	1	27811162	ENSG00000000938	FGR	Hsa.1.FGR
	Human	6	112088228	ENSG00000010810	FYN	Hsa.6.FYN
	Human	1	32489480	ENSG00000182866	LCK	Hsa.1.LCK
	Dog	25	29322016	ENSCAFG00000007963		Cfa.25
	Dog	29	10392938	ENSCAFG00000007034		Cfa.29
	Dog	24	24442757	ENSCAFG00000007122		Cfa.24
	Dog	2	71833711	ENSCAFG00000010625		Cfa.2
	Opossum	3	184097749	ENSMODG00000009142		Mdo.3
	Opossum	1	401383162	ENSMODG00000019471		Mdo.1.a
	Opossum	4	425643851	XP_001366215.1		Mdo.4.XP_001366215.1
	Opossum	1	560170712	ENSMODG00000011985		Mdo.1.b
	Chicken	23	5396005	P42683.2		Gga.23.P42683.2
	Chicken	20	10063280	ENSGALG00000006522		Gga.20
	Chicken	2	114794126	ENSGALG00000018967		Gga.2
	Chicken	3	110052753	ENSGALG00000016661		Gga.3
	Zebrafish	17	1131202	ENSDARG00000059282		Dre.17
	Zebrafish	23	5504550	ENSDARG00000058647		Dre.23
	Zebrafish	20	19284252	ENSDARG00000007783		Dre.20
	Zebrafish	2	47651802	ENSDARG00000031715		Dre.2
	Medaka	7	5018459	ENSORLG00000002368		Ola.7
	Medaka	17	19666302	ENSORLG00000012708		Ola.17
	Medaka	24	13780072	ENSORLG00000016355		Ola.24
	Medaka	22	16562406	ENSORLG00000017495		Ola.22
	Stickleback	groupXII	2607678	ENSGacG00000003658		Gac.XII
	Stickleback	groupXV	4137556	ENSGacG00000007232		Gac.XV
	Stickleback	groupXVIII	10790432	ENSGacG00000010799		Gac.XVIII
	Stickleback	groupIII	4031366	ENSGacG00000014381		Gac.III
	Sea squirt	scaffold_2330	4	ENSCING00000003850		Cin.sc2330
	Sea squirt	scaffold_65	339858	ENSCING00000008550		Cin.sc65
	Florida lancelet	scaffold_740	93410	estExt_gwp.C_7400010		Bfl.sc740
STMN (STATHMIN 4)
	Human	8	27148757	ENSG00000015592	STMN4	Hsa.8.STMN4
	Human	8	80711591	ENSG00000104435	STMN2	Hsa.8.STMN2	From Ensembl release 49
	Human	20	61741505	ENSG00000197457	STMN3	Hsa.20.STMN3
	Human	1	26099180	ENSG00000117632	STMN1	Hsa.1.STMN1
	Dog	25	33335439	ENSCAFG00000008715		Cfa.25
	Dog	29	30054863	ENSCAFG00000008386		Cfa.29
	Dog	24	50256234	ENSCAFG00000013020		Cfa.24
	Dog	2	76928715	ENSCAFG00000012738		Cfa.2
	Opossum	3	154636696	ENSMODG00000006671		Mdo.3
	Opossum	4	363072570	ENSMODG00000014027		Mdo.4
	Opossum	1	473394594	ENSMODG00000016978		Mdo.1.a
	Opossum	1	504670401	ENSMODG00000015911		Mdo.1.b
	Chicken	23	3539770	ENSGALG00000001475		Gga.23
	Chicken	20	9675163	ENSGALG00000006130		Gga.20
	Chicken	3	108147355	ENSGALG00000016597		Gga.3
	Chicken	2	125412754	ENSGALG00000015736		Gga.2
	Zebrafish	17	10378857	ENSDARG00000043932		Dre.17
	Zebrafish	16	11902413	ENSDARG00000033234		Dre.16.a
	Zebrafish	19	23584897	ENSDARG00000004169		Dre.19.a
	Zebrafish	19	27142581	ENSDARG00000070537		Dre.19.b
	Zebrafish	20	32461026	ENSDARG00000030106		Dre.20
	Zebrafish	6	58556363	ENSDARG00000038465		Dre.6
	Zebrafish	16	41157711	ENSDARG00000033655		Dre.16.b
	Medaka	16	13704899	ENSORLG00000008251	STMN2	Ola.16
	Medaka	11	22921432	ENSORLG00000012936	STMN2	Ola.11
	Medaka	24	13331472	ENSORLG00000016161		Ola.24
	Medaka	ultracontig49	85680	ENSORLG00000018354	STMN4	Ola.uc49
	Stickleback	scaffold_944	622	ENSGacG00000000176	STMN4	Gac.sc944
	Stickleback	groupX	4620701	ENSGacG00000003409	STMN2	Gac.X.a
	Stickleback	groupXVIII	1131291	ENSGacG00000004482	STMN4	Gac.XVIII
	Stickleback	groupXX	8300736	ENSGacG00000007379		Gac.XX.a
	Stickleback	groupX	11693269	ENSGacG00000007747	STMN1	Gac.X.b
	Stickleback	groupXX	10080770	ENSGacG00000008708	STMN2	Gac.XX.b
	Fruitfly	2L	6100378	CG31641		Dme.2L
	Florida lancelet	scaffold_278	230109	estExt_gwp.C_2780014		Bfl.sc278
TFAP2 (TRANSCRIPTION FACTOR AP 2 SHORT)
	Human	6	10504906	ENSG00000137203	TFAP2A	Hsa.6.TFAP2A
	Human	20	54637765	ENSG00000087510	TFAP2C	Hsa.20.TFAP2C
	Human	6	50894542	ENSG00000008196	TFAP2B	Hsa.6.TFAP2B
	Human	1	35811558	ENSG00000116819	TFAP2E	Hsa.1.TFAP2E
	Dog	24	44768481	XP_543065.2		Cfa.24.XP_543065.2
	Dog	12	21546575	ENSCAFG00000002156		Cfa.12
	Dog	35	13165931	.XP_848968.1		Cfa.35.XP_848968.1
	Opossum	3	332011599	ENSMODG00000010299		Mdo.3
	Opossum	2	298600241	ENSMODG00000018831		Mdo.2
	Opossum	1	487628739	ENSMODG00000016445		Mdo.1
	Opossum	4	418267371	ENSMODG00000017904		Mdo.4
	Chicken	23	4606459	ENSGALG00000002393		Gga.23
	Chicken	20	11902384	ENSGALG00000007690		Gga.20
	Chicken	2	64442683	ENSGALG00000012775		Gga.2
	Chicken	3	111026380	ENSGALG00000016680		Gga.3
	Zebrafish	24	10972496	ENSDARG00000059279		Dre.24
	Zebrafish	20	49168013	ENSDARG00000012667		Dre.20.b
	Zebrafish	Zv7_NA831	32824	ENSDARG00000008861		Dre.Zv7_NA831
	Zebrafish	6	57622116	NP_001008576.1		Dre.NP_001008576.1
	Medaka	5	11344528	ENSORLG00000006158		Ola.5
	Medaka	20	11097712	ENSORLG00000006633		Ola.20
	Medaka	24	19518707	ENSORLG00000017695		Ola.24*	Manual edited
	Stickleback	groupXXI	4261159	ENSGacG00000002334		Gac.XXI
	Stickleback	groupX	2650823	ENSGacG00000002672		Gac.X
	Stickleback	groupXVII	4229146	ENSGacG00000005944		Gac.XVII
	Stickleback	groupXVIII	6109801	ENSGacG00000007277		Gac.XVIII
	Sea squirt	scaffold_65	227911	ENSCING00000003722		Cin.sc65
	Fruitfly	3L	21532699	CG7807		Dme.3L
	Florida lancelet	scaffold_327	776722	e_gw.327.57.1		Bfl.sc327
XKR (XK RELATED)
	Human	8	10791075	ENSG00000171044	XKR6	Hsa.8.XKR6
	Human	8	56177603	ENSG00000206579	XKR4	Hsa.8.XKR4
	Human	8	71744154	ENSG00000198669	XKR9	Hsa.8.XKR9
	Human	20	30019466	ENSG00000101321	XKR7	Hsa.20.XKR7
	Human	1	28158560	ENSG00000158156	XKR8	Hsa.1.XKR8
	Dog	29	9645394	ENSCAFG00000006999		Cfa.29.a
	Dog	29	22766139	ENSCAFG00000025085		Cfa.29
	Dog	25	29982192	ENSCAFG00000008074		Cfa.25.b
	Dog	24	24372295	ENSCAFG00000007118		Cfa.24
	Dog	2	75311212	ENSCAFG00000011967		Cfa.2
	Opossum	3	166137635	ENSMODG00000024976		Mdo.3.a
						Mdo.3.cb	edited sequence, beginning from Mdo.3.c and end from Mdo.3.b
	Opossum	3	184603422	ENSMODG00000025611		Mdo.3.b
	Opossum	3	185134977	ENSMODG00000009188		Mdo.3.c
	Opossum	4	367132414	ENSMODG00000010757		Mdo.4
	Opossum	1	401484445	ENSMODG00000019477		Mdo.1.a
	Opossum	1	586556941	ENSMODG00000008911		Mdo.1.b
	Chicken	23	1430459	ENSGALG00000000739		Gga.23
	Chicken	20	10049393	ENSGALG00000006467		Gga.20
	Chicken	2	114373278	ENSGALG00000015321		Gga.2.a
	Chicken	3	109739878	ENSGALG00000016646		Gga.3
	Chicken	2	121410426	ENSGALG00000022801		Gga.2.b
	Zebrafish	24	17538256	ENSDARG00000026500		Dre.24
	Zebrafish	23	6635153	ENSDARG00000026333		Dre.23
	Zebrafish	19	15711702	ENSDARG00000004498		Dre.19.a
	Zebrafish	19	15799267	ENSDARG00000039996		Dre.19.b
	Zebrafish	20	18907460	ENSDARG00000043410		Dre.20
	Zebrafish	23	29627303	ENSDARG00000036952		Dre.23.b
	Zebrafish	2	22475952	NP_001012258.1		Dre.2.NP_001012258.1
	Zebrafish	Zv7_scaffold2547	167619	ENSDARG00000020443		Dre.Zv7_sc2547
	Medaka	17	5053845	ENSORLG00000004273		Ola.17
	Medaka	2	24502104	ENSORLG00000004398		Ola.2
	Medaka	20	14729560	ENSORLG00000008057		Ola.20
	Medaka	11	19204663	ENSORLG00000009399		Ola.11.a
	Medaka	11	19212055	ENSORLG00000009411		Ola.11.b
	Medaka	7	22200982	ENSORLG00000014885		Ola.7.a
	Medaka	24	13882541	ENSORLG00000016409		Ola.24
	Medaka	7	26958466	ENSORLG00000016735		Ola.7.b
	Stickleback	groupX	2022325	ENSGacG00000002382		Gac.X.a
	Stickleback	groupX	2030532	ENSGacG00000002383		Gac.X.b
	Stickleback	groupXXI	6900599	ENSGacG00000002808		Gac.XXI
	Stickleback	groupXII	13403771	ENSGacG00000010506		Gac.XII.a
	Stickleback	groupXVIII	10871813	ENSGacG00000010869		Gac.XVIII
	Stickleback	groupXII	15651168	ENSGacG00000011910		Gac.XII.b
	Stickleback	groupIII	5438951	ENSGacG00000014715		Gac.III
	Stickleback	groupI	23434712	ENSGacG00000014946		Gac.I
	Sea squirt	7q	571792	ENSCING00000002861		Cin.7q
	Fruitfly	X	16157225	CG32579		Dme.X
	Florida lancelet	scaffold_508	477217	e_gw.508.7.1		Bfl.sc508
	Florida lancelet	scaffold_175	905159	fgenesh2_pg.scaffold_175000023		Bfl.sc175
	Sea lamprey	Contig5305	12667	GENSCAN00000054076		Pma.co5305
	Sea lamprey	Contig11899	6000	GENSCAN00000082436		Pma.co11899
YTHDF (YTH DOMAIN FAMILY)
	Human	8	64243991	ENSG00000185728	YTHDF3	Hsa.8.YTHDF3
	Human	20	61297226	ENSG00000149658	YTHDF1	Hsa.20.YTHDF1
	Human	1	28935858	ENSG00000198492	YTHDF2	Hsa.1.YTHDF2
	Dog	29	16242784	ENSCAFG00000007215		Cfa.29
	Dog	24	49974884	ENSCAFG00000012772		Cfa.24
	Dog	2	74675730	ENSCAFG00000011700		Cfa.2
	Opossum	3	175410937	ENSMODG00000008255	YTHDF3	Mdo.3
	Opossum	4	367907000	ENSMODG00000010973	YTHDF2	Mdo.4
	Opossum	1	474761444	ENSMODG00000016842	YTHDF1	Mdo.1
	Chicken	23	2518746	ENSGALG00000000959		Gga.23
	Chicken	20	8691047	ENSGALG00000005745		Gga.20
	Chicken	2	118026914	ENSGALG00000015505		Gga.2
	Zebrafish	24	22866218	ENSDARG00000057939		Dre.24
	Zebrafish	17	29880659	ENSDARG00000014498		Dre.17
	Zebrafish	8	21529906	ENSDARG00000016447		Dre.8
	Medaka	20	15521675	ENSORLG00000008640		Ola.20
	Medaka	7	16223748	ENSORLG00000009739		Ola.7.a
	Medaka	22	8763390	ENSORLG00000014323	YTHDF2	Ola.22
	Medaka	7	21990708	ENSORLG00000014665		Ola.7.b
	Stickleback	groupXII	229155	ENSGacG00000002613		Gac.XII.a
	Stickleback	groupXXI	7467320	ENSGacG00000002998	YTHDF3	Gac.XXI
	Stickleback	groupXV	7582493	ENSGacG00000009603		Gac.XV
	Stickleback	groupXII	15762583	ENSGacG00000012014	YTHDF1	Gac.XII.b
	Sea squirt	2q	362652	ENSCING00000004166		Cin.2q
	Fruitfly	3R	20859866	CG6422		Dme.3R
	Florida lancelet	scaffold_462	487006	e_gw.462.3.1		Bfl.sc462
	Sea lamprey	Contig2016	9441	GENSCAN00000138198		Pma.co2016
